# Supplementary material for: Microsecond sub-domain motions and the folding and misfolding of the mouse prion protein
Source: eLife. 2019 Apr 26;8:e44766. doi: 10.7554/eLife.44766 (PMC6516828; doi:10.7554/eLife.44766)
Supplement: Figure 2—figure supplement 1—source data 1. [file elife-44766-fig2-figsupp1-data1.xlsx]

## Sheet: Panel a
Lag time (ms)	Red Curve	Blue curve
0.0001375	-0.2034	-0.0938
0.0001625	-0.3047	0.025
0.0001875	-0.1112	-0.1515
0.0002125	-0.3476	0.1012
0.0002375	-0.346	0.1153
0.000275	-0.4003	0.192
0.000325	-0.2239	0.0435
0.000375	-0.1246	-0.03
0.000425	0.0911	-0.2219
0.000475	-0.0732	-0.0356
0.000525	-0.1955	0.1068
0.000575	-0.0066677	-0.0633
0.000625	-0.0118	-0.0412
0.000675	-0.0464	0.009067
0.000725	0.0631	-0.0861
0.0008	0.0581	-0.0621
0.0009	-0.1277	0.1454
0.001	0.0837	-0.0485
0.0011	-0.0955	0.1449
0.0012	0.0345	0.0262
0.0013	0.0138	0.0557
0.0014	0.1228	-0.0468
0.0015	0.131	-0.0504
0.0016	0.1101	-0.0266
0.0017	0.0278	0.0574
0.00185	0.1349	-0.0495
0.00205	0.1015	-0.0187
0.00225	0.0875	-0.01
0.00245	0.0821	-0.0115
0.00265	0.0835	-0.0208
0.00285	0.0377	0.0166
0.00305	0.0619	-0.0161
0.00325	-0.0041227	0.0414
0.00345	0.027	0.0020492
0.00365	0.0168	0.0045441
0.00395	0.0153	-0.0047686
0.00435	-0.0024716	0.00068359
0.00475	-0.0073478	-0.0045355
0.00515	-0.074	0.0541
0.00555	-0.0328	0.0067814
0.00595	-0.0149	-0.0156
0.00635	-0.0063183	-0.0273
0.00675	-0.0591	0.0235
0.00715	0.017	-0.0536
0.00755	-0.0098604	-0.0271
0.00815	-0.053	0.0166
0.00895	-0.0257	-0.0086239
0.00975	-0.0383	0.0068385
0.0106	-0.0297	0.0015537
0.0114	-0.0402	0.0154
0.0122	-0.0555	0.034
0.013	-0.0228	0.0042866
0.0138	0.0161	-0.0319
0.0146	-0.0288	0.0155
0.0154	-0.0381	0.0271
0.0166	-0.0164	0.0082306
0.0182	-0.0131	0.0079712
0.0198	0.00049207	-0.0032905
0.0214	0.0075691	-0.0085033
0.023	0.0521	-0.0516
0.0246	0.0149	-0.0131
0.0262	-6.3751e-05	0.0029075
0.0278	-0.0383	0.042
0.0294	0.0021657	0.0023117
0.031	0.0033899	0.0017486
0.0334	0.0182	-0.0122
0.0366	0.0131	-0.0061517
0.0398	0.0070446	0.00064702
0.043	0.024	-0.0157
0.0462	0.0098814	-0.0011993
0.0494	0.016	-0.006978
0.0526	0.0145	-0.0052969
0.0558	0.0127	-0.0035019
0.059	0.0173	-0.0080442
0.0622	-0.0119	0.021
0.067	0.0057431	0.0031442
0.0734	0.0125	-0.0041292
0.0798	0.0191	-0.0114
0.0862	0.005239	0.0015908
0.0926	0.00029575	0.0056382
0.099	0.0067505	-0.0017613
0.1054	0.0041765	-0.00015882
0.1118	-0.0039245	0.0069689
0.1182	-0.0217	0.0238
0.1246	0.0079092	-0.0067526
0.1342	-0.0124	0.0122
0.147	-0.0114	0.0096048
0.1598	-0.0012822	-0.0018894
0.1726	-0.0062364	0.0018829
0.1854	-0.0185	0.0132
0.1982	-0.0020029	-0.0040905
0.211	0.0014825	-0.0081675
0.2238	-0.0061323	-0.00098382
0.2366	-0.0102	0.002754
0.2494	-0.0054123	-0.0021566
0.2686	-0.0042318	-0.0033917
0.2942	-0.0033832	-0.0040429
0.3198	-0.0012919	-0.005711
0.3454	-0.0066809	0.00023043
0.371	0.0037203	-0.0095351
0.3966	-0.0025693	-0.002583
0.4222	-0.001921	-0.002561
0.4478	-0.0063989	0.0025731
0.4734	0.0016052	-0.0048069
0.499	0.0054492	-0.008052
0.5374	0.001372	-0.0031658
0.5886	0.0069359	-0.007783
0.6398	0.0025096	-0.0025604
0.691	0.0027503	-0.0021374
0.7422	0.0020539	-0.00088878
0.7934	0.0054523	-0.003832
0.8446	0.0035069	-0.0015046
0.8958	0.0029959	-0.00067859
0.947	-0.00034427	0.0029189
0.9982	0.0031528	-0.00035868
1.075	0.0026342	0.00041414
1.1774	0.0037433	-0.00045199
1.2798	0.0039579	-0.00050106
1.3822	0.0040506	-0.0004921
1.4846	0.0038937	-0.00026872
1.587	-0.00097249	0.0046249
1.6894	0.0014874	0.0021752
1.7918	-0.0021081	0.0057635
1.8942	-0.0014859	0.0051158
1.9966	0.0018436	0.0017556
2.1502	0.0024468	0.0010914
2.355	0.00044056	0.0030067
2.5598	0.0021458	0.0011972
2.7646	-0.00080978	0.004049
2.9694	0.00079929	0.0023337
3.1742	-0.0035493	0.0065819
3.379	-0.00068273	0.0036158
3.5838	-0.0052462	0.0080813
3.7886	-0.0045023	0.0072441
3.9934	-0.0014743	0.0041287
4.3006	-0.0025053	0.0050347
4.7102	-0.0039215	0.0062985
5.1198	-0.0021987	0.0044359
5.5294	-0.0024681	0.004579
5.939	-0.001339	0.0033355
6.3486	-0.0010729	0.0029655
6.7582	-0.0023667	0.0041633
7.1678	-4.3249e-05	0.0017511
7.5774	-0.00025191	0.0018787
7.987	-0.00093181	0.0024864
8.6014	-0.0021769	0.0036291
9.4206	-0.0006926	0.0020249
10.2398	-0.0010868	0.0023157
11.059	-0.0018307	0.0029694
11.8782	-0.0013119	0.0023708
12.6974	-0.0021357	0.0031241
13.5166	-0.0023266	0.0032517
14.3358	-0.0019999	0.002869
15.155	0.00051749	0.00030108
15.9742	-0.001313	0.0020855
17.203	-0.0013847	0.0020956
18.8414	-0.0031655	0.003806
20.4798	-0.0012596	0.001841
22.1182	-0.0019243	0.0024555
23.7566	-0.00024015	0.00072751
25.3951	-0.0017703	0.00222
27.0335	-0.00040501	0.00082149
28.6719	-3.3983e-05	0.00042122
30.3103	-0.00031795	0.00067911
31.9487	0.00021675	0.00012126
34.4063	0.00024868	5.8852e-05
37.6831	0.0001348	0.00013867
40.9599	0.00055953	-0.00031424
44.2367	-0.00067903	0.0009008
47.5135	-0.00060628	0.00080789
50.7904	0.00038828	-0.00020379
54.0672	-0.001395	0.0015646
57.344	-0.0010879	0.0012445
60.6208	-0.0011388	0.0012841
63.8976	0.00019425	-5.9095e-05
68.8128	0.0002849	-0.00016285
75.3665	-0.0008099	0.00091754
81.9201	-0.00069301	0.00078884
88.4737	-0.00027442	0.00036047
95.0273	7.213e-05	5.6772e-06
101.581	-0.00031059	0.00038142
108.135	-0.00033928	0.00040408
114.688	-0.00096148	0.0010211
121.242	0.00053294	-0.00047788
127.796	-0.0006534	0.00070448
137.626	7.9906e-05	-3.3966e-05
150.733	-0.0010179	0.0010582
163.84	-0.00060885	0.00064457
176.948	-0.00037585	0.00040781
190.055	0.00028117	-0.00025236
203.162	-0.00028625	0.0003124
216.269	-0.0005113	0.00053516
229.377	-0.00088455	0.00090645
242.484	-0.00052652	0.00054671
255.591	-0.00020354	0.00022224
275.252	4.1471e-05	-2.4701e-05
301.467	3.3852e-05	-1.9174e-05
327.681	0.0002206	-0.00020762
353.896	-0.00036775	0.00037934
380.11	-0.0007649	0.00077534
406.325	-0.00055214	0.0005616
432.539	0.00024454	-0.00023592
458.754	0.0006952	-0.0006873
484.968	0.00035313	-0.00034586
511.183	-0.00050869	0.00051542
550.504	-0.00020486	0.00021089
602.933	-0.0007846	0.00078987
655.362	-0.00039302	0.00039768
707.791	0.00063768	-0.00063353
760.22	0.00058206	-0.00057833
812.649	0.0001304	-0.00012702
865.078	-0.00019758	0.00020066
917.507	--	-0.00024178
969.936	--	-0.00025828
1022.37	--	-0.00066789

## Sheet: Panel b
Lag time (ms)	Red Curve	Blue curve
0.0001375	-0.3844	0.2546
0.0001625	-0.4336	0.3068
0.0001875	-0.2954	0.1716
0.0002125	-0.0116	-0.1093
0.0002375	-0.1743	0.0561
0.000275	-0.2382	0.1242
0.000325	-0.0757	-0.0329
0.000375	0.0276	-0.131
0.000425	-0.1626	0.0644
0.000475	-0.1865	0.0932
0.000525	-0.0038614	-0.0846
0.000575	-0.0378	-0.0459
0.000625	-0.1664	0.0872
0.000675	-0.0546	-0.0202
0.000725	-0.1678	0.0972
0.0008	-0.0478	-0.0166
0.0009	-0.0058083	-0.0508
0.001	0.0615	-0.1108
0.0011	-0.009468	-0.0329
0.0012	-0.0815	0.0456
0.0013	-0.1725	0.1426
0.0014	0.0662	-0.0904
0.0015	-0.1754	0.1565
0.0016	-0.0239	0.01
0.0017	0.1426	-0.1518
0.00185	-0.0066929	0.0038816
0.00205	-0.0178	0.0226
0.00225	0.0365	-0.0252
0.00245	0.0619	-0.0449
0.00265	0.0173	0.004517
0.00285	0.0165	0.0093856
0.00305	0.0603	-0.0309
0.00325	-0.0326	0.0649
0.00345	0.1578	-0.1233
0.00365	0.0063645	0.0301
0.00395	0.0031217	0.0354
0.00435	-0.0258	0.0658
0.00475	-0.0146	0.055
0.00515	0.031	0.0089931
0.00555	0.0332	0.0056731
0.00595	0.0823	-0.045
0.00635	0.0614	-0.026
0.00675	0.0667	-0.0337
0.00715	0.0181	0.0125
0.00755	0.0159	0.0122
0.00815	0.0191	0.0050767
0.00895	0.0322	-0.0133
0.00975	-0.0314	0.0452
0.0106	0.0403	-0.0313
0.0114	-0.0258	0.0305
0.0122	0.0018379	-0.001102
0.013	-0.0311	0.0283
0.0138	-0.0192	0.0132
0.0146	0.0531	-0.0617
0.0154	0.012	-0.023
0.0166	0.0249	-0.0388
0.0182	-0.024	0.0072684
0.0198	-0.0222	0.0037683
0.0214	-0.0205	0.0010812
0.023	-0.0419	0.0224
0.0246	-0.0317	0.0124
0.0262	-0.02	0.0014849
0.0278	-0.0239	0.0065207
0.0294	0.0107	-0.0267
0.031	-0.0215	0.0069751
0.0334	-0.0034299	-0.0084944
0.0366	-0.0304	0.0219
0.0398	0.0077201	-0.0126
0.043	0.0107	-0.0122
0.0462	0.0041597	-0.0026998
0.0494	-0.0064118	0.0105
0.0526	-0.0138	0.0202
0.0558	0.006829	0.0014628
0.059	-0.0149	0.0248
0.0622	0.0219	-0.0109
0.067	0.0163	-0.0040991
0.0734	0.0155	-0.0026497
0.0798	0.0196	-0.0070497
0.0862	0.0095839	0.0021775
0.0926	0.0039436	0.0065389
0.099	-0.0025765	0.0115
0.1054	0.0218	-0.0146
0.1118	0.0058357	-0.00051041
0.1182	0.0101	-0.0066519
0.1246	0.0060122	-0.0043407
0.1342	-0.0015629	0.000637
0.147	0.0021355	-0.0061159
0.1598	-0.0018797	-0.0046785
0.1726	-0.0132	0.0045302
0.1854	-0.0055313	-0.0047292
0.1982	-0.0119	0.00048489
0.211	-0.0112	-0.0011201
0.2238	-0.0198	0.0070131
0.2366	-0.0015035	-0.0116
0.2494	-0.0146	0.0015083
0.2686	-0.0088829	-0.00398
0.2942	-0.0137	0.0016367
0.3198	-0.014	0.0030069
0.3454	-0.0221	0.0122
0.371	-0.0146	0.0060602
0.3966	-0.0094204	0.002179
0.4222	-0.0084205	0.0024013
0.4478	-0.0041536	-0.00071716
0.4734	-0.005828	0.0020121
0.499	-0.0047238	0.0018676
0.5374	-0.0030792	0.0014782
0.5886	-0.0017299	0.0014856
0.6398	0.00039211	0.00040397
0.691	-0.0022991	0.0038743
0.7422	0.0014968	0.00065121
0.7934	0.0019304	0.00063637
0.8446	0.0065051	-0.00365
0.8958	0.0010196	0.0020327
0.947	0.0017356	0.001443
0.9982	0.0043331	-0.0010797
1.075	0.0042753	-0.00096717
1.1774	0.0085087	-0.0052199
1.2798	0.0064149	-0.0031895
1.3822	0.0049527	-0.001817
1.4846	0.0053394	-0.0023011
1.587	0.0066378	-0.0037
1.6894	0.0052933	-0.0024545
1.7918	0.0078954	-0.0051536
1.8942	0.0045541	-0.0019007
1.9966	0.0038995	-0.0013333
2.1502	0.0039459	-0.0015025
2.355	0.0011572	0.0011379
2.5598	0.0040431	-0.001888
2.7646	0.0047264	-0.0026895
2.9694	0.0054225	-0.0034909
3.1742	0.0039675	-0.0021311
3.379	0.0014902	0.00025524
3.5838	0.0027501	-0.0010903
3.7886	0.0013342	0.00025195
3.9934	0.0015144	2.208e-06
4.3006	0.0028454	-0.0014243
4.7102	0.00098242	0.00032856
5.1198	0.0021327	-0.00091836
5.5294	0.0025628	-0.0014302
5.939	0.0011881	-0.00012738
6.3486	-2.9656e-05	0.0010203
6.7582	-0.00075584	0.0016907
7.1678	9.7063e-05	0.00078224
7.5774	-8.1215e-05	0.00091495
7.987	3.4519e-05	0.0007558
8.6014	-0.00034441	0.0010758
9.4206	-0.0014513	0.0021132
10.2398	-0.0011776	0.0017865
11.059	-0.0014772	0.0020358
11.8782	-0.00015978	0.00067538
12.6974	-0.0027829	0.0032607
13.5166	-0.0018442	0.0022898
14.3358	-0.0020865	0.0025028
15.155	-0.0028329	0.0032235
15.9742	-0.0005598	0.00092702
17.203	-0.0026593	0.0029959
18.8414	-0.0028586	0.0031599
20.4798	-0.002186	0.0024581
22.1182	-0.0020509	0.002299
23.7566	-0.002722	0.002949
25.3951	-0.0010914	0.0012998
27.0335	-0.0011391	0.0013316
28.6719	-0.00058262	0.00076104
30.3103	-0.00075032	0.00091643
31.9487	6.534e-05	9.0024e-05
34.4063	-0.00061515	0.00075608
37.6831	-0.00075665	0.00088156
40.9599	-0.0006485	0.00076028
44.2367	-0.0016234	0.0017242
47.5135	-0.00075397	0.00084574
50.7904	-0.00018761	0.00027109
54.0672	-0.0013171	0.0013938
57.344	-8.2898e-05	0.00015369
60.6208	-0.00084259	0.00090825
63.8976	-0.00044612	0.00050713
68.8128	-0.0012031	0.0012581
75.3665	-0.00030784	0.00035629
81.9201	-0.00026765	0.00031072
88.4737	-0.00080267	0.0008413
95.0273	0.00019452	-0.00015961
101.581	-0.00085929	0.00089104
108.135	-0.0007475	0.0007765
114.688	-0.00073729	0.00076395
121.242	-0.00020923	0.00023381
127.796	-0.0008926	0.00091544
137.626	-0.0015399	0.0015605
150.733	-0.0013386	0.0013566
163.84	-0.00069323	0.00070916
176.948	-0.00037745	0.00039173
190.055	-0.00033244	0.00034529
203.162	0.00010846	-9.6803e-05
216.269	0.00042093	-0.0004103
229.377	0.00038703	-0.00037728
242.484	-0.00055019	0.00055916
255.591	-0.00017233	0.00018067
275.252	0.00028168	-0.00027422
301.467	-0.00021646	0.00022298
327.681	-0.00011082	0.00011659
353.896	-3.1891e-07	5.4699e-06
380.11	0.00021015	-0.00020551
406.325	0.00022529	-0.00022109
432.539	-1.8687e-05	2.2516e-05
458.754	-6.1036e-05	6.4545e-05
484.968	-0.00037046	0.00037368
511.183	-9.4938e-05	9.7932e-05
550.504	-0.00016728	0.00016995
602.933	-0.00035189	0.00035423
655.362	0.00024805	-0.00024599
707.791	0.0003272	-0.00032536
760.22	-0.00034794	0.0003496
812.649	1.4279e-05	-1.2779e-05
865.078	0.00012087	-0.0001195
917.507	--	0.00038871
969.936	--	0.00031533
1022.37	--	-0.00011334
