# Supplementary material for: Microsecond sub-domain motions and the folding and misfolding of the mouse prion protein
Source: eLife. 2019 Apr 26;8:e44766. doi: 10.7554/eLife.44766 (PMC6516828; doi:10.7554/eLife.44766)
Supplement: Figure 2—figure supplement 2—source data 1. [file elife-44766-fig2-figsupp2-data1.xlsx]

## Sheet: Sheet1
Lag time (ms)	Red curve	Lagtime (ms)	Black line
0.000275	1.2203	0.000275	1.2344
0.000325	1.2515	0.00029174	1.2344
0.000375	1.1973	0.0003095	1.2343
0.000425	1.3265	0.00032835	1.2342
0.000475	1.2812	0.00034833	1.2341
0.00055	1.2378	0.00036954	1.234
0.00065	1.2659	0.00039204	1.2339
0.00075	1.2011	0.0004159	1.2338
0.00085001	1.2536	0.00044122	1.2337
0.00095001	1.2125	0.00046808	1.2336
0.00105	1.2152	0.00049658	1.2335
0.00115	1.2364	0.00052681	1.2333
0.00125	1.2462	0.00055888	1.2332
0.00135	1.2106	0.0005929	1.233
0.00145	1.2749	0.00062899	1.2329
0.0016	1.2228	0.00066729	1.2327
0.0018	1.2413	0.00070791	1.2325
0.002	1.2512	0.000751	1.2323
0.0022	1.2209	0.00079672	1.2321
0.0024	1.2183	0.00084523	1.2319
0.0026	1.2388	0.00089668	1.2317
0.0028	1.2233	0.00095127	1.2315
0.003	1.24	0.0010092	1.2312
0.0032	1.232	0.0010706	1.2309
0.0034	1.2211	0.0011358	1.2306
0.0037	1.2114	0.0012049	1.2303
0.0041	1.2236	0.0012783	1.23
0.0045	1.2117	0.0013561	1.2297
0.0049	1.2221	0.0014387	1.2293
0.0053	1.1924	0.0015262	1.2289
0.0057	1.1928	0.0016192	1.2285
0.0061	1.2126	0.0017177	1.2281
0.0065	1.1986	0.0018223	1.2277
0.0069	1.2103	0.0019332	1.2272
0.0073	1.2056	0.0020509	1.2267
0.0079	1.1941	0.0021758	1.2261
0.0087001	1.1998	0.0023082	1.2256
0.0095001	1.2044	0.0024488	1.225
0.0103	1.1931	0.0025978	1.2243
0.0111	1.1719	0.002756	1.2236
0.0119	1.1687	0.0029238	1.2229
0.0127	1.167	0.0031017	1.2222
0.0135	1.17	0.0032906	1.2213
0.0143	1.1711	0.0034909	1.2205
0.0151	1.1358	0.0037034	1.2196
0.0163	1.1615	0.0039289	1.2186
0.0179	1.1543	0.004168	1.2176
0.0195	1.1381	0.0044218	1.2166
0.0211	1.1272	0.004691	1.2154
0.0227	1.1373	0.0049765	1.2142
0.0243	1.1255	0.0052795	1.213
0.0259	1.1218	0.0056009	1.2116
0.0275	1.1141	0.0059419	1.2102
0.0291	1.1237	0.0063036	1.2087
0.0307	1.105	0.0066873	1.2071
0.0331	1.1109	0.0070944	1.2055
0.0363	1.1001	0.0075263	1.2037
0.0395	1.0848	0.0079845	1.2019
0.0427	1.0777	0.0084706	1.1999
0.0459	1.0671	0.0089862	1.1978
0.0491	1.062	0.0095333	1.1957
0.0523	1.0562	0.0101	1.1934
0.0555	1.0505	0.0107	1.1909
0.0587	1.0381	0.0114	1.1884
0.0619	1.0338	0.0121	1.1857
0.0667	1.0341	0.0128	1.1829
0.0731	1.021	0.0136	1.1799
0.0795	1.0039	0.0144	1.1768
0.0859	0.9984	0.0153	1.1735
0.0923	0.9904	0.0162	1.17
0.0987	0.9771	0.0172	1.1664
0.1051	0.9657	0.0183	1.1626
0.1115	0.9596	0.0194	1.1586
0.1179	0.9521	0.0206	1.1545
0.1243	0.9395	0.0218	1.1501
0.1339	0.926	0.0231	1.1455
0.1467	0.9105	0.0245	1.1407
0.1595	0.8976	0.026	1.1357
0.1723	0.881	0.0276	1.1305
0.1851	0.8675	0.0293	1.1251
0.1979	0.855	0.0311	1.1194
0.2107	0.839	0.033	1.1135
0.2235	0.8301	0.035	1.1074
0.2363	0.8145	0.0371	1.1011
0.2491	0.8071	0.0394	1.0945
0.2683	0.7887	0.0418	1.0877
0.2939	0.7691	0.0443	1.0806
0.3195	0.7506	0.047	1.0733
0.3451	0.7343	0.0499	1.0658
0.3707	0.7162	0.0529	1.058
0.3963	0.7015	0.0561	1.05
0.4219	0.6851	0.0595	1.0418
0.4475	0.6714	0.0632	1.0334
0.4731	0.6578	0.067	1.0247
0.4987	0.6443	0.0711	1.0159
0.5371	0.6279	0.0754	1.0069
0.5883	0.6035	0.08	0.9977
0.6395	0.5848	0.0849	0.9883
0.6907	0.5655	0.0901	0.9788
0.7419	0.5461	0.0955	0.9692
0.7931	0.5311	0.1014	0.9594
0.8443	0.5161	0.1075	0.9495
0.8955	0.5006	0.1141	0.9395
0.9467	0.4868	0.121	0.9293
0.9979	0.4755	0.1284	0.9191
1.0747	0.4562	0.1362	0.9089
1.1771	0.4346	0.1445	0.8985
1.2795	0.4169	0.1533	0.8881
1.3819	0.3992	0.1626	0.8776
1.4843	0.3823	0.1725	0.8671
1.5867	0.3683	0.183	0.8565
1.6891	0.3538	0.1942	0.8458
1.7915	0.3437	0.206	0.835
1.8939	0.3314	0.2185	0.8242
1.9963	0.3209	0.2318	0.8133
2.1499	0.3064	0.2459	0.8023
2.3547	0.2895	0.2609	0.7911
2.5595	0.2745	0.2768	0.7798
2.7643	0.2602	0.2936	0.7684
2.9691	0.2483	0.3115	0.7568
3.1739	0.2368	0.3305	0.745
3.3787	0.2264	0.3506	0.733
3.5835	0.2179	0.3719	0.7208
3.7883	0.2092	0.3946	0.7084
3.9931	0.2014	0.4186	0.6958
4.3003	0.1923	0.4441	0.6829
4.7099	0.1817	0.4711	0.6698
5.1195	0.1721	0.4998	0.6565
5.5291	0.1614	0.5302	0.643
5.9387	0.1541	0.5625	0.6293
6.3483	0.146	0.5968	0.6154
6.7579	0.139	0.6331	0.6013
7.1675	0.1336	0.6716	0.587
7.5771	0.1291	0.7125	0.5726
7.9867	0.1233	0.7559	0.5581
8.6012	0.1172	0.8019	0.5434
9.4204	0.1085	0.8507	0.5287
10.2396	0.1018	0.9025	0.514
11.0588	0.0967	0.9575	0.4992
11.878	0.0922	1.0158	0.4845
12.6972	0.0887	1.0776	0.4697
13.5164	0.0856	1.1432	0.455
14.3356	0.0826	1.2128	0.4404
15.1548	0.079	1.2866	0.4259
15.974	0.0758	1.3649	0.4115
17.2028	0.0727	1.448	0.3973
18.8412	0.0673	1.5362	0.3832
20.4796	0.0626	1.6297	0.3694
22.118	0.059	1.7289	0.3557
23.7564	0.057	1.8342	0.3423
25.3949	0.0521	1.9458	0.3291
27.0333	0.0497	2.0643	0.3162
28.6717	0.0482	2.1899	0.3036
30.3101	0.0453	2.3233	0.2912
31.9485	0.0421	2.4647	0.2792
34.4061	0.0422	2.6147	0.2674
37.6829	0.0387	2.7739	0.256
40.9597	0.0372	2.9428	0.2449
44.2366	0.0347	3.1219	0.2341
47.5134	0.0319	3.312	0.2237
50.7902	0.0278	3.5136	0.2136
54.067	0.0268	3.7275	0.2039
57.3438	0.0243	3.9544	0.1944
60.6207	0.0237	4.1952	0.1854
63.8975	0.0226	4.4506	0.1766
68.8127	0.0198	4.7215	0.1682
75.3664	0.0185	5.0089	0.1601
81.92	0.0173	5.3139	0.1523
88.4736	0.0145	5.6374	0.1448
95.0273	0.0158	5.9806	0.1376
101.581	0.0148	6.3446	0.1308
108.135	0.015	6.7309	0.1242
114.688	0.0142	7.1406	0.1179
121.242	0.0112	7.5753	0.1119
127.796	0.0104	8.0365	0.1062
137.626	0.009323	8.5257	0.1007
150.733	0.0103	9.0448	0.0955
163.84	0.009639	9.5954	0.0905
176.948	0.009756	10.1795	0.0857
190.055	0.0109	10.7992	0.0812
203.162	0.0102	11.4566	0.0769
216.27	0.0111	12.1541	0.0728
229.377	0.0114	12.894	0.0689
242.484	0.0101	13.679	0.0652
255.591	0.0096312	14.5117	0.0617
275.252	0.0096157	15.3951	0.0584
301.467	0.01	16.3323	0.0552
327.682	0.0080726	17.3266	0.0522
353.896	0.008928	18.3814	0.0494
380.111	0.0105	19.5004	0.0467
406.325	0.0098972	20.6875	0.0441
432.54	0.0092944	21.9469	0.0417
458.754	0.0067595	23.283	0.0394
484.969	0.0072571	24.7004	0.0372
511.183	0.0072746	26.2041	0.0351
550.505	0.0064822	27.7993	0.0332
602.934	0.0066088	29.4917	0.0314
655.363	0.0062867	31.2871	0.0296
707.793	0.007828	33.1917	0.028
760.222	0.0068782	35.2123	0.0264
812.651	0.0069064	37.356	0.0249
865.08	0.0050347	39.6301	0.0235
917.509	0.0034024	42.0427	0.0222
969.938	0.0034724	44.6021	0.021
1022.37	0.0036779	47.3174	0.0198
		50.1979	0.0187
		53.2538	0.0176
		56.4958	0.0166
		59.9351	0.0157
		63.5837	0.0148
		67.4545	0.014
		71.561	0.0132
		75.9174	0.0124
		80.5391	0.0117
		85.4421	0.011
		90.6435	0.0104
		96.1617	0.0098284
		102.016	0.0092696
		108.226	0.0087424
		114.815	0.0082448
		121.804	0.0077754
		129.219	0.0073325
		137.086	0.0069146
		145.431	0.0065204
		154.285	0.0061486
		163.677	0.0057978
		173.641	0.0054669
		184.212	0.0051548
		195.427	0.0048604
		207.323	0.0045828
		219.945	0.004321
		233.334	0.004074
		247.539	0.0038411
		262.609	0.0036215
		278.596	0.0034144
		295.556	0.0032191
		313.548	0.0030349
		332.636	0.0028613
		352.886	0.0026975
		374.369	0.0025431
		397.159	0.0023975
		421.337	0.0022603
		446.987	0.0021309
		474.199	0.0020088
		503.067	0.0018938
		533.692	0.0017853
		566.182	0.001683
		600.649	0.0015866
		637.215	0.0014957
		676.007	0.00141
		717.16	0.0013292
		760.819	0.001253
		807.135	0.0011812
		856.272	0.0011135
		908.399	0.0010496
		963.7	0.00098947
		1022.37	0.00093274
