# Supplementary material for: Microsecond sub-domain motions and the folding and misfolding of the mouse prion protein
Source: eLife. 2019 Apr 26;8:e44766. doi: 10.7554/eLife.44766 (PMC6516828; doi:10.7554/eLife.44766)
Supplement: Figure 2—figure supplement 3—source data 1. [file elife-44766-fig2-figsupp3-data1.xlsx]

## Sheet: Panel a
Urea (M)	Blue dots	Fit (blue line)	Urea (M)	Red line	Urea (M)	Black line
0	0.9999	1.0062	0	3.1383	0	0.9857
0	0.9981	1.0062	3	3.5146	3	1.1736
0	1.0122	1.0062	6	3.8909	6	1.3615
0.1333	1.0036	1.008
0.3998	1.0247	1.0142
0.6663	1.0286	1.0263
0.7996	1.0398	1.0355
0.9329	1.0279	1.0478
1.1994	1.0898	1.0848
1.3327	1.1092	1.1118
1.4659	1.1638	1.1463
1.5992	1.222	1.19
1.7324	1.2622	1.2448
1.999	1.3858	1.3958
2.1322	1.4375	1.4955
2.2655	1.5733	1.6129
2.3988	1.7328	1.7481
2.532	1.9199	1.8997
2.6653	2.1109	2.065
2.7986	2.2939	2.2395
2.9318	2.4155	2.418
3.0651	2.5405	2.5948
3.1984	2.763	2.7643
3.3316	2.925	2.922
3.5982	3.2122	3.1912
3.8647	3.401	3.394
4.1312	3.4519	3.5384
4.3978	3.6905	3.6384
4.6643	3.7079	3.7078
4.9308	3.7476	3.7571
5.4639	3.8682	3.8225
5.7304	3.8789	3.8465
5.9969	3.8092	3.8676

## Sheet: Panel b
Urea (M)	Blue dots	Fit (blue line)		Urea (M)	Black line	Red line
0	0.8	0.8064		0	0.8065	0.4691
0	0.8121	0.8064		3	1.1977	1.0086
0	0.7925	0.8064		6	1.5889	1.5481
0.133	0.825	0.8229
0.399	0.868	0.8557
0.665	0.8895	0.8876
0.798	0.9058	0.903
0.931	0.9277	0.9178
1.197	0.9404	0.9446
1.33	0.9519	0.9558
1.463	0.959	0.9651
1.596	0.9644	0.9719
1.729	0.9776	0.9759
1.995	0.9755	0.9763
2.128	0.9875	0.9744
2.261	0.9695	0.9731
2.394	--	0.9741
2.527	--	0.9786
2.66	0.9935	0.9871
2.793	0.996	0.9993
2.926	0.9989	1.0147
3.059	1.0254	1.0327
3.192	1.058	1.0525
3.325	1.0701	1.0736
3.591	1.127	1.1183
3.857	1.1687	1.1646
4.123	1.222	1.2117
4.389	1.2591	1.2591
4.655	1.3155	1.3066
4.921	1.3377	1.3542
5.453	1.4462	1.4493
5.719	1.4993	1.4969
5.985
