# Supplementary material for: Microsecond sub-domain motions and the folding and misfolding of the mouse prion protein
Source: eLife. 2019 Apr 26;8:e44766. doi: 10.7554/eLife.44766 (PMC6516828; doi:10.7554/eLife.44766)
Supplement: Figure 2—source data 1. [file elife-44766-fig2-data1.xlsx]

## Sheet: Panel a
Lag time	ACF of Atto 655 (Blue curve)	Fit to data on column B	ACF of Trp-less C 199 Atto moPrP (Green curve)	Fit to data on column C	ACF of W144/C199 Atto moPrP (Red curve)	Fit to data on column D
0.0001375	1.0211	0.9904	1.3638	1.339	3.2994	3.3932
0.0001625	1.0203	0.99	1.3001	1.3273	3.384	3.3589
0.0001875	1.0459	0.9895	1.3325	1.3169	3.174	3.3255
0.0002125	1.0337	0.9891	1.2887	1.3075	3.394	3.2928
0.0002375	0.9733	0.9887	1.3048	1.299	3.3761	3.2609
0.000275	1.0287	0.988	1.2634	1.2879	3.4064	3.2144
0.000325	0.9996	0.9872	1.2745	1.2756	3.1985	3.1549
0.000375	0.9893	0.9863	1.2913	1.2656	3.0683	3.0982
0.000425	0.9913	0.9855	1.2624	1.2574	2.8221	3.0441
0.000475	1.0174	0.9846	1.2529	1.2507	2.9567	2.9924
0.000525	1.0088	0.9838	1.2457	1.2451	3.0498	2.943
0.000575	0.9847	0.9829	1.2456	1.2405	2.8324	2.8957
0.000625	1.0085	0.9821	1.2174	1.2366	2.8094	2.8506
0.000675	0.9882	0.9812	1.2441	1.2333	2.8165	2.8074
0.000725	1.0057	0.9804	1.2238	1.2305	2.68	2.7661
0.0008	0.9989	0.9791	1.2452	1.2269	2.6453	2.7074
0.0009	1.0088	0.9774	1.2203	1.2231	2.7801	2.6347
0.001	1.0116	0.9757	1.2172	1.22	2.5194	2.5679
0.0011	0.9861	0.9741	1.2021	1.2173	2.6512	2.5063
0.0012	0.9959	0.9724	1.2091	1.215	2.4757	2.4495
0.0013	0.9819	0.9708	1.227	1.2129	2.4525	2.3969
0.0014	0.9852	0.9691	1.2121	1.2109	2.3014	2.3482
0.0015	0.9891	0.9675	1.1966	1.2091	2.2525	2.3029
0.0016	1.0088	0.9658	1.2188	1.2073	2.2342	2.2608
0.0017	0.9837	0.9642	1.1987	1.2056	2.2789	2.2215
0.00185	0.9762	0.9617	1.2084	1.2031	2.1178	2.1673
0.00205	0.9783	0.9585	1.2048	1.1999	2.0841	2.1028
0.00225	0.969	0.9553	1.1936	1.1969	2.0357	2.0457
0.00245	0.9735	0.9521	1.1985	1.194	1.9833	1.9947
0.00265	0.9694	0.9489	1.1824	1.1912	1.9282	1.949
0.00285	0.9621	0.9457	1.1825	1.1885	1.9243	1.9077
0.00305	0.9606	0.9426	1.1742	1.1859	1.8539	1.8701
0.00325	0.9406	0.9395	1.1811	1.1834	1.8771	1.8357
0.00345	0.9568	0.9364	1.1875	1.181	1.8062	1.8041
0.00365	0.9519	0.9333	1.1878	1.1787	1.7795	1.775
0.00395	0.9435	0.9287	1.1764	1.1753	1.7305	1.7352
0.00435	0.9239	0.9227	1.1798	1.171	1.689	1.6884
0.00475	0.9385	0.9168	1.1606	1.167	1.6428	1.6473
0.00515	0.9165	0.9109	1.1571	1.1632	1.6651	1.611
0.00555	0.8975	0.9051	1.1623	1.1595	1.5855	1.5787
0.00595	0.9043	0.8993	1.1526	1.156	1.5343	1.5499
0.00635	0.9099	0.8937	1.1647	1.1527	1.4967	1.524
0.00675	0.8985	0.8881	1.1475	1.1494	1.5241	1.5006
0.00715	0.8874	0.8825	1.1416	1.1463	1.4259	1.4796
0.00755	0.8767	0.8771	1.1435	1.1433	1.4333	1.4605
0.00815	0.8833	0.869	1.1467	1.1389	1.4516	1.435
0.00895	0.8668	0.8585	1.1336	1.1333	1.3975	1.4061
0.00975	0.8548	0.8482	1.1258	1.1279	1.3887	1.3819
0.0106	0.8348	0.8381	1.1197	1.1227	1.3628	1.3612
0.0114	0.835	0.8283	1.1227	1.1177	1.3589	1.3435
0.0122	0.8196	0.8187	1.1123	1.1127	1.3621	1.3281
0.013	0.8083	0.8093	1.1087	1.1079	1.3188	1.3146
0.0138	0.7915	0.8002	1.1048	1.1032	1.2706	1.3025
0.0146	0.7898	0.7912	1.1009	1.0985	1.3071	1.2915
0.0154	0.7778	0.7824	1.0933	1.0939	1.3087	1.2816
0.0166	0.7702	0.7696	1.0876	1.087	1.2762	1.268
0.0182	0.7485	0.7531	1.0806	1.0781	1.2598	1.2518
0.0198	0.7363	0.7373	1.0701	1.0694	1.2338	1.2371
0.0214	0.721	0.7222	1.0587	1.0608	1.215	1.2235
0.023	0.7045	0.7076	1.0496	1.0523	1.1591	1.2106
0.0246	0.6957	0.6936	1.0446	1.044	1.1852	1.1983
0.0262	0.6778	0.6801	1.0411	1.0358	1.1894	1.1865
0.0278	0.6626	0.6672	1.0256	1.0277	1.217	1.175
0.0294	0.648	0.6547	1.0225	1.0197	1.1662	1.1639
0.031	0.638	0.6426	1.0104	1.0119	1.1547	1.153
0.0334	0.6179	0.6253	0.9985	1.0003	1.125	1.1372
0.0366	0.5989	0.6036	0.9811	0.9853	1.1108	1.1169
0.0398	0.5768	0.5834	0.9681	0.9707	1.0982	1.0976
0.043	0.5578	0.5644	0.954	0.9565	1.0633	1.079
0.0462	0.5417	0.5465	0.94	0.9428	1.06	1.0612
0.0494	0.5244	0.5298	0.9285	0.9294	1.0372	1.0441
0.0526	0.5072	0.514	0.9128	0.9163	1.0224	1.0277
0.0558	0.4904	0.499	0.9008	0.9037	1.0084	1.0119
0.059	0.4807	0.4849	0.891	0.8913	0.9887	0.9968
0.0622	0.4664	0.4716	0.8754	0.8793	1.0032	0.9822
0.067	0.4472	0.4528	0.8633	0.8618	0.9644	0.9613
0.0734	0.4265	0.43	0.8398	0.8396	0.931	0.9351
0.0798	0.4073	0.4092	0.8179	0.8185	0.8993	0.9108
0.0862	0.3876	0.3903	0.7978	0.7984	0.8896	0.888
0.0926	0.3666	0.373	0.7787	0.7793	0.8723	0.8667
0.099	0.3547	0.3571	0.7605	0.7611	0.8449	0.8467
0.1054	0.339	0.3425	0.7427	0.7437	0.8277	0.8279
0.1118	0.3289	0.3289	0.7293	0.7271	0.8171	0.8101
0.1182	0.3133	0.3164	0.7123	0.7112	0.8171	0.7933
0.1246	0.301	0.3047	0.6977	0.696	0.7706	0.7774
0.1342	0.2879	0.2886	0.6752	0.6744	0.7673	0.755
0.147	0.2672	0.2696	0.6486	0.6477	0.7373	0.7277
0.1598	0.2523	0.2528	0.6253	0.6231	0.7008	0.7027
0.1726	0.2355	0.2378	0.6022	0.6003	0.6817	0.6798
0.1854	0.2226	0.2245	0.5811	0.5792	0.6718	0.6586
0.1982	0.212	0.2124	0.5629	0.5595	0.6348	0.6389
0.211	0.2016	0.2016	0.543	0.5412	0.6124	0.6206
0.2238	0.1919	0.1917	0.5253	0.5241	0.6025	0.6034
0.2366	0.1818	0.1827	0.5093	0.5081	0.5901	0.5873
0.2494	0.1741	0.1745	0.4952	0.493	0.5699	0.5721
0.2686	0.1641	0.1633	0.475	0.4721	0.5474	0.5508
0.2942	0.1505	0.1503	0.4484	0.4469	0.5209	0.5249
0.3198	0.1385	0.1392	0.4253	0.4244	0.4957	0.5014
0.3454	0.1293	0.1294	0.4036	0.404	0.4802	0.48
0.371	0.122	0.1208	0.385	0.3856	0.4507	0.4603
0.3966	0.1148	0.1133	0.3692	0.3688	0.4395	0.4421
0.4222	0.1073	0.1065	0.3518	0.3534	0.4227	0.4253
0.4478	0.1028	0.1004	0.3389	0.3392	0.4123	0.4097
0.4734	0.096	0.095	0.3254	0.3261	0.3903	0.3951
0.499	0.0908	0.09	0.3127	0.314	0.3735	0.3816
0.5374	0.0845	0.0834	0.2946	0.2974	0.3596	0.3628
0.5886	0.0774	0.0758	0.276	0.2778	0.3326	0.3404
0.6398	0.071	0.0694	0.258	0.2605	0.3179	0.3204
0.691	0.0656	0.0639	0.2427	0.2452	0.3005	0.3026
0.7422	0.06	0.0591	0.2289	0.2315	0.2857	0.2866
0.7934	0.0562	0.0549	0.2169	0.2192	0.2682	0.2721
0.8446	0.0531	0.0512	0.2055	0.2081	0.2574	0.2589
0.8958	0.0495	0.048	0.1955	0.198	0.2462	0.2468
0.947	0.0468	0.045	0.187	0.1887	0.2387	0.2358
0.9982	0.0438	0.0424	0.1775	0.1803	0.2253	0.2257
1.075	0.0405	0.0389	0.167	0.1688	0.2123	0.2119
1.1774	0.0365	0.035	0.1542	0.1555	0.1954	0.1959
1.2798	0.0324	0.0317	0.1433	0.1441	0.1814	0.1819
1.3822	0.0299	0.0289	0.1334	0.134	0.1692	0.1697
1.4846	0.0268	0.0265	0.1243	0.1252	0.1586	0.1589
1.587	0.0246	0.0245	0.1172	0.1174	0.154	0.1493
1.6894	0.0232	0.0226	0.1092	0.1105	0.1429	0.1407
1.7918	0.0219	0.0211	0.1035	0.1042	0.1388	0.133
1.8942	0.0205	0.0196	0.0981	0.0986	0.1312	0.1261
1.9966	0.0192	0.0184	0.0931	0.0935	0.1215	0.1197
2.1502	0.0175	0.0167	0.087	0.0866	0.1123	0.1112
2.355	0.016	0.0149	0.0796	0.0788	0.1045	0.1015
2.5598	0.0141	0.0134	0.073	0.0722	0.0944	0.0932
2.7646	0.0126	0.0121	0.068	0.0665	0.09	0.086
2.9694	0.0118	0.011	0.0634	0.0615	0.0821	0.0798
3.1742	0.0108	0.0101	0.0597	0.0572	0.0809	0.0743
3.379	0.0103	0.0092929	0.056	0.0534	0.0731	0.0694
3.5838	0.0096842	0.0085906	0.0526	0.05	0.0732	0.0651
3.7886	0.008852	0.0079726	0.0498	0.0469	0.0685	0.0613
3.9934	0.0090021	0.0074265	0.0477	0.0442	0.0619	0.0578
4.3006	0.0071138	0.0067161	0.043	0.0406	0.0582	0.0532
4.7102	0.0063986	0.0059324	0.0392	0.0365	0.0543	0.048
5.1198	0.0061149	0.0052904	0.0356	0.0331	0.048	0.0436
5.5294	0.0051458	0.0047568	0.033	0.0302	0.0444	0.0399
5.939	0.0044667	0.0043078	0.0304	0.0277	0.04	0.0366
6.3486	0.0045301	0.003925	0.0287	0.0256	0.0368	0.0339
6.7582	0.0043364	0.0035962	0.0274	0.0237	0.0356	0.0314
7.1678	0.0038387	0.0033109	0.025	0.022	0.031	0.0293
7.5774	0.0042056	0.0030614	0.0234	0.0206	0.0292	0.0273
7.987	0.0033445	0.0028421	0.0228	0.0192	0.0281	0.0256
8.6014	0.0029299	0.0025583	0.0212	0.0175	0.027	0.0234
9.4206	0.0023514	0.0022477	0.0194	0.0156	0.0229	0.0209
10.2398	0.0022672	0.0019951	0.0177	0.014	0.0211	0.0188
11.059	0.0022521	0.0017866	0.0168	0.0127	0.02	0.017
11.8782	0.0020273	0.0016121	0.0157	0.0116	0.0179	0.0155
12.6974	0.0019359	0.0014643	0.0146	0.0106	0.0174	0.0143
13.5166	0.0015898	0.0013378	0.0135	0.0097474	0.0164	0.0131
14.3358	0.0015287	0.0012285	0.0128	0.0090129	0.015	0.0122
15.155	0.0015181	0.0011333	0.0116	0.0083668	0.0116	0.0113
15.9742	0.0010721	0.0010499	0.0114	0.0077949	0.0126	0.0105
17.203	0.0015315	0.00094246	0.0111	0.0070517	0.0116	0.0095511
18.8414	0.0012248	0.00082534	0.0097419	0.0062305	0.0123	0.0084526
20.4798	0.0010077	0.00073058	0.0087443	0.0055578	0.0093919	0.0075508
22.1182	0.0012025	0.00065269	0.0084889	0.0049985	0.009255	0.0067995
23.7566	0.00093339	0.00058771	0.008059	0.0045274	0.0068931	0.0061656
25.3951	0.0007997	0.00053285	0.0081607	0.0041261	0.0078448	0.0056248
27.0335	0.00075513	0.00048603	0.0074345	0.003781	0.0059805	0.005159
28.6719	0.00053752	0.00044569	0.0070446	0.0034816	0.0051755	0.0047543
30.3103	0.00041577	0.00041061	0.0064149	0.0032198	0.0050792	0.0044001
31.9487	0.00053245	0.00037992	0.0063182	0.0029893	0.0042091	0.0040878
34.4063	0.00037945	0.00034052	0.0061603	0.0026915	0.0037429	0.0036841
37.6831	7.343e-05	0.00029766	0.0063816	0.0023651	0.0033793	0.0032406
40.9599	0.00040828	0.00026311	0.006161	0.0020997	0.0025654	0.0028797
44.2367	0.00043225	0.00023472	0.0060134	0.0018806	0.003482	0.0025812
47.5135	0.00025647	0.00021113	0.0053353	0.0016971	0.0031389	0.002331
50.7904	0.00033458	0.00019122	0.0051105	0.0015417	0.001915	0.0021188
54.0672	0.00019648	0.00017427	0.0049953	0.0014086	0.0035016	0.001937
57.344	0.00017982	0.00015969	0.0053005	0.0012937	0.0030242	0.0017798
60.6208	0.00037291	0.000147	0.0049018	0.0011935	0.0029268	0.0016428
63.8976	0.00023483	0.00013594	0.0054546	0.0011057	0.0014634	0.0015225
68.8128	0.00033138	0.00012174	0.0055187	0.00099273	0.0012048	0.0013676
75.3665	0.00011342	0.00010632	0.0047692	0.00086942	0.002116	0.0011985
81.9201	9.8402e-05	9.3895e-05	0.0044499	0.00076969	0.0018504	0.0010616
88.4737	0.00017614	8.3715e-05	0.0043412	0.00068767	0.0013094	0.00094888
95.0273	8.6049e-05	7.5254e-05	0.0041556	0.00061926	0.00086049	0.00085482
101.581	0.00021782	6.8126e-05	0.0043207	0.00056148	0.0011567	0.00077533
108.135	0.0001245	6.2056e-05	0.0043365	0.00051217	0.0011115	0.00070745
114.688	0.00011317	5.6839e-05	0.0046436	0.00046967	0.00167	0.00064892
121.242	0.00011893	5.231e-05	0.0042567	0.00043274	0.00012017	0.00059805
127.796	6.9374e-05	4.8355e-05	0.0041491	0.00040041	0.001258	0.00055349
137.626	3.2451e-05	4.3284e-05	0.0043587	0.00035891	0.00046231	0.00049627
150.733	0.00020687	3.7786e-05	0.004165	0.00031375	0.0014921	0.00043397
163.84	0.00023254	3.3356e-05	0.0041392	0.00027733	0.0010283	0.0003837
176.948	8.0694e-05	2.9729e-05	0.0042319	0.00024745	0.00075025	0.00034244
190.055	0.00010417	2.6718e-05	0.0043054	0.00022257	5.5715e-05	0.00030807
203.162	0.00018306	2.4179e-05	0.0041358	0.0002016	0.0005915	0.0002791
216.269	8.9946e-05	2.2021e-05	0.0039732	0.00018373	0.00078955	0.0002544
229.377	0.00010104	2.0163e-05	0.0039834	0.00016835	0.0011396	0.00023313
242.484	-6.4657e-05	1.8555e-05	0.0039601	0.000155	0.00076139	0.00021468
255.591	-9.9572e-05	1.7149e-05	0.0038182	0.00014333	0.00042078	0.00019853
275.252	6.4515e-05	1.5347e-05	0.0041078	0.00012836	0.00015313	0.00017783
301.467	-5.4927e-05	1.3394e-05	0.0041502	0.0001121	0.00013616	0.00015533
327.681	-6.7731e-05	1.1821e-05	0.0040565	9.9008e-05	-7.0412e-05	0.00013721
353.896	1.5818e-05	1.0534e-05	0.0036741	8.8277e-05	0.00050169	0.00012235
380.11	-3.9006e-05	9.4651e-06	0.0036758	7.9354e-05	0.00088533	0.00011
406.325	-8.5979e-05	8.5652e-06	0.0038953	7.1839e-05	0.00066119	9.9589e-05
432.539	-7.9144e-06	7.7995e-06	0.0038053	6.544e-05	-0.0001452	9.0725e-05
458.754	4.3446e-05	7.1415e-06	0.0035619	5.9937e-05	-0.0006042	8.3102e-05
484.968	4.8465e-05	6.5704e-06	0.003441	5.5164e-05	-0.00026937	7.649e-05
511.183	0.0001273	6.0725e-06	0.0036459	5.0993e-05	0.00058613	7.0711e-05
550.504	-1.2246e-05	5.4338e-06	0.0035801	4.5649e-05	0.0002742	6.3305e-05
602.933	1.4103e-05	4.7417e-06	0.0036791	3.9847e-05	0.00084514	5.5263e-05
655.362	0.00010105	4.1844e-06	0.0034293	3.5177e-05	0.00044647	4.8791e-05
707.791	-3.4925e-06	3.7285e-06	0.0037049	3.1353e-05	-0.00059004	4.349e-05
760.22	1.7393e-05	3.35e-06	0.0036634	2.8175e-05	-0.00053924	3.9084e-05
812.649	0.0001103	3.0312e-06	0.0036813	2.55e-05	-9.1648e-05	3.5374e-05
865.078	3.9788e-05	2.7602e-06	0.0035584	2.3223e-05	0.00023287	3.2217e-05
917.507	1.4996e-06	--	0.0035153	2.1266e-05	-0.00021228	2.9503e-05
969.936	3.0138e-05	--	0.0034874	1.9569e-05	-0.00023113	2.7149e-05
1022.37	0.00019064	--	0.0034688	1.8086e-05	-0.00064279	2.5093e-05

## Sheet: Panel b
Lag time	ACF of Atto 655 (Blue curve)	Fit to data on column B	ACF of W171/C225 Atto moPrP (Red curve)	Fit to data on column D	ACF of Trp-less C225 Atto moPrP (Green curve)	Fit to data on column F
0.0001375	1.0211	0.9904	2.5833	2.3287	1.2074	1.1395
0.0001625	1.0203	0.99	2.6313	2.3245	1.1397	1.1359
0.0001875	1.0459	0.9895	2.4918	2.3203	1.1751	1.1323
0.0002125	1.0337	0.9891	2.2068	2.3161	1.0783	1.1289
0.0002375	0.9733	0.9887	2.3681	2.312	0.9717	1.1255
0.000275	1.0287	0.988	2.4301	2.3059	1.1239	1.1207
0.000325	0.9996	0.9872	2.265	2.2979	1.1418	1.1147
0.000375	0.9893	0.9863	2.1592	2.2901	1.1028	1.109
0.000425	0.9913	0.9855	2.3469	2.2825	1.1062	1.1037
0.000475	1.0174	0.9846	2.3682	2.275	1.0823	1.0987
0.000525	1.0088	0.9838	2.1831	2.2677	1.135	1.094
0.000575	0.9847	0.9829	2.2146	2.2605	1.1522	1.0896
0.000625	1.0085	0.9821	2.3406	2.2535	1.112	1.0855
0.000675	0.9882	0.9812	2.2264	2.2466	1.1217	1.0816
0.000725	1.0057	0.9804	2.337	2.2398	1.0768	1.0779
0.0008	0.9989	0.9791	2.2133	2.23	1.04	1.0728
0.0009	1.0088	0.9774	2.1665	2.2173	1.0488	1.0667
0.001	1.0116	0.9757	2.0943	2.2051	1.034	1.0612
0.0011	0.9861	0.9741	2.1604	2.1934	1.0893	1.0563
0.0012	0.9959	0.9724	2.2277	2.1821	1.0146	1.052
0.0013	0.9819	0.9708	2.3139	2.1713	1.0329	1.048
0.0014	0.9852	0.9691	2.0705	2.1609	1.0359	1.0444
0.0015	0.9891	0.9675	2.3074	2.1508	1.0287	1.0412
0.0016	1.0088	0.9658	2.1512	2.1412	1.0261	1.0382
0.0017	0.9837	0.9642	1.9801	2.1319	1.0519	1.0355
0.00185	0.9762	0.9617	2.1224	2.1186	1.0436	1.0318
0.00205	0.9783	0.9585	2.1245	2.1019	1.0274	1.0275
0.00225	0.969	0.9553	2.0612	2.0864	1.0158	1.0238
0.00245	0.9735	0.9521	2.027	2.0719	1.019	1.0205
0.00265	0.9694	0.9489	2.0629	2.0584	1.0137	1.0174
0.00285	0.9621	0.9457	2.055	2.0457	1.0318	1.0147
0.00305	0.9606	0.9426	2.0028	2.0337	1.0082	1.0121
0.00325	0.9406	0.9395	2.0874	2.0225	0.9991	1.0097
0.00345	0.9568	0.9364	1.8887	2.0119	1.017	1.0074
0.00365	0.9519	0.9333	2.0321	2.0019	1.0397	1.0053
0.00395	0.9435	0.9287	2.0233	1.9879	0.9967	1.0021
0.00435	0.9239	0.9227	2.0366	1.9708	1.0162	0.9982
0.00475	0.9385	0.9168	2.0102	1.9552	0.9894	0.9945
0.00515	0.9165	0.9109	1.9499	1.9409	0.9977	0.9909
0.00555	0.8975	0.9051	1.9332	1.9276	0.9844	0.9874
0.00595	0.9043	0.8993	1.8701	1.9152	0.9655	0.9841
0.00635	0.9099	0.8937	1.8774	1.9035	0.9706	0.9809
0.00675	0.8985	0.8881	1.8587	1.8924	0.9724	0.9778
0.00715	0.8874	0.8825	1.8944	1.8819	0.9728	0.9748
0.00755	0.8767	0.8771	1.884	1.8718	0.9833	0.9719
0.00815	0.8833	0.869	1.8624	1.8573	0.9591	0.9676
0.00895	0.8668	0.8585	1.8258	1.8391	0.9548	0.9622
0.00975	0.8548	0.8482	1.8671	1.8218	0.9688	0.9571
0.0106	0.8348	0.8381	1.774	1.8053	0.934	0.9522
0.0114	0.835	0.8283	1.8198	1.7893	0.9365	0.9475
0.0122	0.8196	0.8187	1.7727	1.7738	0.9446	0.9431
0.013	0.8083	0.8093	1.7871	1.7588	0.9433	0.9388
0.0138	0.7915	0.8002	1.7574	1.7442	0.9464	0.9346
0.0146	0.7898	0.7912	1.6681	1.7299	0.9409	0.9306
0.0154	0.7778	0.7824	1.6929	1.7159	0.9228	0.9268
0.0166	0.7702	0.7696	1.6567	1.6956	0.921	0.9212
0.0182	0.7485	0.7531	1.6767	1.6694	0.9205	0.9141
0.0198	0.7363	0.7373	1.648	1.6443	0.9135	0.9074
0.0214	0.721	0.7222	1.6212	1.6201	0.8976	0.901
0.023	0.7045	0.7076	1.6193	1.597	0.8856	0.8947
0.0246	0.6957	0.6936	1.5871	1.5746	0.8904	0.8887
0.0262	0.6778	0.6801	1.5546	1.5531	0.8853	0.8829
0.0278	0.6626	0.6672	1.539	1.5324	0.8834	0.8772
0.0294	0.648	0.6547	1.4857	1.5125	0.8775	0.8716
0.031	0.638	0.6426	1.5002	1.4932	0.8683	0.8662
0.0334	0.6179	0.6253	1.4571	1.4656	0.8615	0.8582
0.0366	0.5989	0.6036	1.4528	1.4309	0.8469	0.8478
0.0398	0.5768	0.5834	1.3858	1.3984	0.8426	0.8378
0.043	0.5578	0.5644	1.3557	1.3679	0.8304	0.828
0.0462	0.5417	0.5465	1.3365	1.3392	0.8118	0.8185
0.0494	0.5244	0.5298	1.3227	1.3122	0.8075	0.8092
0.0526	0.5072	0.514	1.3068	1.2867	0.8033	0.8001
0.0558	0.4904	0.499	1.264	1.2625	0.7813	0.7912
0.059	0.4807	0.4849	1.2643	1.2396	0.7808	0.7825
0.0622	0.4664	0.4716	1.2069	1.2177	0.7678	0.774
0.067	0.4472	0.4528	1.1828	1.1869	0.7649	0.7616
0.0734	0.4265	0.43	1.1463	1.1489	0.7421	0.7456
0.0798	0.4073	0.4092	1.1069	1.114	0.7283	0.7303
0.0862	0.3876	0.3903	1.0838	1.0817	0.712	0.7156
0.0926	0.3666	0.373	1.0581	1.0516	0.7018	0.7015
0.099	0.3547	0.3571	1.035	1.0235	0.6872	0.688
0.1054	0.339	0.3425	0.9825	0.9971	0.6728	0.6749
0.1118	0.3289	0.3289	0.9717	0.9722	0.6577	0.6624
0.1182	0.3133	0.3164	0.942	0.9487	0.65	0.6503
0.1246	0.301	0.3047	0.922	0.9264	0.6373	0.6387
0.1342	0.2879	0.2886	0.8956	0.8949	0.619	0.6221
0.147	0.2672	0.2696	0.8502	0.8563	0.6	0.6013
0.1598	0.2523	0.2528	0.8164	0.821	0.5819	0.5819
0.1726	0.2355	0.2378	0.7931	0.7886	0.5636	0.5638
0.1854	0.2226	0.2245	0.7539	0.7586	0.5461	0.5469
0.1982	0.212	0.2124	0.7313	0.7308	0.5342	0.5311
0.211	0.2016	0.2016	0.7039	0.705	0.523	0.5163
0.2238	0.1919	0.1917	0.688	0.681	0.506	0.5024
0.2366	0.1818	0.1827	0.647	0.6586	0.4888	0.4892
0.2494	0.1741	0.1745	0.6392	0.6377	0.4805	0.4769
0.2686	0.1641	0.1633	0.6047	0.6087	0.462	0.4596
0.2942	0.1505	0.1503	0.5757	0.574	0.4427	0.4387
0.3198	0.1385	0.1392	0.5463	0.5433	0.4245	0.4198
0.3454	0.1293	0.1294	0.5281	0.5158	0.406	0.4028
0.371	0.122	0.1208	0.4973	0.4912	0.3884	0.3872
0.3966	0.1148	0.1133	0.4712	0.469	0.3757	0.373
0.4222	0.1073	0.1065	0.4512	0.4488	0.3612	0.3598
0.4478	0.1028	0.1004	0.4298	0.4305	0.3469	0.3477
0.4734	0.096	0.095	0.4157	0.4137	0.34	0.3365
0.499	0.0908	0.09	0.4001	0.3983	0.3252	0.3261
0.5374	0.0845	0.0834	0.3788	0.3773	0.313	0.3117
0.5886	0.0774	0.0758	0.3543	0.3528	0.2924	0.2945
0.6398	0.071	0.0694	0.3319	0.3315	0.2797	0.2792
0.691	0.0656	0.0639	0.3167	0.3128	0.2649	0.2655
0.7422	0.06	0.0591	0.2968	0.2961	0.2509	0.2531
0.7934	0.0562	0.0549	0.2818	0.2812	0.2365	0.2419
0.8446	0.0531	0.0512	0.2641	0.2677	0.2269	0.2316
0.8958	0.0495	0.048	0.2575	0.2555	0.2185	0.2221
0.947	0.0468	0.045	0.2458	0.2443	0.2105	0.2134
0.9982	0.0438	0.0424	0.233	0.2341	0.2024	0.2053
1.075	0.0405	0.0389	0.2192	0.2202	0.1918	0.1942
1.1774	0.0365	0.035	0.1988	0.204	0.1778	0.1811
1.2798	0.0324	0.0317	0.1867	0.1899	0.1653	0.1696
1.3822	0.0299	0.0289	0.1757	0.1776	0.1568	0.1593
1.4846	0.0268	0.0265	0.1643	0.1666	0.1462	0.1502
1.587	0.0246	0.0245	0.1532	0.1569	0.1386	0.1421
1.6894	0.0232	0.0226	0.1457	0.1481	0.1315	0.1347
1.7918	0.0219	0.0211	0.1351	0.1403	0.1263	0.128
1.8942	0.0205	0.0196	0.1312	0.1331	0.1207	0.1219
1.9966	0.0192	0.0184	0.1253	0.1266	0.1137	0.1163
2.1502	0.0175	0.0167	0.1164	0.1179	0.1069	0.1087
2.355	0.016	0.0149	0.109	0.1078	0.0986	0.1
2.5598	0.0141	0.0134	0.0973	0.0992	0.0928	0.0924
2.7646	0.0126	0.0121	0.0891	0.0918	0.0869	0.0859
2.9694	0.0118	0.011	0.0818	0.0853	0.0809	0.0801
3.1742	0.0108	0.0101	0.0774	0.0796	0.0758	0.075
3.379	0.0103	0.0092929	0.0748	0.0745	0.0708	0.0705
3.5838	0.0096842	0.0085906	0.0689	0.07	0.0675	0.0664
3.7886	0.008852	0.0079726	0.0662	0.0659	0.0648	0.0628
3.9934	0.0090021	0.0074265	0.0623	0.0623	0.063	0.0595
4.3006	0.0071138	0.0067161	0.056	0.0574	0.0582	0.0551
4.7102	0.0063986	0.0059324	0.0522	0.0519	0.0527	0.05
5.1198	0.0061149	0.0052904	0.0464	0.0473	0.0483	0.0457
5.5294	0.0051458	0.0047568	0.0419	0.0433	0.0455	0.0421
5.939	0.0044667	0.0043078	0.0398	0.0399	0.0437	0.0389
6.3486	0.0045301	0.003925	0.0379	0.0369	0.0415	0.0361
6.7582	0.0043364	0.0035962	0.036	0.0343	0.0391	0.0336
7.1678	0.0038387	0.0033109	0.0328	0.032	0.038	0.0315
7.5774	0.0042056	0.0030614	0.0308	0.0299	0.0375	0.0295
7.987	0.0033445	0.0028421	0.0289	0.0281	0.0356	0.0278
8.6014	0.0029299	0.0025583	0.0268	0.0257	0.0333	0.0255
9.4206	0.0023514	0.0022477	0.0251	0.023	0.0295	0.0229
10.2398	0.0022672	0.0019951	0.0225	0.0207	0.0268	0.0207
11.059	0.0022521	0.0017866	0.0208	0.0188	0.0255	0.0189
11.8782	0.0020273	0.0016121	0.0179	0.0172	0.0218	0.0173
12.6974	0.0019359	0.0014643	0.019	0.0158	0.0198	0.016
13.5166	0.0015898	0.0013378	0.0169	0.0146	0.0183	0.0148
14.3358	0.0015287	0.0012285	0.016	0.0135	0.0166	0.0137
15.155	0.0015181	0.0011333	0.0158	0.0126	0.0168	0.0128
15.9742	0.0010721	0.0010499	0.0127	0.0117	0.0155	0.012
17.203	0.0015315	0.00094246	0.0136	0.0106	0.0134	0.0109
18.8414	0.0012248	0.00082534	0.0126	0.0094292	0.0124	0.0096837
20.4798	0.0010077	0.00073058	0.0109	0.008435	0.0116	0.0086896
22.1182	0.0012025	0.00065269	0.0099041	0.0076051	0.0094453	0.0078563
23.7566	0.00093339	0.00058771	0.0098527	0.0069037	0.0099484	0.0071494
25.3951	0.0007997	0.00053285	0.0076042	0.0063044	0.0088816	0.0065433
27.0335	0.00075513	0.00048603	0.0071191	0.0057875	0.0064605	0.006019
28.6719	0.00053752	0.00044569	0.0060989	0.0053378	0.0061107	0.0055616
30.3103	0.00041577	0.00041061	0.0058602	0.0049438	0.0064907	0.0051597
31.9487	0.00053245	0.00037992	0.0046861	0.0045961	0.0057438	0.0048042
34.4063	0.00037945	0.00034052	0.004902	0.0041459	0.0055042	0.0043427
37.6831	7.343e-05	0.00029766	0.0045323	0.0036507	0.0049197	0.0038334
40.9599	0.00040828	0.00026311	0.0040073	0.003247	0.0059599	0.0034168
44.2367	0.00043225	0.00023472	0.004637	0.0029128	0.0044763	0.0030708
47.5135	0.00025647	0.00021113	0.003478	0.0026323	0.0033446	0.0027796
50.7904	0.00033458	0.00019122	0.0026652	0.0023942	0.002684	0.0025318
54.0672	0.00019648	0.00017427	0.0035837	0.0021899	0.0035014	0.0023189
57.344	0.00017982	0.00015969	0.0021669	0.0020132	0.0024833	0.0021343
60.6208	0.00037291	0.000147	0.0027673	0.0018591	0.0019176	0.001973
63.8976	0.00023483	0.00013594	0.0022308	0.0017237	0.0011532	0.001831
68.8128	0.00033138	0.00012174	0.0028073	0.0015492	0.0017539	0.0016478
75.3665	0.00011342	0.00010632	0.0017147	0.0013585	0.0021703	0.0014471
81.9201	9.8402e-05	9.3895e-05	0.0015146	0.0012039	0.0016764	0.0012841
88.4737	0.00017614	8.3715e-05	0.0019179	0.0010766	0.00087734	0.0011496
95.0273	8.6049e-05	7.5254e-05	0.00081064	0.00097025	0.0018093	0.001037
101.581	0.00021782	6.8126e-05	0.0017714	0.00088034	0.0014368	0.00094175
108.135	0.0001245	6.2056e-05	0.00158	0.00080351	0.00044139	0.00086021
114.688	0.00011317	5.6839e-05	0.0015012	0.00073725	0.0012066	0.0007898
121.242	0.00011893	5.231e-05	0.00091343	0.00067962	0.00086843	0.00072851
127.796	6.9374e-05	4.8355e-05	0.0015446	0.00062913	0.00077916	0.00067475
137.626	3.2451e-05	4.3284e-05	0.0021247	0.00056426	0.00071695	0.00060562
150.733	0.00020687	3.7786e-05	0.0018501	0.00049359	0.00025409	0.00053022
163.84	0.00023254	3.3356e-05	0.0011457	0.00043654	0.0003357	0.00046927
176.948	8.0694e-05	2.9729e-05	0.00078142	0.00038969	0.00088051	0.00041916
190.055	0.00010417	2.6718e-05	0.00069596	0.00035066	-1.3507e-05	0.00037738
203.162	0.00018306	2.4179e-05	0.00022094	0.00031774	0.00020154	0.00034211
216.269	8.9946e-05	2.2021e-05	-0.00012063	0.00028967	-0.00012956	0.00031201
229.377	0.00010104	2.0163e-05	-0.00011179	0.0002655	-0.0004281	0.00028608
242.484	-6.4657e-05	1.8555e-05	0.00080368	0.00024451	0.00010185	0.00026355
255.591	-9.9572e-05	1.7149e-05	0.00040682	0.00022615	0.00014391	0.00024383
275.252	6.4515e-05	1.5347e-05	-7.1614e-05	0.0002026	-0.0010211	0.00021853
301.467	-5.4927e-05	1.3394e-05	0.00039998	0.000177	-0.00044427	0.000191
327.681	-6.7731e-05	1.1821e-05	0.00027296	0.00015637	-0.00011887	0.0001688
353.896	1.5818e-05	1.0534e-05	0.00014493	0.00013946	-9.217e-05	0.00015059
380.11	-3.9006e-05	9.4651e-06	-8.0119e-05	0.00012539	-9.3005e-05	0.00013544
406.325	-8.5979e-05	8.5652e-06	-0.00010755	0.00011354	-0.00085811	0.00012266
432.539	-7.9144e-06	7.7995e-06	0.00012596	0.00010344	-0.001022	0.00011178
458.754	4.3446e-05	7.1415e-06	0.0001593	9.4756e-05	-0.0010212	0.00010242
484.968	4.8465e-05	6.5704e-06	0.00046091	8.7223e-05	-0.00058909	9.4289e-05
511.183	0.0001273	6.0725e-06	0.00017857	8.0637e-05	-0.00043883	8.7183e-05
550.504	-1.2246e-05	5.4338e-06	0.00024215	7.2198e-05	-0.00089075	7.8074e-05
602.933	1.4103e-05	4.7417e-06	0.00041726	6.3032e-05	-0.0011391	6.8178e-05
655.362	0.00010105	4.1844e-06	-0.00019033	5.5654e-05	-0.0014083	6.0209e-05
707.791	-3.4925e-06	3.7285e-06	-0.00027574	4.9611e-05	-0.00084981	5.368e-05
760.22	1.7393e-05	3.35e-06	0.00039418	4.4587e-05	-0.00078322	4.8251e-05
812.649	0.0001103	3.0312e-06	2.7579e-05	4.0358e-05	-0.00082616	4.368e-05
865.078	3.9788e-05	2.7602e-06	-8.2743e-05	3.6757e-05	-0.00060326	3.9787e-05
917.507	1.4996e-06	--	0.00042237	3.3662e-05	-0.00089657	3.644e-05
969.936	3.0138e-05	--	0.00034631	3.0977e-05	-0.00017249	3.3537e-05
1022.37	0.00019064	--	-8.4704e-05	2.8632e-05	0.00054881	3.1e-05

## Sheet: Panel c
Wavelength	W144/C199-Atto moPrP (red)	Trp-less control protein C199-Atto moPrP (green)	W144/C199-Atto moPrP unfolde (red dashed, inset)	Trp-less control protein C199-Atto moPrP unfolded (green dashed, inset)
645	0.1408	0.4242	0.1403	0.1203
646	0.1569	0.4435	0.1161	0.102
647	0.1723	0.4948	0.1227	0.1101
648	0.1936	0.5567	0.1375	0.123
649	0.2144	0.6223	0.1529	0.1378
650	0.2447	0.6975	0.1694	0.1533
651	0.2725	0.7684	0.1894	0.1712
652	0.3028	0.8605	0.2133	0.189
653	0.3364	0.9443	0.2329	0.2104
654	0.3773	1.0617	0.2672	0.2383
655	0.4211	1.1771	0.2948	0.2668
656	0.4682	1.304	0.328	0.2949
657	0.5297	1.4477	0.3652	0.3256
658	0.5744	1.5751	0.4014	0.3641
659	0.6377	1.7267	0.4514	0.4012
660	0.701	1.9008	0.496	0.4474
661	0.7707	2.0517	0.5469	0.4907
662	0.8224	2.2225	0.5971	0.5372
663	0.8868	2.3937	0.6543	0.5849
664	0.9652	2.5818	0.7176	0.6423
665	1.0295	2.7738	0.7776	0.6957
666	1.0918	2.94	0.837	0.7483
667	1.1603	3.103	0.9036	0.8065
668	1.2188	3.2737	0.968	0.8592
669	1.2723	3.4144	1.0262	0.9109
670	1.3266	3.5269	1.084	0.9623
671	1.3678	3.6526	1.1357	1
672	1.4152	3.7421	1.1874	1.0459
673	1.4293	3.8279	1.2331	1.0812
674	1.4524	3.9029	1.2693	1.1121
675	1.4681	3.9339	1.3044	1.1267
676	1.4865	3.9402	1.329	1.1548
677	1.4784	3.9343	1.3433	1.1571
678	1.4663	3.9185	1.3569	1.1613
679	1.4504	3.8585	1.352	1.1555
680	1.4214	3.8069	1.3411	1.1477
681	1.4017	3.7273	1.3308	1.133
682	1.3682	3.6346	1.3096	1.1157
683	1.3266	3.546	1.2892	1.085
684	1.288	3.4041	1.2522	1.056
685	1.2354	3.3083	1.2157	1.0189
686	1.1952	3.1836	1.1711	0.9919
687	1.1534	3.0437	1.1345	0.9493
688	1.0972	2.9144	1.0961	0.914
689	1.0617	2.7945	1.0483	0.8751
690	1	2.6668	1	0.8378
691	0.9645	2.5583	0.9586	0.8016
692	0.9299	2.4464	0.9174	0.7665
693	0.8793	2.3277	0.8735	0.7298
694	0.843	2.2329	0.8374	0.6999
695	0.8065	2.134	0.7958	0.6674
696	0.7605	2.0269	0.7625	0.6338
697	0.7297	1.9569	0.7222	0.6055
698	0.7012	1.852	0.6904	0.5793
699	0.6753	1.7759	0.6579	0.552
700	0.635	1.7012	0.6285	0.529
701	0.6068	1.6215	0.6011	0.5055
702	0.5755	1.5508	0.5709	0.4788
703	0.5608	1.4861	0.5489	0.4587
704	0.5323	1.414	0.5258	0.4398
705	0.5126	1.3528	0.5003	0.4228
706	0.4884	1.2931	0.479	0.4023
707	0.46	1.2397	0.4601	0.3884
708	0.4463	1.1913	0.4394	0.3671
709	0.4197	1.1194	0.4194	0.3494
710	0.3977	1.0769	0.4001	0.3327
711	0.3853	1.0279	0.3769	0.3201
712	0.3627	0.9643	0.3623	0.3019
713	0.3478	0.929	0.3422	0.2886
714	0.3303	0.8822	0.3297	0.2767
715	0.3117	0.8469	0.3136	0.2628
716	0.3014	0.8021	0.2977	0.2469
717	0.2883	0.7729	0.2826	0.2371
718	0.2728	0.7363	0.2686	0.2258
719	0.2586	0.6986	0.2579	0.2158
720	0.2447	0.6666	0.2451	0.2048
721	0.2377	0.6307	0.2318	0.1945
722	0.2283	0.6103	0.2219	0.1845
723	0.2158	0.5803	0.2139	0.1767
724	0.2077	0.5527	0.2028	0.1691
725	0.194	0.5302	0.1942	0.1619
726	0.1863	0.5113	0.1856	0.1558
727	0.1871	0.4976	0.1774	0.148
728	0.1771	0.4741	0.1719	0.1429
729	0.1667	0.4622	0.1637	0.1372
730	0.163	0.4456	0.1574	0.1328

## Sheet: Panel D
Wavelength	W171/C225-Atto moPrP (red)	Trp-less control protein C225-Atto moPrP (green)	W171/C225-Atto moPrP unfolded (red dashed, inset)	Trp-less control protein C225-Atto moPrP unfolded (green dashed, inset)
645	0.2201	0.207	0.3643	0.1781
646	0.1732	0.202	0.1609	0.1319
647	0.1751	0.2244	0.1459	0.1356
648	0.1977	0.2485	0.1569	0.1547
649	0.2103	0.2734	0.1736	0.1676
650	0.2235	0.3116	0.1875	0.186
651	0.2486	0.3419	0.2128	0.2086
652	0.2795	0.3795	0.2319	0.2343
653	0.3025	0.428	0.252	0.2634
654	0.3316	0.4829	0.2919	0.2907
655	0.3685	0.5215	0.3205	0.3259
656	0.3994	0.5894	0.347	0.3666
657	0.4425	0.6576	0.3921	0.4038
658	0.4937	0.7205	0.4268	0.4522
659	0.5345	0.7945	0.4705	0.5037
660	0.5844	0.8736	0.5202	0.5511
661	0.6296	0.9528	0.5732	0.6019
662	0.6749	1.0369	0.6253	0.664
663	0.7416	1.1422	0.6879	0.7236
664	0.7905	1.2282	0.7444	0.8057
665	0.8479	1.3264	0.8161	0.8625
666	0.9165	1.4218	0.8816	0.9395
667	0.9618	1.5101	0.9548	0.9921
668	1.0139	1.6137	1.0072	1.0651
669	1.0707	1.7139	1.0623	1.1394
670	1.1337	1.8052	1.1263	1.193
671	1.1737	1.8759	1.1766	1.2534
672	1.2104	1.9501	1.2311	1.3003
673	1.2467	2.0244	1.2744	1.3413
674	1.2811	2.0736	1.2961	1.3841
675	1.3243	2.11	1.3223	1.4118
676	1.339	2.1493	1.3341	1.4319
677	1.3398	2.1839	1.363	1.4523
678	1.3527	2.1982	1.3662	1.4562
679	1.3819	2.1922	1.3512	1.4697
680	1.3458	2.1633	1.3608	1.4451
681	1.3303	2.1487	1.322	1.4338
682	1.3035	2.1314	1.3029	1.4076
683	1.2713	2.0877	1.2787	1.3675
684	1.2639	2.0229	1.2401	1.331
685	1.2086	1.9664	1.1958	1.2916
686	1.1815	1.912	1.1578	1.2597
687	1.1329	1.8332	1.1198	1.2001
688	1.0794	1.78	1.0832	1.1652
689	1.0514	1.6955	1.0388	1.1104
690	1	1.6181	1	1.0599
691	0.9591	1.5636	0.9415	1.0153
692	0.9329	1.4918	0.904	0.974
693	0.8882	1.4304	0.8664	0.9182
694	0.841	1.3623	0.8262	0.8854
695	0.8065	1.2959	0.7966	0.845
696	0.7768	1.2301	0.764	0.8072
697	0.7277	1.1774	0.7222	0.7688
698	0.7184	1.1235	0.688	0.7285
699	0.6686	1.0671	0.6602	0.6996
700	0.6468	1.0247	0.6274	0.6668
701	0.6285	0.976	0.5966	0.6389
702	0.5913	0.9325	0.5716	0.608
703	0.5653	0.8979	0.55	0.583
704	0.5471	0.8417	0.5232	0.5543
705	0.5234	0.8108	0.494	0.5343
706	0.5065	0.7794	0.4779	0.5104
707	0.4796	0.7438	0.4596	0.4859
708	0.4666	0.7073	0.4455	0.4668
709	0.4515	0.6746	0.4249	0.4425
710	0.4215	0.6449	0.3999	0.4198
711	0.4081	0.6196	0.3822	0.4035
712	0.3928	0.5896	0.3692	0.3884
713	0.3789	0.5632	0.3511	0.3624
714	0.3609	0.537	0.3359	0.3452
715	0.3321	0.5094	0.3169	0.3288
716	0.329	0.4872	0.3016	0.3136
717	0.3116	0.4615	0.2924	0.2959
718	0.3019	0.4456	0.2797	0.2842
719	0.2927	0.4181	0.2621	0.2683
720	0.2749	0.3999	0.2491	0.2569
721	0.2626	0.3792	0.2419	0.245
722	0.2599	0.3679	0.2262	0.2363
723	0.2445	0.3439	0.2183	0.2231
724	0.2374	0.3324	0.2084	0.2142
725	0.2287	0.3202	0.2042	0.207
726	0.221	0.3052	0.1885	0.1965
727	0.2162	0.291	0.1854	0.188
728	0.2137	0.2853	0.1762	0.1803
729	0.2044	0.271	0.1771	0.1738
730	0.1934	0.2584	0.1644	0.167
