# Supplementary material for: Microsecond sub-domain motions and the folding and misfolding of the mouse prion protein
Source: eLife. 2019 Apr 26;8:e44766. doi: 10.7554/eLife.44766 (PMC6516828; doi:10.7554/eLife.44766)
Supplement: Figure 3—figure supplement 1—source data 1. [file elife-44766-fig3-figsupp1-data1.xlsx]

## Sheet: Panel a
Time in microseconds	Red curve	Fit to red curve (Black line)	Blue curve (Residuals)
-588.12	--	1.9467	--
-584.64	--	1.9376	--
-581.16	--	1.9286	--
-577.68	--	1.9197	--
-574.2	--	1.9108	--
-570.72	--	1.9019	--
-567.24	--	1.8931	--
-563.76	--	1.8844	--
-560.28	--	1.8757	--
-556.8	--	1.8671	--
-553.32	--	1.8585	--
-549.84	--	1.8499	--
-546.36	--	1.8415	--
-542.88	--	1.833	--
-539.4	--	1.8247	--
-535.92	--	1.8163	--
-532.44	--	1.808	--
-528.96	--	1.7998	--
-525.48	--	1.7916	--
-522	--	1.7835	--
-518.52	--	1.7754	--
-515.04	--	1.7674	--
-511.56	--	1.7594	--
-508.08	--	1.7514	--
-504.6	--	1.7435	--
-501.12	--	1.7357	--
-497.64	--	1.7279	--
-494.16	--	1.7201	--
-490.68	--	1.7124	--
-487.2	--	1.7047	--
-483.72	--	1.6971	--
-480.24	--	1.6895	--
-476.76	--	1.682	--
-473.28	--	1.6745	--
-469.8	--	1.6671	--
-466.32	--	1.6597	--
-462.84	--	1.6523	--
-459.36	--	1.645	--
-455.88	--	1.6378	--
-452.4	--	1.6305	--
-448.92	--	1.6234	--
-445.44	--	1.6162	--
-441.96	--	1.6091	--
-438.48	--	1.6021	--
-435	--	1.5951	--
-431.52	--	1.5881	--
-428.04	--	1.5812	--
-424.56	--	1.5743	--
-421.08	--	1.5675	--
-417.6	--	1.5606	--
-414.12	--	1.5539	--
-410.64	--	1.5472	--
-407.16	--	1.5405	--
-403.68	--	1.5338	--
-400.2	--	1.5272	--
-396.72	--	1.5207	--
-393.24	--	1.5141	--
-389.76	--	1.5077	--
-386.28	--	1.5012	--
-382.8	--	1.4948	--
-379.32	--	1.4884	--
-375.84	--	1.4821	--
-372.36	--	1.4758	--
-368.88	--	1.4695	--
-365.4	--	1.4633	--
-361.92	--	1.4571	--
-358.44	--	1.451	--
-354.96	--	1.4449	--
-351.48	--	1.4388	--
-348	--	1.4328	--
-344.52	--	1.4267	--
-341.04	--	1.4208	--
-337.56	--	1.4148	--
-334.08	--	1.409	--
-330.6	--	1.4031	--
-327.12	--	1.3973	--
-323.64	--	1.3915	--
-320.16	--	1.3857	--
-316.68	--	1.38	--
-313.2	--	1.3743	--
-309.72	--	1.3686	--
-306.24	--	1.363	--
-302.76	--	1.3574	--
-299.28	--	1.3519	--
-295.8	--	1.3464	--
-292.32	--	1.3409	--
-288.84	--	1.3354	--
-285.36	--	1.33	--
-281.88	--	1.3246	--
-278.4	--	1.3192	--
-274.92	--	1.3139	--
-271.44	--	1.3086	--
-267.96	--	1.3033	--
-264.48	--	1.2981	--
-261	--	1.2929	--
-257.52	--	1.2877	--
-254.04	--	1.2826	--
-250.56	--	1.2775	--
-247.08	--	1.2724	--
-243.6	--	1.2673	--
-240.12	--	1.2623	--
-236.64	--	1.2573	--
-233.16	--	1.2524	--
-229.68	--	1.2474	--
-226.2	--	1.2425	--
-222.72	--	1.2377	--
-219.24	--	1.2328	--
-215.76	--	1.228	--
-212.28	--	1.2232	--
-208.8	--	1.2185	--
-205.32	--	1.2137	--
-201.84	--	1.209	--
-198.36	--	1.2044	--
-194.88	--	1.1997	--
-191.4	--	1.1951	--
-187.92	--	1.1905	--
-184.44	--	1.1859	--
-180.96	--	1.1814	--
-177.48	--	1.1769	--
-174	--	1.1724	--
-170.52	--	1.1679	--
-167.04	--	1.1635	--
-163.56	--	1.1591	--
-160.08	--	1.1547	--
-156.6	--	1.1504	--
-153.12	--	1.1461	--
-149.64	--	1.1418	--
-146.16	--	1.1375	--
-142.68	--	1.1332	--
-139.2	--	1.129	--
-135.72	--	1.1248	--
-132.24	--	1.1206	--
-128.76	--	1.1165	--
-125.28	--	1.1124	--
-121.8	--	1.1083	--
-118.32	--	1.1042	--
-114.84	--	1.1001	--
-111.36	--	1.0961	--
-107.88	--	1.0921	--
-104.4	--	1.0881	--
-100.92	--	1.0842	--
-97.44	--	1.0802	--
-93.96	--	1.0763	--
-90.48	--	1.0725	--
-87	--	1.0686	--
-83.52	--	1.0647	--
-80.04	--	1.0609	--
-76.56	--	1.0571	--
-73.08	--	1.0534	--
-69.6	--	1.0496	--
-66.12	--	1.0459	--
-62.64	--	1.0422	--
-59.16	--	1.0385	--
-55.68	--	1.0348	--
-52.2	--	1.0312	--
-48.72	--	1.0276	--
-45.24	--	1.024	--
-41.76	--	1.0204	--
-38.28	--	1.0169	--
-34.8	--	1.0133	--
-31.32	--	1.0098	--
-27.84	--	1.0063	--
-24.36	--	1.0029	--
-20.88	--	0.9994	--
-17.4	--	0.996	--
-13.92	--	0.9926	--
-10.44	--	0.9892	--
-6.96	--	0.9858	--
-3.48	--	0.9825	--
0	--	0.9791	--
3.48	--	0.9758	--
6.96	--	0.9725	--
10.44	--	0.9693	--
13.92	--	0.966	--
17.4	--	0.9628	--
20.88	--	0.9596	--
24.36	--	0.9564	--
27.84	--	0.9532	--
31.32	--	0.9501	--
34.8	--	0.9469	--
38.28	--	0.9438	--
41.76	--	0.9407	--
45.24	--	0.9376	--
48.72	--	0.9346	--
52.2	--	0.9315	--
55.68	--	0.9285	--
59.16	--	0.9255	--
62.64	--	0.9225	--
66.12	0.9292	0.9195	0.009702
69.6	0.9326	0.9166	0.016
73.08	0.9354	0.9137	0.0217
76.56	0.9473	0.9107	0.0366
80.04	0.9634	0.9078	0.0555
83.52	0.9299	0.9049	0.0249
87	0.9085	0.9021	0.006374
90.48	0.9051	0.8992	0.0058735
93.96	0.9396	0.8964	0.0432
97.44	0.9127	0.8936	0.0191
100.92	0.8969	0.8908	0.0061661
104.4	0.9278	0.888	0.0398
107.88	0.8948	0.8852	0.009532
111.36	0.8808	0.8825	-0.0016844
114.84	0.9028	0.8797	0.023
118.32	0.8839	0.877	0.006862
121.8	0.8968	0.8743	0.0225
125.28	0.8649	0.8716	-0.0067109
128.76	0.8574	0.869	-0.0116
132.24	0.8677	0.8663	0.0013711
135.72	0.8643	0.8637	0.00063736
139.2	0.8726	0.8611	0.0115
142.68	0.8875	0.8585	0.029
146.16	0.8444	0.8559	-0.0115
149.64	0.8576	0.8533	0.0042813
153.12	0.8652	0.8507	0.0145
156.6	0.8437	0.8482	-0.0044427
160.08	0.8455	0.8457	-0.00020056
163.56	0.8349	0.8431	-0.0081915
167.04	0.8566	0.8406	0.016
170.52	0.8253	0.8382	-0.0128
174	0.8308	0.8357	-0.0048938
177.48	0.8161	0.8332	-0.0172
180.96	0.8283	0.8308	-0.0024903
184.44	0.8328	0.8284	0.004447
187.92	0.8151	0.826	-0.0109
191.4	0.8135	0.8236	-0.0101
194.88	0.8239	0.8212	0.0027759
198.36	0.805	0.8188	-0.0138
201.84	0.8409	0.8164	0.0244
205.32	0.8378	0.8141	0.0237
208.8	0.8062	0.8118	-0.0056135
212.28	0.7983	0.8095	-0.0112
215.76	0.7833	0.8072	-0.0239
219.24	0.7895	0.8049	-0.0154
222.72	0.8012	0.8026	-0.0013778
226.2	0.7928	0.8003	-0.007522
229.68	0.8136	0.7981	0.0155
233.16	0.7852	0.7959	-0.0107
236.64	0.7957	0.7936	0.0020129
240.12	0.8114	0.7914	0.02
243.6	0.7902	0.7893	0.00098142
247.08	0.7908	0.7871	0.0037206
250.56	0.7797	0.7849	-0.0051827
254.04	0.7776	0.7828	-0.0051806
257.52	0.782	0.7806	0.0013439
261	0.7529	0.7785	-0.0256
264.48	0.7689	0.7764	-0.007486
267.96	0.7614	0.7743	-0.0128
271.44	0.7616	0.7722	-0.0106
274.92	0.7694	0.7701	-0.00070619
278.4	0.7699	0.768	0.0018646
281.88	0.7738	0.766	0.0077899
285.36	0.7619	0.7639	-0.0020113
288.84	0.7707	0.7619	0.0087561
292.32	0.7493	0.7599	-0.0106
295.8	0.7722	0.7579	0.0143
299.28	0.7524	0.7559	-0.0034784
302.76	0.7638	0.7539	0.0098872
306.24	0.725	0.7519	-0.0269
309.72	0.7491	0.75	-0.00090257
313.2	0.7569	0.748	0.0088316
316.68	0.753	0.7461	0.0069487
320.16	0.7261	0.7442	-0.018
323.64	0.7184	0.7423	-0.0239
327.12	0.7504	0.7404	0.01
330.6	0.741	0.7385	0.0025337
334.08	0.7177	0.7366	-0.0189
337.56	0.7333	0.7347	-0.0013921
341.04	0.7348	0.7329	0.0019596
344.52	0.7365	0.731	0.0054533
348	0.7369	0.7292	0.0077497
351.48	0.7273	0.7274	-0.00011838
354.96	0.7204	0.7256	-0.0051959
358.44	0.7222	0.7238	-0.0015766
361.92	0.6944	0.722	-0.0276
365.4	0.6962	0.7202	-0.024
368.88	0.7087	0.7184	-0.0097413
372.36	0.7174	0.7167	0.00072701
375.84	0.7026	0.7149	-0.0123
379.32	0.6957	0.7132	-0.0174
382.8	0.7048	0.7114	-0.0066015
386.28	0.6962	0.7097	-0.0136
389.76	0.6872	0.708	-0.0208
393.24	0.6754	0.7063	-0.031
396.72	0.6874	0.7046	-0.0173
400.2	0.679	0.703	-0.024
403.68	0.6982	0.7013	-0.0030784
407.16	0.6961	0.6996	-0.0035396
410.64	0.6952	0.698	-0.0027893
414.12	0.6711	0.6964	-0.0253
417.6	0.6679	0.6947	-0.0268
421.08	0.6788	0.6931	-0.0143
424.56	0.6838	0.6915	-0.0076695
428.04	0.6661	0.6899	-0.0238
431.52	0.6699	0.6883	-0.0184
435	0.6794	0.6867	-0.007312
438.48	0.6617	0.6852	-0.0234
441.96	0.6664	0.6836	-0.0172
445.44	0.6871	0.682	0.0050891
448.92	0.6639	0.6805	-0.0166
452.4	0.6595	0.679	-0.0195
455.88	0.6739	0.6774	-0.0035428
459.36	0.6867	0.6759	0.0108
462.84	0.6735	0.6744	-0.00093475
466.32	0.6745	0.6729	0.0015841
469.8	0.6618	0.6714	-0.00967
473.28	0.6711	0.67	0.0011282
476.76	0.6625	0.6685	-0.0059594
480.24	0.6587	0.667	-0.0083781
483.72	0.6515	0.6656	-0.0141
487.2	0.6498	0.6641	-0.0143
490.68	0.6496	0.6627	-0.0131
494.16	0.6501	0.6613	-0.0112
497.64	0.6252	0.6598	-0.0346
501.12	0.6623	0.6584	0.0039079
504.6	0.6551	0.657	-0.0019723
508.08	0.6513	0.6556	-0.0042962
511.56	0.6479	0.6543	-0.0063188
515.04	0.6349	0.6529	-0.018
518.52	0.6405	0.6515	-0.011
522	0.6323	0.6501	-0.0179
525.48	0.6382	0.6488	-0.0106
528.96	0.6443	0.6474	-0.0031033
532.44	0.6418	0.6461	-0.0043015
535.92	0.648	0.6448	0.0031747
539.4	0.6396	0.6435	-0.0038774
542.88	0.6371	0.6421	-0.0050542
546.36	0.6543	0.6408	0.0134
549.84	0.6488	0.6395	0.0093045
553.32	0.6404	0.6383	0.0021691
556.8	0.627	0.637	-0.01
560.28	0.6396	0.6357	0.003941
563.76	0.632	0.6344	-0.0024305
567.24	0.6367	0.6332	0.0034917
570.72	0.6412	0.6319	0.0092594
574.2	0.6286	0.6307	-0.0020577
577.68	0.6273	0.6294	-0.0021823
581.16	0.6226	0.6282	-0.005561
584.64	0.6268	0.627	-0.00018528
588.12	0.6211	0.6258	-0.0046523
591.6	0.6168	0.6246	-0.0077833
595.08	0.6235	0.6234	0.00016071
598.56	0.6164	0.6222	-0.0057627
602.04	0.6123	0.621	-0.0086596
605.52	0.6126	0.6198	-0.0071576
609	0.6115	0.6186	-0.0070826
612.48	0.6034	0.6175	-0.0141
615.96	0.6127	0.6163	-0.0035898
619.44	0.6008	0.6151	-0.0144
622.92	0.6191	0.614	0.0051151
626.4	0.6036	0.6129	-0.0092983
629.88	0.6121	0.6117	0.00034027
633.36	0.6146	0.6106	0.0039524
636.84	0.5969	0.6095	-0.0126
640.32	0.6058	0.6084	-0.002579
643.8	0.6066	0.6073	-0.00063127
647.28	0.61	0.6062	0.0038518
650.76	0.6041	0.6051	-0.00096252
654.24	0.6033	0.604	-0.00074529
657.72	0.601	0.6029	-0.0018955
661.2	0.6015	0.6018	-0.00038805
664.68	0.6055	0.6008	0.0047623
668.16	0.5979	0.5997	-0.0017872
671.64	0.5935	0.5987	-0.0051931
675.12	0.5874	0.5976	-0.0103
678.6	0.5792	0.5966	-0.0174
682.08	0.584	0.5955	-0.0115
685.56	0.5903	0.5945	-0.0042061
689.04	0.5892	0.5935	-0.004345
692.52	0.5861	0.5925	-0.0064242
696	0.5746	0.5915	-0.0168
699.48	0.588	0.5905	-0.0024682
702.96	0.579	0.5895	-0.0105
706.44	0.5853	0.5885	-0.0031341
709.92	0.5846	0.5875	-0.0028851
713.4	0.5915	0.5865	0.0050169
716.88	0.5761	0.5855	-0.0093852
720.36	0.58	0.5846	-0.0045167
723.84	0.588	0.5836	0.0044236
727.32	0.5786	0.5826	-0.0039963
730.8	0.5793	0.5817	-0.0023985
734.28	0.5785	0.5807	-0.0021964
737.76	0.5781	0.5798	-0.001724
741.24	0.5719	0.5789	-0.006991
744.72	0.5605	0.5779	-0.0174
748.2	0.5741	0.577	-0.0029017
751.68	0.568	0.5761	-0.0081081
755.16	0.5692	0.5752	-0.0060278
758.64	0.5786	0.5743	0.0043534
762.12	0.5748	0.5734	0.0013971
765.6	0.5678	0.5725	-0.0046327
769.08	0.5662	0.5716	-0.0053888
772.56	0.5623	0.5707	-0.0083875
776.04	0.5706	0.5698	0.00078802
779.52	0.5669	0.5689	-0.0020602
783	0.5791	0.5681	0.011
786.48	0.5705	0.5672	0.0033407
789.96	0.5748	0.5663	0.0084534
793.44	0.5757	0.5655	0.0103
796.92	0.5651	0.5646	0.00050532
800.4	0.5548	0.5638	-0.0090293
803.88	0.5562	0.563	-0.0067951
807.36	0.5607	0.5621	-0.0014044
810.84	0.5507	0.5613	-0.0106
814.32	0.5546	0.5605	-0.0058569
817.8	0.5587	0.5596	-0.00096545
821.28	0.5531	0.5588	-0.0057687
824.76	0.5536	0.558	-0.0043693
828.24	0.5506	0.5572	-0.0066404
831.72	0.5546	0.5564	-0.001789
835.2	0.5593	0.5556	0.0037054
838.68	0.5492	0.5548	-0.005623
842.16	0.5571	0.554	0.0030182
845.64	0.5561	0.5533	0.0028895
849.12	0.5458	0.5525	-0.0067197
852.6	0.5541	0.5517	0.0024434
856.08	0.5548	0.5509	0.0038872
859.56	0.5519	0.5502	0.0017039
863.04	0.5502	0.5494	0.0008203
866.52	0.5434	0.5487	-0.0052237
870	0.5441	0.5479	-0.0038598
873.48	0.5454	0.5472	-0.001768
876.96	0.5468	0.5464	0.00038536
880.44	0.5432	0.5457	-0.002439
883.92	0.5398	0.545	-0.0051827
887.4	0.5373	0.5442	-0.006939
890.88	0.5516	0.5435	0.0080857
894.36	0.5453	0.5428	0.0024858
897.84	0.5542	0.5421	0.0121
901.32	0.5456	0.5414	0.004276
904.8	0.545	0.5407	0.00433
908.28	0.5496	0.5399	0.0096966
911.76	0.5418	0.5393	0.0025342
915.24	0.5422	0.5386	0.0036034
918.72	0.5373	0.5379	-0.00060918
922.2	0.5404	0.5372	0.0032524
925.68	0.5403	0.5365	0.0037753
929.16	0.5375	0.5358	0.0016562
932.64	0.5383	0.5351	0.0031143
936.12	0.5457	0.5345	0.0112
939.6	0.5332	0.5338	-0.00056663
943.08	0.5299	0.5332	-0.0032486
946.56	0.5274	0.5325	-0.0051231
950.04	0.5296	0.5318	-0.0021905
953.52	0.5359	0.5312	0.0046964
957	0.5291	0.5305	-0.0014076
960.48	0.5302	0.5299	0.00031369
963.96	0.5301	0.5293	0.00085715
967.44	0.5268	0.5286	-0.0018365
970.92	0.5335	0.528	0.00553
974.4	0.5325	0.5274	0.005108
977.88	0.5313	0.5267	0.0045707
981.36	0.5307	0.5261	0.0046062
984.84	0.5153	0.5255	-0.0102
988.32	0.5211	0.5249	-0.0038354
991.8	0.53	0.5243	0.0057174
995.28	0.519	0.5237	-0.0046384
998.76	0.5279	0.5231	0.0048232
1002.24	0.5223	0.5225	-0.00023028
1005.72	0.5264	0.5219	0.0044973
1009.2	0.5258	0.5213	0.0045049
1012.68	0.5248	0.5207	0.0040834
1016.16	0.52	0.5201	-8.5667e-05
1019.64	0.5201	0.5195	0.0005566
1023.12	0.5213	0.519	0.0023654
1026.6	0.5264	0.5184	0.0080149
1030.08	0.527	0.5178	0.0092004
1033.56	0.5205	0.5173	0.0032628
1037.04	0.5234	0.5167	0.0066891
1040.52	0.5181	0.5161	0.001933
1044	0.5224	0.5156	0.0067917
1047.48	0.5179	0.515	0.002827
1050.96	0.5164	0.5145	0.001926
1054.44	0.5183	0.5139	0.0044201
1057.92	0.5123	0.5134	-0.0010896
1061.4	0.5218	0.5128	0.0089126
1064.88	0.5142	0.5123	0.0018817
1068.36	0.5173	0.5118	0.0055634
1071.84	0.51	0.5112	-0.0012848
1075.32	0.5197	0.5107	0.0089796
1078.8	0.5127	0.5102	0.0025484
1082.28	0.5117	0.5097	0.0020589
1085.76	0.5103	0.5091	0.0011897
1089.24	0.5138	0.5086	0.0051235
1092.72	0.5156	0.5081	0.0075245
1096.2	0.5116	0.5076	0.0040055
1099.68	0.5112	0.5071	0.0041131
1103.16	0.5157	0.5066	0.0090582
1106.64	0.5115	0.5061	0.0053712
1110.12	0.5114	0.5056	0.0057787
1113.6	0.5106	0.5051	0.0055
1117.08	0.5092	0.5046	0.0046173
1120.56	0.5043	0.5041	0.0001355
1124.04	0.5046	0.5036	0.0010013
1127.52	0.5056	0.5032	0.002434
1131	0.5126	0.5027	0.0098749
1134.48	0.5038	0.5022	0.0015658
1137.96	0.5097	0.5017	0.0079776
1141.44	0.5035	0.5013	0.0021872
1144.92	0.5062	0.5008	0.0053649
1148.4	0.5032	0.5003	0.0029134
1151.88	0.5065	0.4999	0.0066525
1155.36	0.5047	0.4994	0.0052997
1158.84	0.5029	0.4989	0.0039259
1162.32	0.4977	0.4985	-0.00078835
1165.8	0.4972	0.498	-0.00088538
1169.28	0.5075	0.4976	0.0098843
1172.76	0.4999	0.4971	0.0027698
1176.24	0.4958	0.4967	-0.00089516
1179.72	0.4941	0.4963	-0.0021322
1183.2	0.5026	0.4958	0.0068017
1186.68	0.4974	0.4954	0.0020244
1190.16	0.507	0.495	0.0121
1193.64	0.4994	0.4945	0.0049249
1197.12	0.5023	0.4941	0.0081655
1200.6	0.4982	0.4937	0.0045518
1204.08	0.493	0.4932	-0.00020341
1207.56	0.4961	0.4928	0.0032285
1211.04	0.5024	0.4924	0.01
1214.52	0.4843	0.492	-0.0076419
1218	0.4951	0.4916	0.0035368
1221.48	0.4914	0.4912	0.00027083
1224.96	0.4958	0.4908	0.0050502
1228.44	0.498	0.4904	0.0076466
1231.92	0.4943	0.4899	0.0043826
1235.4	0.494	0.4895	0.0044648
1238.88	0.4929	0.4891	0.0037235
1242.36	0.492	0.4888	0.0031993
1245.84	0.4894	0.4884	0.00099323
1249.32	0.4896	0.488	0.0016773
1252.8	0.4926	0.4876	0.0050073
1256.28	0.4932	0.4872	0.0060067
1259.76	0.4916	0.4868	0.0048241
1263.24	0.4924	0.4864	0.0059869
1266.72	0.4934	0.486	0.0073279
1270.2	0.492	0.4857	0.006334
1273.68	0.4884	0.4853	0.0031422
1277.16	0.484	0.4849	-0.00088758
1280.64	0.4883	0.4845	0.0037471
1284.12	0.4908	0.4842	0.0065806
1287.6	0.4825	0.4838	-0.0013117
1291.08	0.4898	0.4834	0.0063098
1294.56	0.4899	0.4831	0.0067849
1298.04	0.4856	0.4827	0.0029041
1301.52	0.485	0.4824	0.0025935
1305	0.4858	0.482	0.0038346
1308.48	0.4794	0.4817	-0.0022313
1311.96	0.4866	0.4813	0.0052622
1315.44	0.4851	0.481	0.0041286
1318.92	0.4865	0.4806	0.0058848
1322.4	0.4863	0.4803	0.0060657
1325.88	0.4897	0.4799	0.009792
1329.36	0.4799	0.4796	0.00034143
1332.84	0.4886	0.4792	0.0093284
1336.32	0.4808	0.4789	0.0019223
1339.8	0.484	0.4786	0.0053953
1343.28	0.4786	0.4782	0.00040552
1346.76	0.488	0.4779	0.0101
1350.24	0.4882	0.4776	0.0106
1353.72	0.4839	0.4772	0.0066275
1357.2	0.4814	0.4769	0.00446
1360.68	0.4869	0.4766	0.0103
1364.16	0.4833	0.4763	0.0070415
1367.64	0.477	0.4759	0.0010038
1371.12	0.4857	0.4756	0.0101
1374.6	0.4862	0.4753	0.0109
1378.08	0.482	0.475	0.0069838
1381.56	0.4756	0.4747	0.0009081
1385.04	0.4787	0.4744	0.0043448
1388.52	0.4767	0.4741	0.0026285
1392	0.4797	0.4738	0.0059886
1395.48	0.4765	0.4735	0.0030703
1398.96	0.4851	0.4732	0.012
1402.44	0.479	0.4729	0.0061697
1405.92	0.4798	0.4726	0.0072405
1409.4	0.4777	0.4723	0.0054945
1412.88	0.4746	0.472	0.0026805
1416.36	0.4796	0.4717	0.0079357
1419.84	0.475	0.4714	0.003631
1423.32	0.4778	0.4711	0.0066709
1426.8	0.4771	0.4708	0.0063266
1430.28	0.4753	0.4705	0.0047522
1433.76	0.4777	0.4702	0.007495
1437.24	0.4823	0.4699	0.0124
1440.72	0.4781	0.4697	0.0084794
1444.2	0.4792	0.4694	0.0098711
1447.68	0.4703	0.4691	0.0012002
1451.16	0.4751	0.4688	0.0062781
1454.64	0.4776	0.4685	0.0090604
1458.12	0.4799	0.4683	0.0117
1461.6	0.4742	0.468	0.0062549
1465.08	0.4688	0.4677	0.0011179
1468.56	0.4719	0.4675	0.0044117
1472.04	0.4719	0.4672	0.0047495
1475.52	0.4726	0.4669	0.0057263
1479	0.4695	0.4667	0.0028765
1482.48	0.4696	0.4664	0.0032247
1485.96	0.4656	0.4661	-0.0005617
1489.44	0.4697	0.4659	0.0038501
1492.92	0.4685	0.4656	0.0028951
1496.4	0.4707	0.4654	0.0053126
1499.88	0.4701	0.4651	0.0050082
1503.36	0.4693	0.4648	0.004453
1506.84	0.4687	0.4646	0.0040689
1510.32	0.47	0.4643	0.0056786
1513.8	0.4726	0.4641	0.0085423
1517.28	0.4689	0.4639	0.0050167
1520.76	0.4637	0.4636	0.0001001
1524.24	0.472	0.4634	0.0086633
1527.72	0.4696	0.4631	0.0064618
1531.2	0.4707	0.4629	0.0078179
1534.68	0.4721	0.4626	0.0094804
1538.16	0.4716	0.4624	0.0092179
1541.64	0.4668	0.4622	0.0046097
1545.12	0.4678	0.4619	0.0058472
1548.6	0.4677	0.4617	0.0059933
1552.08	0.4688	0.4615	0.0073719
1555.56	0.471	0.4612	0.0098221
1559.04	0.4675	0.461	0.0064773
1562.52	0.4686	0.4608	0.0078818
1566	0.4743	0.4605	0.0138
1569.48	0.4688	0.4603	0.0085087
1572.96	0.4669	0.4601	0.0068481
1576.44	0.4656	0.4599	0.0057688
1579.92	0.4673	0.4596	0.0076204
1583.4	0.4675	0.4594	0.008034
1586.88	0.4662	0.4592	0.0069753
1590.36	0.4674	0.459	0.0084248
1593.84	0.4721	0.4588	0.0134
1597.32	0.4682	0.4585	0.0096794
1600.8	0.4652	0.4583	0.0068249
1604.28	0.467	0.4581	0.0088642
1607.76	0.467	0.4579	0.0090864
1611.24	0.4632	0.4577	0.0054648
1614.72	0.4694	0.4575	0.0119
1618.2	0.4675	0.4573	0.0102
1621.68	0.4589	0.4571	0.0017867
1625.16	0.4581	0.4569	0.0012636
1628.64	0.4609	0.4567	0.0042108
1632.12	0.4571	0.4565	0.00068038
1635.6	0.4596	0.4563	0.0033771
1639.08	0.4627	0.4561	0.006613
1642.56	0.457	0.4559	0.0011445
1646.04	0.4606	0.4557	0.0049825
1649.52	0.4645	0.4555	0.0090151
1653	0.4617	0.4553	0.0063965
1656.48	0.467	0.4551	0.0119
1659.96	0.4584	0.4549	0.003501
1663.44	0.4567	0.4547	0.0020013
1666.92	0.4604	0.4545	0.005947
1670.4	0.4622	0.4543	0.0078657
1673.88	0.4591	0.4541	0.0049417
1677.36	0.4582	0.4539	0.0043075
1680.84	0.457	0.4537	0.0032218
1684.32	0.4565	0.4535	0.0029086
1687.8	0.459	0.4534	0.0056522
1691.28	0.459	0.4532	0.0058466
1694.76	0.4635	0.453	0.0105
1698.24	0.4645	0.4528	0.0117
1701.72	0.4557	0.4526	0.0030812
1705.2	0.4571	0.4525	0.0046623
1708.68	0.4597	0.4523	0.0074378
1712.16	0.4622	0.4521	0.0101
1715.64	0.4617	0.4519	0.009826
1719.12	0.4624	0.4517	0.0107
1722.6	0.4598	0.4516	0.0081959
1726.08	0.4571	0.4514	0.0057016
1729.56	0.4533	0.4512	0.0020423
1733.04	0.4604	0.4511	0.0093071
1736.52	0.4592	0.4509	0.0082778
1740	0.46	0.4507	0.0093111
1743.48	0.463	0.4506	0.0125
1746.96	0.4582	0.4504	0.0078145
1750.44	0.4632	0.4502	0.0129
1753.92	0.4653	0.4501	0.0152
1757.4	0.4607	0.4499	0.0108
1760.88	0.4621	0.4497	0.0124
1764.36	0.4575	0.4496	0.0078998
1767.84	0.4496	0.4494	0.00020991
1771.32	0.4548	0.4492	0.0055557
1774.8	0.4559	0.4491	0.0068657
1778.28	0.4591	0.4489	0.0102
1781.76	0.453	0.4488	0.0042642
1785.24	0.4528	0.4486	0.0042009
1788.72	0.4557	0.4485	0.00722
1792.2	0.4597	0.4483	0.0114
1795.68	0.4536	0.4481	0.005422
1799.16	0.4524	0.448	0.0043741
1802.64	0.462	0.4478	0.0142
1806.12	0.4502	0.4477	0.0024901
1809.6	0.4572	0.4475	0.0096523
1813.08	0.4534	0.4474	0.0060451
1816.56	0.4575	0.4472	0.0102
1820.04	0.4529	0.4471	0.0058035
1823.52	0.4522	0.4469	0.0052546
1827	0.4488	0.4468	0.0019626
1830.48	0.4532	0.4467	0.0065178
1833.96	0.4483	0.4465	0.0018201
1837.44	0.4475	0.4464	0.0010955
1840.92	0.4522	0.4462	0.0059232
1844.4	0.4522	0.4461	0.0060638
1847.88	0.452	0.4459	0.0060235
1851.36	0.4461	0.4458	0.00030498
1854.84	0.4445	0.4457	-0.0011629
1858.32	0.4439	0.4455	-0.001614
1861.8	0.4445	0.4454	-0.00089301
1865.28	0.4477	0.4453	0.0024157
1868.76	0.4423	0.4451	-0.0027965
1872.24	0.4445	0.445	-0.00044937
1875.72	0.4473	0.4449	0.0023994
1879.2	0.4498	0.4447	0.0050963
1882.68	0.446	0.4446	0.001417
1886.16	0.4481	0.4445	0.003682
1889.64	0.4468	0.4443	0.0024656
1893.12	0.4537	0.4442	0.0095252
1896.6	0.4567	0.4441	0.0126
1900.08	0.4482	0.4439	0.0042942
1903.56	0.4483	0.4438	0.004457
1907.04	0.4513	0.4437	0.0075916
1910.52	0.4511	0.4436	0.0075154
1914	0.4476	0.4434	0.0042117
1917.48	0.4517	0.4433	0.0084046
1920.96	0.4443	0.4432	0.0011176
1924.44	0.449	0.4431	0.0059144
1927.92	0.4543	0.4429	0.0114
1931.4	0.4511	0.4428	0.0082816
1934.88	0.4505	0.4427	0.0078216
1938.36	0.4449	0.4426	0.0023554
1941.84	0.4411	0.4425	-0.0013402
1945.32	0.4459	0.4423	0.0035506
1948.8	0.4489	0.4422	0.0066866
1952.28	0.447	0.4421	0.0049282
1955.76	0.4455	0.442	0.0034878
1959.24	0.4466	0.4419	0.0047368
1962.72	0.4423	0.4418	0.00051578
1966.2	0.4444	0.4416	0.0027996
1969.68	0.4479	0.4415	0.0063517
1973.16	0.4443	0.4414	0.0028647
1976.64	0.4455	0.4413	0.0042131
1980.12	0.4482	0.4412	0.0070423
1983.6	0.4404	0.4411	-0.00067741
1987.08	0.4418	0.441	0.00087937
1990.56	0.4478	0.4409	0.0069152
1994.04	0.4481	0.4407	0.0073997
1997.52	0.445	0.4406	0.0044015
2001	0.4433	0.4405	0.0027689
2004.48	0.4512	0.4404	0.0108
2007.96	0.4404	0.4403	4.4394e-05
2011.44	0.4437	0.4402	0.0034837
2014.92	0.4486	0.4401	0.0084861
2018.4	0.4422	0.44	0.0022239
2021.88	0.4435	0.4399	0.0035922
2025.36	0.4451	0.4398	0.0052785
2028.84	0.4452	0.4397	0.0054727
2032.32	0.4444	0.4396	0.004816
2035.8	0.4444	0.4395	0.0048937
2039.28	0.442	0.4394	0.0026352
2042.76	0.4428	0.4393	0.0034998
2046.24	0.4411	0.4392	0.0019311
2049.72	0.4438	0.4391	0.004711
2053.2	0.4479	0.439	0.0088877
2056.68	0.4444	0.4389	0.0055306
2060.16	0.4426	0.4388	0.0037988
2063.64	0.4418	0.4387	0.0031576
2067.12	0.4399	0.4386	0.0013016
2070.6	0.438	0.4385	-0.00047374
2074.08	0.4431	0.4384	0.0047192
2077.56	0.436	0.4383	-0.0022753
2081.04	0.4426	0.4382	0.0043849
2084.52	0.4356	0.4381	-0.0025395
2088	0.4379	0.438	-0.00010396
2091.48	0.4395	0.4379	0.0015454
2094.96	0.4479	0.4378	0.01
2098.44	0.4389	0.4377	0.0011847
2101.92	0.441	0.4377	0.0033542
2105.4	0.4375	0.4376	-5.5252e-05
2108.88	0.4369	0.4375	-0.00061145
2112.36	0.4353	0.4374	-0.002078
2115.84	0.4381	0.4373	0.00080968
2119.32	0.4429	0.4372	0.0056919
2122.8	0.4395	0.4371	0.0023739
2126.28	0.4419	0.437	0.0048768
2129.76	0.4412	0.4369	0.0042787
2133.24	0.4421	0.4369	0.005219
2136.72	0.4395	0.4368	0.0027406
2140.2	0.4379	0.4367	0.001187
2143.68	0.4383	0.4366	0.0017213
2147.16	0.4428	0.4365	0.0063019
2150.64	0.438	0.4364	0.0015234
2154.12	0.4361	0.4364	-0.00026456
2157.6	0.4397	0.4363	0.0034689
2161.08	0.4395	0.4362	0.003274
2164.56	0.4389	0.4361	0.0027767
2168.04	0.4432	0.436	0.0071557
2171.52	0.4383	0.4359	0.0024027
2175	0.4451	0.4359	0.0092361
2178.48	0.4366	0.4358	0.00082823
2181.96	0.4376	0.4357	0.0018852
2185.44	0.4402	0.4356	0.0045255
2188.92	0.4362	0.4355	0.00062702
2192.4	0.4406	0.4355	0.0051394
2195.88	0.4389	0.4354	0.0035292
2199.36	0.4435	0.4353	0.0081377
2202.84	0.4353	0.4352	7.2356e-05
2206.32	0.4377	0.4352	0.0024908
2209.8	0.4415	0.4351	0.0064319
2213.28	0.4417	0.435	0.0066731
2216.76	0.435	0.4349	5.0189e-05
2220.24	0.4417	0.4349	0.0068583
2223.72	0.4344	0.4348	-0.00042967
2227.2	0.4319	0.4347	-0.0027794
2230.68	0.4345	0.4346	-0.00011259
2234.16	0.4343	0.4346	-0.00031548
2237.64	0.4382	0.4345	0.0036877
2241.12	0.439	0.4344	0.0046103
2244.6	0.4366	0.4344	0.0022666
2248.08	0.4357	0.4343	0.0013802
2251.56	0.4398	0.4342	0.0055707
2255.04	0.4325	0.4341	-0.0016214
2258.52	0.4314	0.4341	-0.0026523
2262	0.4322	0.434	-0.0018348
2265.48	0.4313	0.4339	-0.0026833
2268.96	0.4292	0.4339	-0.0046433
2272.44	0.43	0.4338	-0.0038059
2275.92	0.4266	0.4337	-0.0071097
2279.4	0.4403	0.4337	0.0065855
2282.88	0.4372	0.4336	0.0036488
2286.36	0.432	0.4335	-0.0015524
2289.84	0.4311	0.4335	-0.0023183
2293.32	0.4331	0.4334	-0.00027697
2296.8	0.4314	0.4333	-0.0019812
2300.28	0.431	0.4333	-0.0022419
2303.76	0.4338	0.4332	0.00055353
2307.24	0.429	0.4331	-0.0041084
2310.72	0.4348	0.4331	0.0016917
2314.2	0.4279	0.433	-0.0051116
2317.68	0.4381	0.433	0.0050981
2321.16	0.4299	0.4329	-0.0030088
2324.64	0.4287	0.4328	-0.0041601
2328.12	0.4326	0.4328	-0.00017226
2331.6	0.4252	0.4327	-0.0075354
2335.08	0.4325	0.4326	-0.00017973
2338.56	0.4296	0.4326	-0.0029445
2342.04	0.4265	0.4325	-0.0060057
2345.52	0.4304	0.4325	-0.0021033
2349	0.426	0.4324	-0.0063967
2352.48	0.4261	0.4323	-0.0062286
2355.96	0.4314	0.4323	-0.00085101
2359.44	0.4259	0.4322	-0.0062954
2362.92	0.4262	0.4322	-0.0059282
2366.4	0.4259	0.4321	-0.0062165
2369.88	0.4275	0.4321	-0.0045546
2373.36	0.424	0.432	-0.0079565
2376.84	0.4305	0.4319	-0.0014665
2380.32	0.4264	0.4319	-0.0055125
2383.8	0.4286	0.4318	-0.0032354
2387.28	0.4273	0.4318	-0.0044994
2390.76	0.4324	0.4317	0.00070793
2394.24	0.4344	0.4317	0.0027801
2397.72	0.4267	0.4316	-0.0048723
2401.2	0.4219	0.4316	-0.0096394
2404.68	0.419	0.4315	-0.0125
2408.16	0.4303	0.4314	-0.0011889
2411.64	0.4301	0.4314	-0.0012576
2415.12	0.4293	0.4313	-0.0020398
2418.6	0.4232	0.4313	-0.0080766
2422.08	0.438	0.4312	0.0067294
2425.56	0.4277	0.4312	-0.0034956
2429.04	0.4284	0.4311	-0.0027558
2432.52	0.4296	0.4311	-0.0015138
2436	0.4231	0.431	-0.0079333
2439.48	0.4337	0.431	0.0027146
2442.96	0.4308	0.4309	-0.00016778
2446.44	0.4368	0.4309	0.0059502
2449.92	0.4283	0.4308	-0.0025476
2453.4	0.4276	0.4308	-0.0031253
2456.88	0.4248	0.4307	-0.0059535
2460.36	0.4278	0.4307	-0.0028829
2463.84	0.4234	0.4306	-0.0072002
2467.32	0.4238	0.4306	-0.0067939
2470.8	0.424	0.4305	-0.0064795
2474.28	0.4325	0.4305	0.0020248
2477.76	0.4301	0.4304	-0.00032728
2481.24	0.4233	0.4304	-0.0070482
2484.72	0.4238	0.4303	-0.0065342
2488.2	0.4247	0.4303	-0.0055763
2491.68	0.433	0.4302	0.0028033
2495.16	0.4294	0.4302	-0.00078595
2498.64	0.4348	0.4302	0.0046965
2502.12	0.4317	0.4301	0.0015703
2505.6	0.4215	0.4301	-0.008532
2509.08	0.4285	0.43	-0.0014911
2512.56	0.4257	0.43	-0.0042715
2516.04	0.4324	0.4299	0.0024473
2519.52	0.4335	0.4299	0.003622
2523	0.4267	0.4298	-0.0031793
2526.48	0.4273	0.4298	-0.0024448
2529.96	0.4291	0.4297	-0.00067124
2533.44	0.4267	0.4297	-0.003051
2536.92	0.4316	0.4297	0.0019189
2540.4	0.4297	0.4296	0.00012808
2543.88	0.4273	0.4296	-0.0022811
2547.36	0.4225	0.4295	-0.0070511
2550.84	0.4214	0.4295	-0.008049
2554.32	0.4296	0.4295	0.00014733
2557.8	0.4275	0.4294	-0.0018609
2561.28	0.4268	0.4294	-0.0025341
2564.76	0.4189	0.4293	-0.0104
2568.24	0.4312	0.4293	0.0019632
2571.72	0.4248	0.4292	-0.0044323
2575.2	0.4282	0.4292	-0.0010263
2578.68	0.4277	0.4292	-0.0014833
2582.16	0.4277	0.4291	-0.0013827
2585.64	0.4206	0.4291	-0.0084861
2589.12	0.422	0.429	-0.007031
2592.6	0.4281	0.429	-0.00089886
2596.08	0.4224	0.429	-0.0065716
2599.56	0.422	0.4289	-0.0069692
2603.04	0.4208	0.4289	-0.0080424
2606.52	0.4211	0.4289	-0.0077492
2610	0.4228	0.4288	-0.0060404
2613.48	0.434	0.4288	0.0052065
2616.96	0.428	0.4287	-0.00073557
2620.44	0.4234	0.4287	-0.0052719
2623.92	0.428	0.4287	-0.00069959
2627.4	0.4322	0.4286	0.0035578
2630.88	0.4206	0.4286	-0.0080095
2634.36	0.4212	0.4286	-0.0073884
2637.84	0.4294	0.4285	0.00090875
2641.32	0.4239	0.4285	-0.0045784
2644.8	0.4236	0.4284	-0.0048054
2648.28	0.4323	0.4284	0.0038954
2651.76	0.4217	0.4284	-0.0066561
2655.24	0.4231	0.4283	-0.0052352
2658.72	0.4142	0.4283	-0.0141
2662.2	0.4286	0.4283	0.00034559
2665.68	0.4207	0.4282	-0.0075804
2669.16	0.421	0.4282	-0.0072208
2672.64	0.4275	0.4282	-0.00066446
2676.12	0.4194	0.4281	-0.0087248
2679.6	0.4216	0.4281	-0.0065247
2683.08	0.4282	0.4281	0.00013861
2686.56	0.4216	0.428	-0.0064527
2690.04	0.4251	0.428	-0.0028786
2693.52	0.4306	0.428	0.0026405
2697	0.4225	0.4279	-0.0054602
2700.48	0.4265	0.4279	-0.0013811
2703.96	0.424	0.4279	-0.0038265
2707.44	0.4278	0.4278	-5.1585e-06
2710.92	0.4299	0.4278	0.0021406
2714.4	0.4235	0.4278	-0.004257
2717.88	0.4221	0.4277	-0.0056628
2721.36	0.4225	0.4277	-0.0051663
2724.84	0.4252	0.4277	-0.0024436
2728.32	0.4147	0.4276	-0.0129
2731.8	0.4254	0.4276	-0.0022251
2735.28	0.4192	0.4276	-0.0083384
2738.76	0.4181	0.4276	-0.0094539
2742.24	0.4156	0.4275	-0.0119
2745.72	0.425	0.4275	-0.0025291
2749.2	0.4145	0.4275	-0.013
2752.68	0.4192	0.4274	-0.0082318
2756.16	0.4216	0.4274	-0.0058241
2759.64	0.4168	0.4274	-0.0106
2763.12	0.4208	0.4273	-0.0065037
2766.6	0.4188	0.4273	-0.0084676
2770.08	0.4254	0.4273	-0.0019155
2773.56	0.4226	0.4273	-0.0046226
2777.04	0.4276	0.4272	0.00040701
2780.52	0.4221	0.4272	-0.005086
2784	0.4252	0.4272	-0.0019969
2787.48	0.4145	0.4271	-0.0126
2790.96	0.4184	0.4271	-0.0087559
2794.44	0.4159	0.4271	-0.0112
2797.92	0.4215	0.4271	-0.0055928
2801.4	0.4239	0.427	-0.0031717
2804.88	0.4195	0.427	-0.0074665
2808.36	0.4119	0.427	-0.0151
2811.84	0.4188	0.4269	-0.0081646
2815.32	0.4152	0.4269	-0.0117
2818.8	0.4213	0.4269	-0.0056248
2822.28	0.4121	0.4269	-0.0147
2825.76	0.4102	0.4268	-0.0167
2829.24	0.4297	0.4268	0.002911
2832.72	0.4215	0.4268	-0.0053191
2836.2	0.416	0.4268	-0.0108
2839.68	0.4188	0.4267	-0.0079053
2843.16	0.4147	0.4267	-0.012
2846.64	0.4195	0.4267	-0.0072334
2850.12	0.4113	0.4267	-0.0154
2853.6	0.4169	0.4266	-0.0096984
2857.08	0.423	0.4266	-0.0036483
2860.56	0.4187	0.4266	-0.0078788
2864.04	0.4063	0.4266	-0.0203
2867.52	0.4161	0.4265	-0.0104
2871	0.4251	0.4265	-0.0014371
2874.48	0.4141	0.4265	-0.0123
2877.96	0.4139	0.4265	-0.0125
2881.44	0.4055	0.4264	-0.0209
2884.92	0.409	0.4264	-0.0175
2888.4	0.4145	0.4264	-0.0119
2891.88	0.415	0.4264	-0.0114
2895.36	0.4118	0.4263	-0.0146
2898.84	0.4022	0.4263	-0.0242
2902.32	0.4058	0.4263	-0.0205
2905.8	0.4108	0.4263	-0.0155
2909.28	0.4169	0.4263	-0.0093258
2912.76	0.4148	0.4262	-0.0115
2916.24	0.3998	0.4262	-0.0264
2919.72	0.4159	0.4262	-0.0103
2923.2	0.4034	0.4262	-0.0228
2926.68	0.4129	0.4261	-0.0133
2930.16	0.4184	0.4261	-0.0077091
2933.64	0.423	0.4261	-0.0030909
2937.12	0.4082	0.4261	-0.0179
2940.6	0.423	0.4261	-0.0030579
2944.08	0.4227	0.426	-0.003364
2947.56	0.4056	0.426	-0.0205
2951.04	0.4007	0.426	-0.0253
2954.52	0.4105	0.426	-0.0155
2958	0.4088	0.426	-0.0172
2961.48	0.4085	0.4259	-0.0174
2964.96	0.4065	0.4259	-0.0194
2968.44	0.4062	0.4259	-0.0197
2971.92	0.3953	0.4259	-0.0306

## Sheet: Panel b
Time in microseconds	Red curve	Fit to red curve (Black line)	Blue curve (Residuals)
-588.12	--	2.5623	--
-584.64	--	2.5453	--
-581.16	--	2.5284	--
-577.68	--	2.5116	--
-574.2	--	2.495	--
-570.72	--	2.4785	--
-567.24	--	2.4621	--
-563.76	--	2.4459	--
-560.28	--	2.4298	--
-556.8	--	2.4139	--
-553.32	--	2.3981	--
-549.84	--	2.3824	--
-546.36	--	2.3669	--
-542.88	--	2.3515	--
-539.4	--	2.3362	--
-535.92	--	2.321	--
-532.44	--	2.306	--
-528.96	--	2.2911	--
-525.48	--	2.2763	--
-522	--	2.2617	--
-518.52	--	2.2472	--
-515.04	--	2.2328	--
-511.56	--	2.2185	--
-508.08	--	2.2043	--
-504.6	--	2.1903	--
-501.12	--	2.1763	--
-497.64	--	2.1625	--
-494.16	--	2.1488	--
-490.68	--	2.1352	--
-487.2	--	2.1218	--
-483.72	--	2.1084	--
-480.24	--	2.0952	--
-476.76	--	2.082	--
-473.28	--	2.069	--
-469.8	--	2.0561	--
-466.32	--	2.0433	--
-462.84	--	2.0306	--
-459.36	--	2.018	--
-455.88	--	2.0055	--
-452.4	--	1.9931	--
-448.92	--	1.9808	--
-445.44	--	1.9687	--
-441.96	--	1.9566	--
-438.48	--	1.9446	--
-435	--	1.9327	--
-431.52	--	1.921	--
-428.04	--	1.9093	--
-424.56	--	1.8977	--
-421.08	--	1.8862	--
-417.6	--	1.8748	--
-414.12	--	1.8635	--
-410.64	--	1.8523	--
-407.16	--	1.8412	--
-403.68	--	1.8302	--
-400.2	--	1.8193	--
-396.72	--	1.8085	--
-393.24	--	1.7977	--
-389.76	--	1.7871	--
-386.28	--	1.7765	--
-382.8	--	1.766	--
-379.32	--	1.7556	--
-375.84	--	1.7453	--
-372.36	--	1.7351	--
-368.88	--	1.725	--
-365.4	--	1.715	--
-361.92	--	1.705	--
-358.44	--	1.6951	--
-354.96	--	1.6853	--
-351.48	--	1.6756	--
-348	--	1.666	--
-344.52	--	1.6564	--
-341.04	--	1.6469	--
-337.56	--	1.6375	--
-334.08	--	1.6282	--
-330.6	--	1.619	--
-327.12	--	1.6098	--
-323.64	--	1.6007	--
-320.16	--	1.5917	--
-316.68	--	1.5828	--
-313.2	--	1.5739	--
-309.72	--	1.5651	--
-306.24	--	1.5564	--
-302.76	--	1.5477	--
-299.28	--	1.5392	--
-295.8	--	1.5307	--
-292.32	--	1.5222	--
-288.84	--	1.5139	--
-285.36	--	1.5056	--
-281.88	--	1.4973	--
-278.4	--	1.4892	--
-274.92	--	1.4811	--
-271.44	--	1.4731	--
-267.96	--	1.4651	--
-264.48	--	1.4572	--
-261	--	1.4494	--
-257.52	--	1.4416	--
-254.04	--	1.4339	--
-250.56	--	1.4263	--
-247.08	--	1.4187	--
-243.6	--	1.4112	--
-240.12	--	1.4038	--
-236.64	--	1.3964	--
-233.16	--	1.3891	--
-229.68	--	1.3818	--
-226.2	--	1.3746	--
-222.72	--	1.3674	--
-219.24	--	1.3603	--
-215.76	--	1.3533	--
-212.28	--	1.3463	--
-208.8	--	1.3394	--
-205.32	--	1.3326	--
-201.84	--	1.3258	--
-198.36	--	1.319	--
-194.88	--	1.3123	--
-191.4	--	1.3057	--
-187.92	--	1.2991	--
-184.44	--	1.2926	--
-180.96	--	1.2861	--
-177.48	--	1.2797	--
-174	--	1.2733	--
-170.52	--	1.267	--
-167.04	--	1.2608	--
-163.56	--	1.2546	--
-160.08	--	1.2484	--
-156.6	--	1.2423	--
-153.12	--	1.2362	--
-149.64	--	1.2302	--
-146.16	--	1.2243	--
-142.68	--	1.2183	--
-139.2	--	1.2125	--
-135.72	--	1.2067	--
-132.24	--	1.2009	--
-128.76	--	1.1952	--
-125.28	--	1.1895	--
-121.8	--	1.1839	--
-118.32	--	1.1783	--
-114.84	--	1.1727	--
-111.36	--	1.1672	--
-107.88	--	1.1618	--
-104.4	--	1.1564	--
-100.92	--	1.151	--
-97.44	--	1.1457	--
-93.96	--	1.1404	--
-90.48	--	1.1352	--
-87	--	1.13	--
-83.52	--	1.1249	--
-80.04	--	1.1198	--
-76.56	--	1.1147	--
-73.08	--	1.1097	--
-69.6	--	1.1047	--
-66.12	--	1.0998	--
-62.64	--	1.0949	--
-59.16	--	1.09	--
-55.68	--	1.0852	--
-52.2	--	1.0804	--
-48.72	--	1.0757	--
-45.24	--	1.071	--
-41.76	--	1.0663	--
-38.28	--	1.0617	--
-34.8	--	1.0571	--
-31.32	--	1.0525	--
-27.84	--	1.048	--
-24.36	--	1.0435	--
-20.88	--	1.0391	--
-17.4	--	1.0347	--
-13.92	--	1.0303	--
-10.44	--	1.026	--
-6.96	--	1.0217	--
-3.48	--	1.0174	--
0	--	1.0132	--
3.48	--	1.009	--
6.96	--	1.0048	--
10.44	--	1.0007	--
13.92	--	0.9966	--
17.4	--	0.9925	--
20.88	--	0.9885	--
24.36	--	0.9845	--
27.84	--	0.9805	--
31.32	--	0.9765	--
34.8	--	0.9726	--
38.28	--	0.9688	--
41.76	--	0.9649	--
45.24	--	0.9611	--
48.72	--	0.9573	--
52.2	--	0.9536	--
55.68	--	0.9499	--
59.16	--	0.9462	--
62.64	--	0.9425	--
66.12	0.9292	0.9389	0.009617
69.6	0.9326	0.9353	0.0026472
73.08	0.9354	0.9317	-0.0036959
76.56	0.9473	0.9281	-0.0192
80.04	0.9634	0.9246	-0.0388
83.52	0.9299	0.9211	-0.008733
87	0.9085	0.9177	0.0092026
90.48	0.9051	0.9142	0.009117
93.96	0.9396	0.9108	-0.0288
97.44	0.9127	0.9074	-0.0052266
100.92	0.8969	0.9041	0.0071276
104.4	0.9278	0.9007	-0.0271
107.88	0.8948	0.8974	0.0026807
111.36	0.8808	0.8942	0.0134
114.84	0.9028	0.8909	-0.0118
118.32	0.8839	0.8877	0.0038021
121.8	0.8968	0.8845	-0.0123
125.28	0.8649	0.8813	0.0164
128.76	0.8574	0.8782	0.0208
132.24	0.8677	0.8751	0.0073587
135.72	0.8643	0.872	0.0076314
139.2	0.8726	0.8689	-0.0037102
142.68	0.8875	0.8658	-0.0217
146.16	0.8444	0.8628	0.0184
149.64	0.8576	0.8598	0.0022301
153.12	0.8652	0.8568	-0.0084033
156.6	0.8437	0.8539	0.0101
160.08	0.8455	0.8509	0.0054821
163.56	0.8349	0.848	0.0131
167.04	0.8566	0.8451	-0.0115
170.52	0.8253	0.8423	0.017
174	0.8308	0.8394	0.0086472
177.48	0.8161	0.8366	0.0206
180.96	0.8283	0.8338	0.0055257
184.44	0.8328	0.8311	-0.0017594
187.92	0.8151	0.8283	0.0132
191.4	0.8135	0.8256	0.0121
194.88	0.8239	0.8229	-0.0010883
198.36	0.805	0.8202	0.0151
201.84	0.8409	0.8175	-0.0234
205.32	0.8378	0.8149	-0.0229
208.8	0.8062	0.8122	0.0060657
212.28	0.7983	0.8096	0.0114
215.76	0.7833	0.807	0.0237
219.24	0.7895	0.8045	0.015
222.72	0.8012	0.8019	0.000701
226.2	0.7928	0.7994	0.0065789
229.68	0.8136	0.7969	-0.0167
233.16	0.7852	0.7944	0.0092324
236.64	0.7957	0.7919	-0.0037179
240.12	0.8114	0.7895	-0.0219
243.6	0.7902	0.7871	-0.0031645
247.08	0.7908	0.7847	-0.006134
250.56	0.7797	0.7823	0.0025448
254.04	0.7776	0.7799	0.0023237
257.52	0.782	0.7775	-0.0044142
261	0.7529	0.7752	0.0223
264.48	0.7689	0.7729	0.0040053
267.96	0.7614	0.7706	0.0091481
271.44	0.7616	0.7683	0.0067239
274.92	0.7694	0.766	-0.0033503
278.4	0.7699	0.7638	-0.0061028
281.88	0.7738	0.7616	-0.0122
285.36	0.7619	0.7593	-0.0025751
288.84	0.7707	0.7572	-0.0135
292.32	0.7493	0.755	0.0056981
295.8	0.7722	0.7528	-0.0194
299.28	0.7524	0.7507	-0.0017467
302.76	0.7638	0.7485	-0.0153
306.24	0.725	0.7464	0.0214
309.72	0.7491	0.7443	-0.0047529
313.2	0.7569	0.7422	-0.0146
316.68	0.753	0.7402	-0.0129
320.16	0.7261	0.7381	0.012
323.64	0.7184	0.7361	0.0177
327.12	0.7504	0.7341	-0.0163
330.6	0.741	0.7321	-0.0089326
334.08	0.7177	0.7301	0.0124
337.56	0.7333	0.7281	-0.0052218
341.04	0.7348	0.7262	-0.0086751
344.52	0.7365	0.7242	-0.0123
348	0.7369	0.7223	-0.0147
351.48	0.7273	0.7204	-0.0068791
354.96	0.7204	0.7185	-0.0018881
358.44	0.7222	0.7166	-0.0055904
361.92	0.6944	0.7147	0.0203
365.4	0.6962	0.7129	0.0167
368.88	0.7087	0.711	0.0023465
372.36	0.7174	0.7092	-0.0081908
375.84	0.7026	0.7074	0.0047547
379.32	0.6957	0.7056	0.0098395
382.8	0.7048	0.7038	-0.0010497
386.28	0.6962	0.702	0.0058462
389.76	0.6872	0.7003	0.0131
393.24	0.6754	0.6985	0.0231
396.72	0.6874	0.6968	0.0094109
400.2	0.679	0.6951	0.0161
403.68	0.6982	0.6934	-0.004863
407.16	0.6961	0.6917	-0.0044398
410.64	0.6952	0.69	-0.0052253
414.12	0.6711	0.6883	0.0172
417.6	0.6679	0.6866	0.0188
421.08	0.6788	0.685	0.0062105
424.56	0.6838	0.6834	-0.00045829
428.04	0.6661	0.6818	0.0157
431.52	0.6699	0.6801	0.0102
435	0.6794	0.6785	-0.00087322
438.48	0.6617	0.677	0.0152
441.96	0.6664	0.6754	0.0089848
445.44	0.6871	0.6738	-0.0133
448.92	0.6639	0.6723	0.0083329
452.4	0.6595	0.6707	0.0113
455.88	0.6739	0.6692	-0.0046915
459.36	0.6867	0.6677	-0.019
462.84	0.6735	0.6662	-0.0072978
466.32	0.6745	0.6647	-0.0098125
469.8	0.6618	0.6632	0.0014479
473.28	0.6711	0.6617	-0.0093419
476.76	0.6625	0.6603	-0.002244
480.24	0.6587	0.6588	0.00018703
483.72	0.6515	0.6574	0.0058753
487.2	0.6498	0.656	0.0061731
490.68	0.6496	0.6546	0.0049184
494.16	0.6501	0.6531	0.0030383
497.64	0.6252	0.6517	0.0265
501.12	0.6623	0.6504	-0.012
504.6	0.6551	0.649	-0.0060796
508.08	0.6513	0.6476	-0.0037288
511.56	0.6479	0.6463	-0.0016775
515.04	0.6349	0.6449	0.01
518.52	0.6405	0.6436	0.0030979
522	0.6323	0.6422	0.01
525.48	0.6382	0.6409	0.0027527
528.96	0.6443	0.6396	-0.0047258
532.44	0.6418	0.6383	-0.0034896
535.92	0.648	0.637	-0.0109
539.4	0.6396	0.6358	-0.0038333
542.88	0.6371	0.6345	-0.0026143
546.36	0.6543	0.6332	-0.0211
549.84	0.6488	0.632	-0.0169
553.32	0.6404	0.6307	-0.0097027
556.8	0.627	0.6295	0.0024985
560.28	0.6396	0.6283	-0.0114
563.76	0.632	0.627	-0.0049568
567.24	0.6367	0.6258	-0.0108
570.72	0.6412	0.6246	-0.0165
574.2	0.6286	0.6234	-0.0051727
577.68	0.6273	0.6223	-0.0049934
581.16	0.6226	0.6211	-0.0015591
584.64	0.6268	0.6199	-0.0068781
588.12	0.6211	0.6188	-0.0023533
591.6	0.6168	0.6176	0.00083642
595.08	0.6235	0.6165	-0.0070478
598.56	0.6164	0.6153	-0.0010637
602.04	0.6123	0.6142	0.0018949
605.52	0.6126	0.6131	0.00045534
609	0.6115	0.612	0.00044375
612.48	0.6034	0.6109	0.0074855
615.96	0.6127	0.6098	-0.0029196
619.44	0.6008	0.6087	0.0079152
622.92	0.6191	0.6076	-0.0115
626.4	0.6036	0.6066	0.0029891
629.88	0.6121	0.6055	-0.0065812
633.36	0.6146	0.6044	-0.0101
636.84	0.5969	0.6034	0.0064942
640.32	0.6058	0.6023	-0.0034528
643.8	0.6066	0.6013	-0.0053295
647.28	0.61	0.6003	-0.0097409
650.76	0.6041	0.5993	-0.0048542
654.24	0.6033	0.5983	-0.0049985
657.72	0.601	0.5973	-0.0037748
661.2	0.6015	0.5963	-0.0052082
664.68	0.6055	0.5953	-0.0103
668.16	0.5979	0.5943	-0.0036592
671.64	0.5935	0.5933	-0.00017766
675.12	0.5874	0.5923	0.0049702
678.6	0.5792	0.5914	0.0122
682.08	0.584	0.5904	0.0064006
685.56	0.5903	0.5895	-0.00085717
689.04	0.5892	0.5885	-0.00064031
692.52	0.5861	0.5876	0.0015173
696	0.5746	0.5866	0.012
699.48	0.588	0.5857	-0.0022808
702.96	0.579	0.5848	0.0058279
706.44	0.5853	0.5839	-0.0014556
709.92	0.5846	0.583	-0.0016244
713.4	0.5915	0.5821	-0.0094459
716.88	0.5761	0.5812	0.0050369
720.36	0.58	0.5803	0.00024945
723.84	0.588	0.5794	-0.0086095
727.32	0.5786	0.5785	-0.00010808
730.8	0.5793	0.5777	-0.001624
734.28	0.5785	0.5768	-0.0017442
737.76	0.5781	0.5759	-0.0021343
741.24	0.5719	0.5751	0.0032151
744.72	0.5605	0.5742	0.0137
748.2	0.5741	0.5734	-0.00070889
751.68	0.568	0.5726	0.0045804
755.16	0.5692	0.5717	0.0025832
758.64	0.5786	0.5709	-0.0077149
762.12	0.5748	0.5701	-0.0046753
765.6	0.5678	0.5693	0.0014378
769.08	0.5662	0.5685	0.0022775
772.56	0.5623	0.5677	0.0053597
776.04	0.5706	0.5669	-0.0037322
779.52	0.5669	0.5661	-0.00080038
783	0.5791	0.5653	-0.0138
786.48	0.5705	0.5645	-0.0060338
789.96	0.5748	0.5637	-0.0111
793.44	0.5757	0.563	-0.0128
796.92	0.5651	0.5622	-0.0029472
800.4	0.5548	0.5614	0.0066712
803.88	0.5562	0.5607	0.0045207
807.36	0.5607	0.5599	-0.00078634
810.84	0.5507	0.5592	0.0084458
814.32	0.5546	0.5584	0.0038334
817.8	0.5587	0.5577	-0.00097456
821.28	0.5531	0.557	0.0039121
824.76	0.5536	0.5562	0.0025961
828.24	0.5506	0.5555	0.0049504
831.72	0.5546	0.5548	0.00018219
835.2	0.5593	0.5541	-0.0052292
838.68	0.5492	0.5534	0.0041821
842.16	0.5571	0.5527	-0.0043762
845.64	0.5561	0.552	-0.004165
849.12	0.5458	0.5513	0.0055267
852.6	0.5541	0.5506	-0.003554
856.08	0.5548	0.5499	-0.0049156
859.56	0.5519	0.5492	-0.0026504
863.04	0.5502	0.5486	-0.0016849
866.52	0.5434	0.5479	0.0044407
870	0.5441	0.5472	0.0031583
873.48	0.5454	0.5465	0.0011477
876.96	0.5468	0.5459	-0.00092467
880.44	0.5432	0.5452	0.0019805
883.92	0.5398	0.5446	0.0048047
887.4	0.5373	0.5439	0.0066414
890.88	0.5516	0.5433	-0.0083032
894.36	0.5453	0.5426	-0.0026234
897.84	0.5542	0.542	-0.0122
901.32	0.5456	0.5414	-0.0042547
904.8	0.545	0.5408	-0.0042296
908.28	0.5496	0.5401	-0.0095175
911.76	0.5418	0.5395	-0.0022765
915.24	0.5422	0.5389	-0.0032675
918.72	0.5373	0.5383	0.001023
922.2	0.5404	0.5377	-0.0027609
925.68	0.5403	0.5371	-0.0032065
929.16	0.5375	0.5365	-0.0010104
932.64	0.5383	0.5359	-0.0023917
936.12	0.5457	0.5353	-0.0104
939.6	0.5332	0.5347	0.0014417
943.08	0.5299	0.5341	0.0041993
946.56	0.5274	0.5335	0.0061493
950.04	0.5296	0.5329	0.0032918
953.52	0.5359	0.5324	-0.0035205
957	0.5291	0.5318	0.0026579
960.48	0.5302	0.5312	0.0010106
963.96	0.5301	0.5307	0.00054084
967.44	0.5268	0.5301	0.0033077
970.92	0.5335	0.5295	-0.0039858
974.4	0.5325	0.529	-0.0034912
977.88	0.5313	0.5284	-0.0028818
981.36	0.5307	0.5279	-0.0028455
984.84	0.5153	0.5273	0.0121
988.32	0.5211	0.5268	0.0057385
991.8	0.53	0.5263	-0.0037437
995.28	0.519	0.5257	0.0066824
998.76	0.5279	0.5252	-0.0027095
1002.24	0.5223	0.5247	0.0024135
1005.72	0.5264	0.5241	-0.0022451
1009.2	0.5258	0.5236	-0.0021841
1012.68	0.5248	0.5231	-0.0016944
1016.16	0.52	0.5226	0.0025424
1019.64	0.5201	0.5221	0.0019675
1023.12	0.5213	0.5216	0.00022558
1026.6	0.5264	0.5211	-0.0053575
1030.08	0.527	0.5205	-0.0064769
1033.56	0.5205	0.52	-0.0004737
1037.04	0.5234	0.5195	-0.0038348
1040.52	0.5181	0.5191	0.00098608
1044	0.5224	0.5186	-0.0038084
1047.48	0.5179	0.5181	0.00022021
1050.96	0.5164	0.5176	0.0011846
1054.44	0.5183	0.5171	-0.0012466
1057.92	0.5123	0.5166	0.0043257
1061.4	0.5218	0.5161	-0.0056145
1064.88	0.5142	0.5157	0.001478
1068.36	0.5173	0.5152	-0.0021426
1071.84	0.51	0.5147	0.0047663
1075.32	0.5197	0.5143	-0.0054379
1078.8	0.5127	0.5138	0.001053
1082.28	0.5117	0.5133	0.0016018
1085.76	0.5103	0.5129	0.0025298
1089.24	0.5138	0.5124	-0.0013456
1092.72	0.5156	0.512	-0.0036887
1096.2	0.5116	0.5115	-0.00011237
1099.68	0.5112	0.5111	-0.00016311
1103.16	0.5157	0.5106	-0.0050518
1106.64	0.5115	0.5102	-0.0013088
1110.12	0.5114	0.5097	-0.0016609
1113.6	0.5106	0.5093	-0.0013272
1117.08	0.5092	0.5088	-0.00038994
1120.56	0.5043	0.5084	0.0041459
1124.04	0.5046	0.508	0.0033336
1127.52	0.5056	0.5076	0.0019539
1131	0.5126	0.5071	-0.0054344
1134.48	0.5038	0.5067	0.0029268
1137.96	0.5097	0.5063	-0.0034334
1141.44	0.5035	0.5059	0.002408
1144.92	0.5062	0.5054	-0.00071916
1148.4	0.5032	0.505	0.0017824
1151.88	0.5065	0.5046	-0.0019071
1155.36	0.5047	0.5042	-0.00050511
1158.84	0.5029	0.5038	0.00091727
1162.32	0.4977	0.5034	0.0056796
1165.8	0.4972	0.503	0.0058242
1169.28	0.5075	0.5026	-0.0048984
1172.76	0.4999	0.5022	0.0022628
1176.24	0.4958	0.5018	0.0059738
1179.72	0.4941	0.5014	0.0072565
1183.2	0.5026	0.501	-0.0016323
1186.68	0.4974	0.5006	0.0031896
1190.16	0.507	0.5002	-0.0068185
1193.64	0.4994	0.4998	0.00037678
1197.12	0.5023	0.4994	-0.0028207
1200.6	0.4982	0.4991	0.0008356
1204.08	0.493	0.4987	0.0056329
1207.56	0.4961	0.4983	0.0022426
1211.04	0.5024	0.4979	-0.0044639
1214.52	0.4843	0.4975	0.0132
1218	0.4951	0.4972	0.002056
1221.48	0.4914	0.4968	0.0053616
1224.96	0.4958	0.4964	0.00062122
1228.44	0.498	0.4961	-0.0019365
1231.92	0.4943	0.4957	0.0013655
1235.4	0.494	0.4953	0.0013208
1238.88	0.4929	0.495	0.0020992
1242.36	0.492	0.4946	0.0026599
1245.84	0.4894	0.4943	0.0049021
1249.32	0.4896	0.4939	0.0042535
1252.8	0.4926	0.4935	0.00095859
1256.28	0.4932	0.4932	-6.2768e-06
1259.76	0.4916	0.4928	0.0012104
1263.24	0.4924	0.4925	8.1105e-05
1266.72	0.4934	0.4921	-0.0012269
1270.2	0.492	0.4918	-0.00020039
1273.68	0.4884	0.4915	0.0030235
1277.16	0.484	0.4911	0.0070848
1280.64	0.4883	0.4908	0.0024812
1284.12	0.4908	0.4904	-0.00032187
1287.6	0.4825	0.4901	0.0076005
1291.08	0.4898	0.4898	8.5253e-06
1294.56	0.4899	0.4894	-0.0004375
1298.04	0.4856	0.4891	0.0034718
1301.52	0.485	0.4888	0.0038105
1305	0.4858	0.4884	0.002597
1308.48	0.4794	0.4881	0.0086899
1311.96	0.4866	0.4878	0.001223
1315.44	0.4851	0.4875	0.0023827
1318.92	0.4865	0.4871	0.00065203
1322.4	0.4863	0.4868	0.00049628
1325.88	0.4897	0.4865	-0.0032054
1329.36	0.4799	0.4862	0.0062692
1332.84	0.4886	0.4859	-0.0026941
1336.32	0.4808	0.4856	0.0047352
1339.8	0.484	0.4852	0.0012848
1343.28	0.4786	0.4849	0.0062967
1346.76	0.488	0.4846	-0.0034209
1350.24	0.4882	0.4843	-0.0038467
1353.72	0.4839	0.484	0.00013835
1357.2	0.4814	0.4837	0.0023261
1360.68	0.4869	0.4834	-0.0035094
1364.16	0.4833	0.4831	-0.00021641
1367.64	0.477	0.4828	0.0058401
1371.12	0.4857	0.4825	-0.0032177
1374.6	0.4862	0.4822	-0.0039936
1378.08	0.482	0.4819	-8.6443e-05
1381.56	0.4756	0.4816	0.0060061
1385.04	0.4787	0.4813	0.0025858
1388.52	0.4767	0.481	0.0043181
1392	0.4797	0.4807	0.00097348
1395.48	0.4765	0.4804	0.0039068
1398.96	0.4851	0.4801	-0.0050056
1402.44	0.479	0.4799	0.0008359
1405.92	0.4798	0.4796	-0.00022127
1409.4	0.4777	0.4793	0.0015378
1412.88	0.4746	0.479	0.0043645
1416.36	0.4796	0.4787	-0.00087852
1419.84	0.475	0.4784	0.003438
1423.32	0.4778	0.4782	0.00040932
1426.8	0.4771	0.4779	0.00076443
1430.28	0.4753	0.4776	0.0023492
1433.76	0.4777	0.4773	-0.00038378
1437.24	0.4823	0.4771	-0.0052886
1440.72	0.4781	0.4768	-0.0013497
1444.2	0.4792	0.4765	-0.0027329
1447.68	0.4703	0.4762	0.0059461
1451.16	0.4751	0.476	0.00087583
1454.64	0.4776	0.4757	-0.0018992
1458.12	0.4799	0.4754	-0.0044972
1461.6	0.4742	0.4752	0.00091928
1465.08	0.4688	0.4749	0.0060622
1468.56	0.4719	0.4746	0.0027738
1472.04	0.4719	0.4744	0.0024409
1475.52	0.4726	0.4741	0.0014687
1479	0.4695	0.4739	0.0043226
1482.48	0.4696	0.4736	0.003978
1485.96	0.4656	0.4733	0.0077677
1489.44	0.4697	0.4731	0.0033587
1492.92	0.4685	0.4728	0.0043161
1496.4	0.4707	0.4726	0.0019004
1499.88	0.4701	0.4723	0.0022063
1503.36	0.4693	0.4721	0.0027626
1506.84	0.4687	0.4718	0.0031474
1510.32	0.47	0.4716	0.0015379
1513.8	0.4726	0.4713	-0.001326
1517.28	0.4689	0.4711	0.002199
1520.76	0.4637	0.4708	0.0071145
1524.24	0.472	0.4706	-0.0014501
1527.72	0.4696	0.4703	0.00074954
1531.2	0.4707	0.4701	-0.00060888
1534.68	0.4721	0.4698	-0.0022741
1538.16	0.4716	0.4696	-0.0020147
1541.64	0.4668	0.4694	0.00259
1545.12	0.4678	0.4691	0.0013486
1548.6	0.4677	0.4689	0.0011981
1552.08	0.4688	0.4686	-0.00018524
1555.56	0.471	0.4684	-0.0026406
1559.04	0.4675	0.4682	0.00069866
1562.52	0.4686	0.4679	-0.00071176
1566	0.4743	0.4677	-0.0066477
1569.48	0.4688	0.4675	-0.0013518
1572.96	0.4669	0.4672	0.0003017
1576.44	0.4656	0.467	0.0013735
1579.92	0.4673	0.4668	-0.00048613
1583.4	0.4675	0.4665	-0.00090801
1586.88	0.4662	0.4663	0.00014195
1590.36	0.4674	0.4661	-0.0013166
1593.84	0.4721	0.4659	-0.0062869
1597.32	0.4682	0.4656	-0.0025906
1600.8	0.4652	0.4654	0.0002537
1604.28	0.467	0.4652	-0.0017962
1607.76	0.467	0.465	-0.0020295
1611.24	0.4632	0.4647	0.0015808
1614.72	0.4694	0.4645	-0.0048731
1618.2	0.4675	0.4643	-0.0032114
1621.68	0.4589	0.4641	0.0052225
1625.16	0.4581	0.4639	0.0057327
1628.64	0.4609	0.4636	0.0027723
1632.12	0.4571	0.4634	0.0062891
1635.6	0.4596	0.4632	0.0035784
1639.08	0.4627	0.463	0.0003282
1642.56	0.457	0.4628	0.005782
1646.04	0.4606	0.4626	0.0019289
1649.52	0.4645	0.4624	-0.0021192
1653	0.4617	0.4621	0.00048371
1656.48	0.467	0.4619	-0.0050221
1659.96	0.4584	0.4617	0.0033466
1663.44	0.4567	0.4615	0.0048295
1666.92	0.4604	0.4613	0.00086662
1670.4	0.4622	0.4611	-0.0010696
1673.88	0.4591	0.4609	0.0018365
1677.36	0.4582	0.4607	0.0024525
1680.84	0.457	0.4605	0.0035196
1684.32	0.4565	0.4603	0.0038139
1687.8	0.459	0.4601	0.0010511
1691.28	0.459	0.4599	0.00083707
1694.76	0.4635	0.4597	-0.0038306
1698.24	0.4645	0.4595	-0.0050164
1701.72	0.4557	0.4593	0.0035417
1705.2	0.4571	0.4591	0.0019397
1708.68	0.4597	0.4589	-0.00085704
1712.16	0.4622	0.4587	-0.0035503
1715.64	0.4617	0.4585	-0.0032888
1719.12	0.4624	0.4583	-0.0041786
1722.6	0.4598	0.4581	-0.0017034
1726.08	0.4571	0.4579	0.00076803
1729.56	0.4533	0.4577	0.0044041
1733.04	0.4604	0.4575	-0.0028841
1736.52	0.4592	0.4573	-0.0018787
1740	0.46	0.4571	-0.0029361
1743.48	0.463	0.4569	-0.0061139
1746.96	0.4582	0.4567	-0.0014888
1750.44	0.4632	0.4565	-0.0066438
1753.92	0.4653	0.4563	-0.0089406
1757.4	0.4607	0.4561	-0.0045612
1760.88	0.4621	0.4559	-0.0061857
1764.36	0.4575	0.4558	-0.0017025
1767.84	0.4496	0.4556	0.0059609
1771.32	0.4548	0.4554	0.00058821
1774.8	0.4559	0.4552	-0.00074902
1778.28	0.4591	0.455	-0.0040838
1781.76	0.453	0.4548	0.0017973
1785.24	0.4528	0.4546	0.0018325
1788.72	0.4557	0.4545	-0.0012149
1792.2	0.4597	0.4543	-0.0054366
1795.68	0.4536	0.4541	0.00052544
1799.16	0.4524	0.4539	0.0015442
1802.64	0.462	0.4537	-0.0083085
1806.12	0.4502	0.4535	0.0033689
1809.6	0.4572	0.4534	-0.0038234
1813.08	0.4534	0.4532	-0.00024649
1816.56	0.4575	0.453	-0.0044468
1820.04	0.4529	0.4528	-6.6441e-05
1823.52	0.4522	0.4527	0.00045123
1827	0.4488	0.4525	0.0037119
1830.48	0.4532	0.4523	-0.00087507
1833.96	0.4483	0.4521	0.0037907
1837.44	0.4475	0.452	0.004483
1840.92	0.4522	0.4518	-0.00037721
1844.4	0.4522	0.4516	-0.00055057
1847.88	0.452	0.4514	-0.00054334
1851.36	0.4461	0.4513	0.0051419
1854.84	0.4445	0.4511	0.0065762
1858.32	0.4439	0.4509	0.0069935
1861.8	0.4445	0.4507	0.0062384
1865.28	0.4477	0.4506	0.0028954
1868.76	0.4423	0.4504	0.008073
1872.24	0.4445	0.4502	0.005691
1875.72	0.4473	0.4501	0.0028072
1879.2	0.4498	0.4499	7.4939e-05
1882.68	0.446	0.4497	0.0037186
1886.16	0.4481	0.4496	0.0014179
1889.64	0.4468	0.4494	0.0025982
1893.12	0.4537	0.4492	-0.0044977
1896.6	0.4567	0.4491	-0.0076177
1900.08	0.4482	0.4489	0.00065998
1903.56	0.4483	0.4487	0.00046009
1907.04	0.4513	0.4486	-0.0027117
1910.52	0.4511	0.4484	-0.002673
1914	0.4476	0.4482	0.00059299
1917.48	0.4517	0.4481	-0.0036379
1920.96	0.4443	0.4479	0.003611
1924.44	0.449	0.4477	-0.0012243
1927.92	0.4543	0.4476	-0.0066999
1931.4	0.4511	0.4474	-0.003669
1934.88	0.4505	0.4473	-0.003248
1938.36	0.4449	0.4471	0.0021788
1941.84	0.4411	0.4469	0.0058349
1945.32	0.4459	0.4468	0.00090437
1948.8	0.4489	0.4466	-0.0022717
1952.28	0.447	0.4465	-0.00055347
1955.76	0.4455	0.4463	0.00084656
1959.24	0.4466	0.4462	-0.00044306
1962.72	0.4423	0.446	0.0037372
1966.2	0.4444	0.4458	0.0014123
1969.68	0.4479	0.4457	-0.002181
1973.16	0.4443	0.4455	0.0012646
1976.64	0.4455	0.4454	-0.00012553
1980.12	0.4482	0.4452	-0.0029966
1983.6	0.4404	0.4451	0.0046811
1987.08	0.4418	0.4449	0.0030821
1990.56	0.4478	0.4448	-0.0029962
1994.04	0.4481	0.4446	-0.0035234
1997.52	0.445	0.4445	-0.00056804
2001	0.4433	0.4443	0.0010215
2004.48	0.4512	0.4442	-0.0070341
2007.96	0.4404	0.444	0.0036594
2011.44	0.4437	0.4439	0.00017647
2014.92	0.4486	0.4437	-0.0048697
2018.4	0.4422	0.4436	0.0013484
2021.88	0.4435	0.4434	-6.4028e-05
2025.36	0.4451	0.4433	-0.0017947
2028.84	0.4452	0.4431	-0.0020335
2032.32	0.4444	0.443	-0.0014215
2035.8	0.4444	0.4428	-0.0015442
2039.28	0.442	0.4427	0.0006693
2042.76	0.4428	0.4425	-0.00024058
2046.24	0.4411	0.4424	0.0012826
2049.72	0.4438	0.4422	-0.0015429
2053.2	0.4479	0.4421	-0.0057654
2056.68	0.4444	0.442	-0.0024543
2060.16	0.4426	0.4418	-0.00076863
2063.64	0.4418	0.4417	-0.0001737
2067.12	0.4399	0.4415	0.0016357
2070.6	0.438	0.4414	0.0033645
2074.08	0.4431	0.4412	-0.0018753
2077.56	0.436	0.4411	0.0050722
2081.04	0.4426	0.441	-0.0016352
2084.52	0.4356	0.4408	0.005242
2088	0.4379	0.4407	0.0027589
2091.48	0.4395	0.4405	0.001062
2094.96	0.4479	0.4404	-0.0074667
2098.44	0.4389	0.4403	0.001327
2101.92	0.441	0.4401	-0.00089066
2105.4	0.4375	0.44	0.0024705
2108.88	0.4369	0.4398	0.0029783
2112.36	0.4353	0.4397	0.0043963
2115.84	0.4381	0.4396	0.0014599
2119.32	0.4429	0.4394	-0.0034711
2122.8	0.4395	0.4393	-0.00020214
2126.28	0.4419	0.4392	-0.0027542
2129.76	0.4412	0.439	-0.0022054
2133.24	0.4421	0.4389	-0.0031952
2136.72	0.4395	0.4387	-0.00076633
2140.2	0.4379	0.4386	0.00073755
2143.68	0.4383	0.4385	0.00015341
2147.16	0.4428	0.4383	-0.0044773
2150.64	0.438	0.4382	0.00025115
2154.12	0.4361	0.4381	0.0019888
2157.6	0.4397	0.4379	-0.0017951
2161.08	0.4395	0.4378	-0.0016507
2164.56	0.4389	0.4377	-0.0012041
2168.04	0.4432	0.4375	-0.005634
2171.52	0.4383	0.4374	-0.00093185
2175	0.4451	0.4373	-0.0078163
2178.48	0.4366	0.4372	0.00054032
2181.96	0.4376	0.437	-0.00056802
2185.44	0.4402	0.4369	-0.0032597
2188.92	0.4362	0.4368	0.00058716
2192.4	0.4406	0.4366	-0.003977
2195.88	0.4389	0.4365	-0.0024186
2199.36	0.4435	0.4364	-0.007079
2202.84	0.4353	0.4362	0.00093428
2206.32	0.4377	0.4361	-0.0015363
2209.8	0.4415	0.436	-0.0055298
2213.28	0.4417	0.4359	-0.0058233
2216.76	0.435	0.4357	0.00074701
2220.24	0.4417	0.4356	-0.0061137
2223.72	0.4344	0.4355	0.0011215
2227.2	0.4319	0.4354	0.0034183
2230.68	0.4345	0.4352	0.00069851
2234.16	0.4343	0.4351	0.00084831
2237.64	0.4382	0.435	-0.0032081
2241.12	0.439	0.4349	-0.004184
2244.6	0.4366	0.4347	-0.0018938
2248.08	0.4357	0.4346	-0.0010609
2251.56	0.4398	0.4345	-0.005305
2255.04	0.4325	0.4344	0.0018334
2258.52	0.4314	0.4342	0.0028104
2262	0.4322	0.4341	0.0019391
2265.48	0.4313	0.434	0.0027334
2268.96	0.4292	0.4339	0.0046393
2272.44	0.43	0.4337	0.0037477
2275.92	0.4266	0.4336	0.0069972
2279.4	0.4403	0.4335	-0.0067525
2282.88	0.4372	0.4334	-0.0038702
2286.36	0.432	0.4333	0.0012764
2289.84	0.4311	0.4331	0.0019876
2293.32	0.4331	0.433	-0.0001086
2296.8	0.4314	0.4329	0.0015408
2300.28	0.431	0.4328	0.0017465
2303.76	0.4338	0.4327	-0.001104
2307.24	0.429	0.4325	0.0035028
2310.72	0.4348	0.4324	-0.0023526
2314.2	0.4279	0.4323	0.0043954
2317.68	0.4381	0.4322	-0.0058697
2321.16	0.4299	0.4321	0.0021816
2324.64	0.4287	0.4319	0.0032774
2328.12	0.4326	0.4318	-0.00076612
2331.6	0.4252	0.4317	0.0065412
2335.08	0.4325	0.4316	-0.00087021
2338.56	0.4296	0.4315	0.0018387
2342.04	0.4265	0.4314	0.0048439
2345.52	0.4304	0.4312	0.00088541
2349	0.426	0.4311	0.0051227
2352.48	0.4261	0.431	0.0048984
2355.96	0.4314	0.4309	-0.00053549
2359.44	0.4259	0.4308	0.0048525
2362.92	0.4262	0.4307	0.0044289
2366.4	0.4259	0.4306	0.0046607
2369.88	0.4275	0.4304	0.0029423
2373.36	0.424	0.4303	0.0062875
2376.84	0.4305	0.4302	-0.00025919
2380.32	0.4264	0.4301	0.0037301
2383.8	0.4286	0.43	0.0013961
2387.28	0.4273	0.4299	0.0026032
2390.76	0.4324	0.4298	-0.0026611
2394.24	0.4344	0.4297	-0.0047903
2397.72	0.4267	0.4295	0.002805
2401.2	0.4219	0.4294	0.0075149
2404.68	0.419	0.4293	0.0104
2408.16	0.4303	0.4292	-0.0010501
2411.64	0.4301	0.4291	-0.0010387
2415.12	0.4293	0.429	-0.0003139
2418.6	0.4232	0.4289	0.0056654
2422.08	0.438	0.4288	-0.0091981
2425.56	0.4277	0.4287	0.00096934
2429.04	0.4284	0.4285	0.00017189
2432.52	0.4296	0.4284	-0.0011277
2436	0.4231	0.4283	0.005234
2439.48	0.4337	0.4282	-0.0054717
2442.96	0.4308	0.4281	-0.0026472
2446.44	0.4368	0.428	-0.008823
2449.92	0.4283	0.4279	-0.00038319
2453.4	0.4276	0.4278	0.00013657
2456.88	0.4248	0.4277	0.0029067
2460.36	0.4278	0.4276	-0.00022195
2463.84	0.4234	0.4275	0.0040372
2467.32	0.4238	0.4274	0.0035727
2470.8	0.424	0.4272	0.0032001
2474.28	0.4325	0.4271	-0.0053625
2477.76	0.4301	0.427	-0.0030688
2481.24	0.4233	0.4269	0.0035938
2484.72	0.4238	0.4268	0.0030214
2488.2	0.4247	0.4267	0.0020051
2491.68	0.433	0.4266	-0.006433
2495.16	0.4294	0.4265	-0.0029023
2498.64	0.4348	0.4264	-0.0084433
2502.12	0.4317	0.4263	-0.0053757
2505.6	0.4215	0.4262	0.004668
2509.08	0.4285	0.4261	-0.0024316
2512.56	0.4257	0.426	0.00029
2516.04	0.4324	0.4259	-0.0064875
2519.52	0.4335	0.4258	-0.007721
2523	0.4267	0.4257	-0.00097852
2526.48	0.4273	0.4256	-0.0017719
2529.96	0.4291	0.4255	-0.0036043
2533.44	0.4267	0.4254	-0.0012834
2536.92	0.4316	0.4253	-0.0063124
2540.4	0.4297	0.4252	-0.0045805
2543.88	0.4273	0.4251	-0.0022303
2547.36	0.4225	0.425	0.0024807
2550.84	0.4214	0.4249	0.0034195
2554.32	0.4296	0.4248	-0.0048359
2557.8	0.4275	0.4247	-0.0028868
2561.28	0.4268	0.4246	-0.0022728
2564.76	0.4189	0.4245	0.0055541
2568.24	0.4312	0.4244	-0.0068884
2571.72	0.4248	0.4243	-0.00055218
2575.2	0.4282	0.4242	-0.0040174
2578.68	0.4277	0.4241	-0.0036196
2582.16	0.4277	0.424	-0.0037796
2585.64	0.4206	0.4239	0.0032646
2589.12	0.422	0.4238	0.00175
2592.6	0.4281	0.4237	-0.0044414
2596.08	0.4224	0.4236	0.0011719
2599.56	0.422	0.4235	0.0015102
2603.04	0.4208	0.4234	0.0025239
2606.52	0.4211	0.4233	0.0021713
2610	0.4228	0.4232	0.00040307
2613.48	0.434	0.4231	-0.0109
2616.96	0.428	0.423	-0.0050207
2620.44	0.4234	0.4229	-0.0005439
2623.92	0.428	0.4228	-0.0051757
2627.4	0.4322	0.4227	-0.0094927
2630.88	0.4206	0.4226	0.0020151
2634.36	0.4212	0.4225	0.0013345
2637.84	0.4294	0.4224	-0.0070222
2641.32	0.4239	0.4223	-0.0015947
2644.8	0.4236	0.4222	-0.0014273
2648.28	0.4323	0.4221	-0.0102
2651.76	0.4217	0.422	0.00030429
2655.24	0.4231	0.4219	-0.0011762
2658.72	0.4142	0.4218	0.0076232
2662.2	0.4286	0.4217	-0.0068763
2665.68	0.4207	0.4216	0.00099009
2669.16	0.421	0.4215	0.00057079
2672.64	0.4275	0.4215	-0.0060452
2676.12	0.4194	0.4214	0.0019555
2679.6	0.4216	0.4213	-0.00030429
2683.08	0.4282	0.4212	-0.0070273
2686.56	0.4216	0.4211	-0.00049561
2690.04	0.4251	0.421	-0.0041294
2693.52	0.4306	0.4209	-0.0097082
2697	0.4225	0.4208	-0.0016671
2700.48	0.4265	0.4207	-0.0058059
2703.96	0.424	0.4206	-0.0034203
2707.44	0.4278	0.4205	-0.0073013
2710.92	0.4299	0.4204	-0.0095067
2714.4	0.4235	0.4203	-0.0031688
2717.88	0.4221	0.4203	-0.0018227
2721.36	0.4225	0.4202	-0.0023789
2724.84	0.4252	0.4201	-0.0051613
2728.32	0.4147	0.42	0.0052611
2731.8	0.4254	0.4199	-0.0054992
2735.28	0.4192	0.4198	0.00055456
2738.76	0.4181	0.4197	0.0016103
2742.24	0.4156	0.4196	0.0039938
2745.72	0.425	0.4195	-0.0054338
2749.2	0.4145	0.4194	0.0049669
2752.68	0.4192	0.4193	0.00014961
2756.16	0.4216	0.4193	-0.0023177
2759.64	0.4168	0.4192	0.0023845
2763.12	0.4208	0.4191	-0.0017574
2766.6	0.4188	0.419	0.00014685
2770.08	0.4254	0.4189	-0.0064648
2773.56	0.4226	0.4188	-0.0038174
2777.04	0.4276	0.4187	-0.0089066
2780.52	0.4221	0.4186	-0.0034731
2784	0.4252	0.4186	-0.0066218
2787.48	0.4145	0.4185	0.0039517
2790.96	0.4184	0.4184	1.8069e-05
2794.44	0.4159	0.4183	0.0024032
2797.92	0.4215	0.4182	-0.0032641
2801.4	0.4239	0.4181	-0.0057448
2804.88	0.4195	0.418	-0.0015095
2808.36	0.4119	0.4179	0.0060424
2811.84	0.4188	0.4179	-0.0009303
2815.32	0.4152	0.4178	0.0025388
2818.8	0.4213	0.4177	-0.003589
2822.28	0.4121	0.4176	0.0054467
2825.76	0.4102	0.4175	0.0073513
2829.24	0.4297	0.4174	-0.0123
2832.72	0.4215	0.4173	-0.0041324
2836.2	0.416	0.4173	0.0012552
2839.68	0.4188	0.4172	-0.0016649
2843.16	0.4147	0.4171	0.0023566
2846.64	0.4195	0.417	-0.0024555
2850.12	0.4113	0.4169	0.005611
2853.6	0.4169	0.4168	-0.00010905
2857.08	0.423	0.4167	-0.0062185
2860.56	0.4187	0.4167	-0.0020472
2864.04	0.4063	0.4166	0.0103
2867.52	0.4161	0.4165	0.00038915
2871	0.4251	0.4164	-0.0086665
2874.48	0.4141	0.4163	0.0021872
2877.96	0.4139	0.4162	0.0023254
2881.44	0.4055	0.4162	0.0106
2884.92	0.409	0.4161	0.0071242
2888.4	0.4145	0.416	0.0014719
2891.88	0.415	0.4159	0.00095687
2895.36	0.4118	0.4158	0.0040796
2898.84	0.4022	0.4157	0.0136
2902.32	0.4058	0.4157	0.0099146
2905.8	0.4108	0.4156	0.0048305
2909.28	0.4169	0.4155	-0.0014274
2912.76	0.4148	0.4154	0.00067091
2916.24	0.3998	0.4153	0.0156
2919.72	0.4159	0.4153	-0.00067151
2923.2	0.4034	0.4152	0.0118
2926.68	0.4129	0.4151	0.0022252
2930.16	0.4184	0.415	-0.0033971
2933.64	0.423	0.4149	-0.0080741
2937.12	0.4082	0.4149	0.0066915
2940.6	0.423	0.4148	-0.0082245
2944.08	0.4227	0.4147	-0.0079771
2947.56	0.4056	0.4146	0.0090618
2951.04	0.4007	0.4145	0.0138
2954.52	0.4105	0.4145	0.0039887
2958	0.4088	0.4144	0.0056164
2961.48	0.4085	0.4143	0.0058155
2964.96	0.4065	0.4142	0.0077121
2968.44	0.4062	0.4141	0.007918
2971.92	0.3953	0.4141	0.0188
