# Supplementary material for: Microsecond sub-domain motions and the folding and misfolding of the mouse prion protein
Source: eLife. 2019 Apr 26;8:e44766. doi: 10.7554/eLife.44766 (PMC6516828; doi:10.7554/eLife.44766)
Supplement: Figure 3—source data 1. [file elife-44766-fig3-data1.xlsx]

## Sheet: Panel a
Time of unfolding (us)	Blue curve	Fit to blue curve	Red curve	Fit to red curve
-311.46	--	-0.0823	--	0.1765
-309.72	--	-0.0798	--	0.1773
-307.98	--	-0.0773	--	0.1781
-306.24	--	-0.0749	--	0.1789
-304.5	--	-0.0724	--	0.1797
-302.76	--	-0.07	--	0.1805
-301.02	--	-0.0675	--	0.1813
-299.28	--	-0.0651	--	0.1821
-297.54	--	-0.0627	--	0.1829
-295.8	--	-0.0602	--	0.1837
-294.06	--	-0.0578	--	0.1845
-292.32	--	-0.0554	--	0.1853
-290.58	--	-0.053	--	0.186
-288.84	--	-0.0506	--	0.1868
-287.1	--	-0.0482	--	0.1876
-285.36	--	-0.0458	--	0.1884
-283.62	--	-0.0434	--	0.1892
-281.88	--	-0.041	--	0.1899
-280.14	--	-0.0386	--	0.1907
-278.4	--	-0.0363	--	0.1915
-276.66	--	-0.0339	--	0.1923
-274.92	--	-0.0315	--	0.1931
-273.18	--	-0.0292	--	0.1938
-271.44	--	-0.0268	--	0.1946
-269.7	--	-0.0245	--	0.1954
-267.96	--	-0.0221	--	0.1961
-266.22	--	-0.0198	--	0.1969
-264.48	--	-0.0174	--	0.1977
-262.74	--	-0.0151	--	0.1984
-261	--	-0.0128	--	0.1992
-259.26	--	-0.0105	--	0.2
-257.52	--	-0.0081474	--	0.2007
-255.78	--	-0.0058367	--	0.2015
-254.04	--	-0.0035309	--	0.2023
-252.3	--	-0.0012299	--	0.203
-250.56	--	0.0010661	--	0.2038
-248.82	--	0.0033572	--	0.2045
-247.08	--	0.0056435	--	0.2053
-245.34	--	0.0079249	--	0.206
-243.6	--	0.0102	--	0.2068
-241.86	--	0.0125	--	0.2076
-240.12	--	0.0147	--	0.2083
-238.38	--	0.017	--	0.2091
-236.64	--	0.0193	--	0.2098
-234.9	--	0.0215	--	0.2106
-233.16	--	0.0238	--	0.2113
-231.42	--	0.026	--	0.212
-229.68	--	0.0282	--	0.2128
-227.94	--	0.0305	--	0.2135
-226.2	--	0.0327	--	0.2143
-224.46	--	0.0349	--	0.215
-222.72	--	0.0371	--	0.2158
-220.98	--	0.0394	--	0.2165
-219.24	--	0.0416	--	0.2172
-217.5	--	0.0438	--	0.218
-215.76	--	0.046	--	0.2187
-214.02	--	0.0482	--	0.2194
-212.28	--	0.0504	--	0.2202
-210.54	--	0.0525	--	0.2209
-208.8	--	0.0547	--	0.2216
-207.06	--	0.0569	--	0.2224
-205.32	--	0.0591	--	0.2231
-203.58	--	0.0612	--	0.2238
-201.84	--	0.0634	--	0.2246
-200.1	--	0.0656	--	0.2253
-198.36	--	0.0677	--	0.226
-196.62	--	0.0699	--	0.2267
-194.88	--	0.072	--	0.2275
-193.14	--	0.0742	--	0.2282
-191.4	--	0.0763	--	0.2289
-189.66	--	0.0784	--	0.2296
-187.92	--	0.0805	--	0.2303
-186.18	--	0.0827	--	0.2311
-184.44	--	0.0848	--	0.2318
-182.7	--	0.0869	--	0.2325
-180.96	--	0.089	--	0.2332
-179.22	--	0.0911	--	0.2339
-177.48	--	0.0932	--	0.2346
-175.74	--	0.0953	--	0.2354
-174	--	0.0974	--	0.2361
-172.26	--	0.0995	--	0.2368
-170.52	--	0.1016	--	0.2375
-168.78	--	0.1036	--	0.2382
-167.04	--	0.1057	--	0.2389
-165.3	--	0.1078	--	0.2396
-163.56	--	0.1098	--	0.2403
-161.82	--	0.1119	--	0.241
-160.08	--	0.114	--	0.2417
-158.34	--	0.116	--	0.2424
-156.6	--	0.1181	--	0.2431
-154.86	--	0.1201	--	0.2438
-153.12	--	0.1221	--	0.2445
-151.38	--	0.1242	--	0.2452
-149.64	--	0.1262	--	0.2459
-147.9	--	0.1282	--	0.2466
-146.16	--	0.1302	--	0.2473
-144.42	--	0.1323	--	0.248
-142.68	--	0.1343	--	0.2487
-140.94	--	0.1363	--	0.2494
-139.2	--	0.1383	--	0.2501
-137.46	--	0.1403	--	0.2507
-135.72	--	0.1423	--	0.2514
-133.98	--	0.1443	--	0.2521
-132.24	--	0.1463	--	0.2528
-130.5	--	0.1482	--	0.2535
-128.76	--	0.1502	--	0.2542
-127.02	--	0.1522	--	0.2549
-125.28	--	0.1542	--	0.2555
-123.54	--	0.1561	--	0.2562
-121.8	--	0.1581	--	0.2569
-120.06	--	0.16	--	0.2576
-118.32	--	0.162	--	0.2582
-116.58	--	0.1639	--	0.2589
-114.84	--	0.1659	--	0.2596
-113.1	--	0.1678	--	0.2603
-111.36	--	0.1698	--	0.2609
-109.62	--	0.1717	--	0.2616
-107.88	--	0.1736	--	0.2623
-106.14	--	0.1756	--	0.263
-104.4	--	0.1775	--	0.2636
-102.66	--	0.1794	--	0.2643
-100.92	--	0.1813	--	0.265
-99.18	--	0.1832	--	0.2656
-97.44	--	0.1851	--	0.2663
-95.7	--	0.187	--	0.267
-93.96	--	0.1889	--	0.2676
-92.22	--	0.1908	--	0.2683
-90.48	--	0.1927	--	0.269
-88.74	--	0.1946	--	0.2696
-87	--	0.1964	--	0.2703
-85.26	--	0.1983	--	0.2709
-83.52	--	0.2002	--	0.2716
-81.78	--	0.2021	--	0.2722
-80.04	--	0.2039	--	0.2729
-78.3	--	0.2058	--	0.2736
-76.56	--	0.2076	--	0.2742
-74.82	--	0.2095	--	0.2749
-73.08	--	0.2113	--	0.2755
-71.34	--	0.2132	--	0.2762
-69.6	--	0.215	--	0.2768
-67.86	--	0.2169	--	0.2775
-66.12	--	0.2187	--	0.2781
-64.38	--	0.2205	--	0.2788
-62.64	--	0.2223	--	0.2794
-60.9	--	0.2242	--	0.28
-59.16	--	0.226	--	0.2807
-57.42	--	0.2278	--	0.2813
-55.68	--	0.2296	--	0.282
-53.94	--	0.2314	--	0.2826
-52.2	--	0.2332	--	0.2833
-50.46	--	0.235	--	0.2839
-48.72	--	0.2368	--	0.2845
-46.98	--	0.2386	--	0.2852
-45.24	--	0.2404	--	0.2858
-43.5	--	0.2422	--	0.2864
-41.76	--	0.2439	--	0.2871
-40.02	--	0.2457	--	0.2877
-38.28	--	0.2475	--	0.2883
-36.54	--	0.2492	--	0.289
-34.8	--	0.251	--	0.2896
-33.06	--	0.2528	--	0.2902
-31.32	--	0.2545	--	0.2909
-29.58	--	0.2563	--	0.2915
-27.84	--	0.258	--	0.2921
-26.1	--	0.2598	--	0.2927
-24.36	--	0.2615	--	0.2934
-22.62	--	0.2632	--	0.294
-20.88	--	0.265	--	0.2946
-19.14	--	0.2667	--	0.2952
-17.4	--	0.2684	--	0.2959
-15.66	--	0.2702	--	0.2965
-13.92	--	0.2719	--	0.2971
-12.18	--	0.2736	--	0.2977
-10.44	--	0.2753	--	0.2983
-8.7	--	0.277	--	0.299
-6.96	--	0.2787	--	0.2996
-5.22	--	0.2804	--	0.3002
-3.48	--	0.2821	--	0.3008
-1.74	--	0.2838	--	0.3014
0	--	0.2855	--	0.302
1.74	--	0.2872	--	0.3026
3.48	--	0.2889	--	0.3033
5.22	--	0.2905	--	0.3039
6.96	--	0.2922	--	0.3045
8.7	--	0.2939	--	0.3051
10.44	--	0.2956	--	0.3057
12.18	--	0.2972	--	0.3063
13.92	--	0.2989	--	0.3069
15.66	--	0.3005	--	0.3075
17.4	--	0.3022	--	0.3081
19.14	--	0.3038	--	0.3087
20.88	--	0.3055	--	0.3093
22.62	--	0.3071	--	0.3099
24.36	--	0.3088	--	0.3105
26.1	--	0.3104	--	0.3111
27.84	--	0.312	--	0.3117
29.58	--	0.3137	--	0.3123
31.32	--	0.3153	--	0.3129
33.06	--	0.3169	--	0.3135
34.8	--	0.3185	--	0.3141
36.54	0.3124	0.3201	--	0.3147
38.28	0.2895	0.3218	0.3477	0.3153
40.02	0.3051	0.3234	0.3069	0.3159
41.76	0.3239	0.325	0.3129	0.3165
43.5	0.3188	0.3266	0.3326	0.317
45.24	0.315	0.3282	0.3343	0.3176
46.98	0.3101	0.3298	0.323	0.3182
48.72	0.2637	0.3314	0.3481	0.3188
50.46	0.2545	0.333	0.2864	0.3194
52.2	0.2826	0.3345	0.2932	0.32
53.94	0.2792	0.3361	0.3017	0.3206
55.68	0.3305	0.3377	0.2497	0.3211
57.42	0.3558	0.3393	0.2777	0.3217
59.16	0.3157	0.3408	0.316	0.3223
60.9	0.3063	0.3424	0.3549	0.3229
62.64	0.3226	0.344	0.3822	0.3235
64.38	0.3255	0.3455	0.3008	0.3241
66.12	0.3311	0.3471	0.2946	0.3246
67.86	0.3278	0.3486	0.2767	0.3252
69.6	0.2952	0.3502	0.2701	0.3258
71.34	0.3328	0.3517	0.2762	0.3264
73.08	0.3137	0.3533	0.3171	0.3269
74.82	0.3321	0.3548	0.3089	0.3275
76.56	0.3431	0.3564	0.3401	0.3281
78.3	0.3394	0.3579	0.3409	0.3287
80.04	0.34	0.3594	0.3493	0.3292
81.78	0.3198	0.361	0.3392	0.3298
83.52	0.3636	0.3625	0.3471	0.3304
85.26	0.3861	0.364	0.3575	0.3309
87	0.3527	0.3655	0.3392	0.3315
88.74	0.3691	0.3671	0.3349	0.3321
90.48	0.3406	0.3686	0.3419	0.3326
92.22	0.3383	0.3701	0.3144	0.3332
93.96	0.3312	0.3716	0.3293	0.3338
95.7	0.3657	0.3731	0.3608	0.3343
97.44	0.3735	0.3746	0.3289	0.3349
99.18	0.3545	0.3761	0.3166	0.3355
100.92	0.3575	0.3776	0.3623	0.336
102.66	0.345	0.3791	0.3027	0.3366
104.4	0.3782	0.3805	0.2934	0.3371
106.14	0.4006	0.382	0.3086	0.3377
107.88	0.3416	0.3835	0.3136	0.3383
109.62	0.3341	0.385	0.3036	0.3388
111.36	0.3641	0.3865	0.3243	0.3394
113.1	0.3663	0.3879	0.3195	0.3399
114.84	0.3637	0.3894	0.3736	0.3405
116.58	0.3435	0.3909	0.3512	0.341
118.32	0.3702	0.3923	0.3484	0.3416
120.06	0.3494	0.3938	0.3286	0.3421
121.8	0.3762	0.3952	0.3408	0.3427
123.54	0.3269	0.3967	0.2953	0.3433
125.28	0.3622	0.3981	0.3311	0.3438
127.02	0.3783	0.3996	0.3428	0.3443
128.76	0.4052	0.401	0.3578	0.3449
130.5	0.3911	0.4025	0.3272	0.3454
132.24	0.4412	0.4039	0.3523	0.346
133.98	0.4325	0.4053	0.3282	0.3465
135.72	0.4206	0.4068	0.3462	0.3471
137.46	0.4234	0.4082	0.359	0.3476
139.2	0.4246	0.4096	0.3627	0.3482
140.94	0.4148	0.411	0.3812	0.3487
142.68	0.414	0.4125	0.3485	0.3493
144.42	0.4466	0.4139	0.3609	0.3498
146.16	0.4173	0.4153	0.3467	0.3503
147.9	0.4375	0.4167	0.3562	0.3509
149.64	0.4414	0.4181	0.3356	0.3514
151.38	0.4531	0.4195	0.3537	0.352
153.12	0.4283	0.4209	0.3496	0.3525
154.86	0.4323	0.4223	0.3676	0.353
156.6	0.4193	0.4237	0.349	0.3536
158.34	0.4501	0.4251	0.3303	0.3541
160.08	0.4313	0.4265	0.3604	0.3546
161.82	0.4479	0.4279	0.3655	0.3552
163.56	0.4282	0.4293	0.3705	0.3557
165.3	0.4121	0.4306	0.3795	0.3562
167.04	0.4338	0.432	0.3856	0.3568
168.78	0.4466	0.4334	0.3709	0.3573
170.52	0.436	0.4348	0.3358	0.3578
172.26	0.4625	0.4361	0.3517	0.3583
174	0.4594	0.4375	0.3447	0.3589
175.74	0.4452	0.4389	0.3456	0.3594
177.48	0.4791	0.4402	0.3511	0.3599
179.22	0.4677	0.4416	0.3844	0.3605
180.96	0.4774	0.4429	0.3872	0.361
182.7	0.4546	0.4443	0.356	0.3615
184.44	0.4596	0.4456	0.3928	0.362
186.18	0.4207	0.447	0.3761	0.3625
187.92	0.4423	0.4483	0.3736	0.3631
189.66	0.4797	0.4497	0.4028	0.3636
191.4	0.4906	0.451	0.3968	0.3641
193.14	0.4604	0.4523	0.3828	0.3646
194.88	0.4629	0.4537	0.3818	0.3651
196.62	0.454	0.455	0.3732	0.3657
198.36	0.4614	0.4563	0.3882	0.3662
200.1	0.5001	0.4576	0.3852	0.3667
201.84	0.4572	0.4589	0.3657	0.3672
203.58	0.4752	0.4603	0.3699	0.3677
205.32	0.4743	0.4616	0.3791	0.3682
207.06	0.4843	0.4629	0.3618	0.3688
208.8	0.4836	0.4642	0.3517	0.3693
210.54	0.4792	0.4655	0.3762	0.3698
212.28	0.486	0.4668	0.3815	0.3703
214.02	0.476	0.4681	0.363	0.3708
215.76	0.4699	0.4694	0.3927	0.3713
217.5	0.4881	0.4707	0.3953	0.3718
219.24	0.5175	0.472	0.4099	0.3723
220.98	0.4997	0.4733	0.3985	0.3728
222.72	0.5076	0.4746	0.406	0.3733
224.46	0.4978	0.4758	0.3765	0.3738
226.2	0.5048	0.4771	0.3751	0.3743
227.94	0.4898	0.4784	0.3558	0.3748
229.68	0.4929	0.4797	0.3639	0.3753
231.42	0.5086	0.481	0.3646	0.3759
233.16	0.5046	0.4822	0.3608	0.3764
234.9	0.5007	0.4835	0.3698	0.3769
236.64	0.5177	0.4848	0.3958	0.3774
238.38	0.5355	0.486	0.4008	0.3779
240.12	0.5173	0.4873	0.4099	0.3784
241.86	0.5288	0.4885	0.4026	0.3788
243.6	0.5033	0.4898	0.3815	0.3793
245.34	0.5069	0.491	0.3603	0.3798
247.08	0.4813	0.4923	0.3503	0.3803
248.82	0.4961	0.4935	0.3619	0.3808
250.56	0.529	0.4948	0.3868	0.3813
252.3	0.502	0.496	0.3803	0.3818
254.04	0.4901	0.4973	0.3665	0.3823
255.78	0.4933	0.4985	0.3849	0.3828
257.52	0.5051	0.4997	0.3794	0.3833
259.26	0.5442	0.501	0.417	0.3838
261	0.5163	0.5022	0.3815	0.3843
262.74	0.5202	0.5034	0.3941	0.3848
264.48	0.5219	0.5046	0.3809	0.3853
266.22	0.5129	0.5058	0.3795	0.3857
267.96	0.5179	0.5071	0.385	0.3862
269.7	0.5372	0.5083	0.4129	0.3867
271.44	0.504	0.5095	0.3687	0.3872
273.18	0.5281	0.5107	0.39	0.3877
274.92	0.5241	0.5119	0.3906	0.3882
276.66	0.523	0.5131	0.3863	0.3887
278.4	0.5334	0.5143	0.3848	0.3891
280.14	0.5445	0.5155	0.4035	0.3896
281.88	0.5284	0.5167	0.3866	0.3901
283.62	0.5477	0.5179	0.4227	0.3906
285.36	0.5539	0.5191	0.4189	0.3911
287.1	0.548	0.5203	0.3995	0.3915
288.84	0.5275	0.5215	0.3885	0.392
290.58	0.5452	0.5227	0.4071	0.3925
292.32	0.5299	0.5238	0.3837	0.393
294.06	0.5391	0.525	0.4085	0.3934
295.8	0.5391	0.5262	0.4003	0.3939
297.54	0.5412	0.5274	0.4078	0.3944
299.28	0.5528	0.5285	0.4141	0.3949
301.02	0.5254	0.5297	0.3769	0.3953
302.76	0.5403	0.5309	0.3991	0.3958
304.5	0.5669	0.532	0.4299	0.3963
306.24	0.5801	0.5332	0.4421	0.3968
307.98	0.542	0.5344	0.3919	0.3972
309.72	0.5442	0.5355	0.3769	0.3977
311.46	0.5697	0.5367	0.3764	0.3982
313.2	0.5673	0.5378	0.3658	0.3986
314.94	0.5809	0.539	0.4022	0.3991
316.68	0.5453	0.5401	0.3843	0.3996
318.42	0.5233	0.5413	0.3528	0.4
320.16	0.5279	0.5424	0.372	0.4005
321.9	0.5629	0.5435	0.388	0.401
323.64	0.5699	0.5447	0.391	0.4014
325.38	0.5538	0.5458	0.3811	0.4019
327.12	0.5457	0.5469	0.3857	0.4024
328.86	0.5536	0.5481	0.3672	0.4028
330.6	0.5467	0.5492	0.3941	0.4033
332.34	0.5375	0.5503	0.4055	0.4037
334.08	0.5565	0.5514	0.4052	0.4042
335.82	0.5778	0.5526	0.4153	0.4047
337.56	0.5859	0.5537	0.4182	0.4051
339.3	0.6031	0.5548	0.4303	0.4056
341.04	0.5869	0.5559	0.4241	0.406
342.78	0.5815	0.557	0.3993	0.4065
344.52	0.5775	0.5581	0.4083	0.4069
346.26	0.565	0.5592	0.3979	0.4074
348	0.5509	0.5603	0.3913	0.4079
349.74	0.5752	0.5614	0.3903	0.4083
351.48	0.5617	0.5625	0.4017	0.4088
353.22	0.58	0.5636	0.3938	0.4092
354.96	0.5766	0.5647	0.4247	0.4097
356.7	0.5789	0.5658	0.4204	0.4101
358.44	0.5837	0.5669	0.4169	0.4106
360.18	0.5783	0.568	0.3769	0.411
361.92	0.5751	0.5691	0.4034	0.4115
363.66	0.5595	0.5702	0.4125	0.4119
365.4	0.5628	0.5712	0.413	0.4124
367.14	0.5699	0.5723	0.4101	0.4128
368.88	0.5764	0.5734	0.3952	0.4133
370.62	0.5863	0.5745	0.4067	0.4137
372.36	0.5858	0.5755	0.405	0.4142
374.1	0.5842	0.5766	0.4154	0.4146
375.84	0.5956	0.5777	0.4385	0.415
377.58	0.5818	0.5787	0.4086	0.4155
379.32	0.5784	0.5798	0.4218	0.4159
381.06	0.5701	0.5809	0.3926	0.4164
382.8	0.5744	0.5819	0.3886	0.4168
384.54	0.5595	0.583	0.3874	0.4173
386.28	0.5657	0.584	0.3942	0.4177
388.02	0.5574	0.5851	0.3931	0.4181
389.76	0.5628	0.5861	0.4093	0.4186
391.5	0.5702	0.5872	0.4086	0.419
393.24	0.5877	0.5882	0.4315	0.4194
394.98	0.5784	0.5893	0.4203	0.4199
396.72	0.5973	0.5903	0.4355	0.4203
398.46	0.5981	0.5913	0.4106	0.4208
400.2	0.593	0.5924	0.4339	0.4212
401.94	0.5975	0.5934	0.4294	0.4216
403.68	0.5879	0.5944	0.4271	0.4221
405.42	0.6052	0.5955	0.4195	0.4225
407.16	0.6117	0.5965	0.4523	0.4229
408.9	0.6226	0.5975	0.4239	0.4234
410.64	0.6145	0.5985	0.4123	0.4238
412.38	0.6089	0.5995	0.4357	0.4242
414.12	0.5933	0.6006	0.4265	0.4246
415.86	0.6004	0.6016	0.4281	0.4251
417.6	0.5898	0.6026	0.4208	0.4255
419.34	0.5913	0.6036	0.4259	0.4259
421.08	0.584	0.6046	0.4256	0.4264
422.82	0.6128	0.6056	0.4263	0.4268
424.56	0.5895	0.6066	0.4088	0.4272
426.3	0.6017	0.6076	0.4137	0.4276
428.04	0.6063	0.6086	0.4225	0.4281
429.78	0.5837	0.6096	0.4168	0.4285
431.52	0.6053	0.6106	0.4175	0.4289
433.26	0.622	0.6116	0.4383	0.4293
435	0.6019	0.6126	0.4354	0.4297
436.74	0.6093	0.6136	0.4257	0.4302
438.48	0.6121	0.6146	0.4269	0.4306
440.22	0.5923	0.6156	0.4175	0.431
441.96	0.5993	0.6166	0.4114	0.4314
443.7	0.6205	0.6175	0.4128	0.4318
445.44	0.6077	0.6185	0.4296	0.4323
447.18	0.6246	0.6195	0.4496	0.4327
448.92	0.6234	0.6205	0.4315	0.4331
450.66	0.5856	0.6214	0.4076	0.4335
452.4	0.6188	0.6224	0.4275	0.4339
454.14	0.6402	0.6234	0.4316	0.4343
455.88	0.6508	0.6243	0.4527	0.4348
457.62	0.632	0.6253	0.4425	0.4352
459.36	0.6455	0.6263	0.4592	0.4356
461.1	0.6245	0.6272	0.436	0.436
462.84	0.6269	0.6282	0.4354	0.4364
464.58	0.6367	0.6292	0.4522	0.4368
466.32	0.6316	0.6301	0.4486	0.4372
468.06	0.6499	0.6311	0.4537	0.4376
469.8	0.6652	0.632	0.4508	0.4381
471.54	0.6456	0.633	0.4525	0.4385
473.28	0.6436	0.6339	0.4594	0.4389
475.02	0.6555	0.6348	0.4677	0.4393
476.76	0.6461	0.6358	0.4477	0.4397
478.5	0.6613	0.6367	0.4664	0.4401
480.24	0.6428	0.6377	0.4518	0.4405
481.98	0.6547	0.6386	0.4585	0.4409
483.72	0.6446	0.6395	0.4377	0.4413
485.46	0.6553	0.6405	0.4549	0.4417
487.2	0.6511	0.6414	0.4434	0.4421
488.94	0.6296	0.6423	0.4318	0.4425
490.68	0.6506	0.6433	0.4339	0.4429
492.42	0.6345	0.6442	0.4234	0.4433
494.16	0.6574	0.6451	0.4415	0.4437
495.9	0.672	0.646	0.4664	0.4441
497.64	0.6478	0.6469	0.4584	0.4445
499.38	0.6669	0.6479	0.4582	0.4449
501.12	0.6456	0.6488	0.4542	0.4453
502.86	0.6588	0.6497	0.4576	0.4457
504.6	0.6662	0.6506	0.4688	0.4461
506.34	0.6605	0.6515	0.4605	0.4465
508.08	0.6422	0.6524	0.4625	0.4469
509.82	0.6459	0.6533	0.4591	0.4473
511.56	0.6593	0.6542	0.4509	0.4477
513.3	0.6487	0.6551	0.4451	0.4481
515.04	0.673	0.656	0.4583	0.4485
516.78	0.6575	0.6569	0.4566	0.4489
518.52	0.6472	0.6578	0.4492	0.4493
520.26	0.6676	0.6587	0.4723	0.4497
522	0.6586	0.6596	0.4689	0.4501
523.74	0.6431	0.6605	0.4544	0.4505
525.48	0.6665	0.6614	0.4553	0.4509
527.22	0.6504	0.6623	0.4432	0.4512
528.96	0.667	0.6632	0.4515	0.4516
530.7	0.6817	0.664	0.4635	0.452
532.44	0.6691	0.6649	0.4766	0.4524
534.18	0.6611	0.6658	0.4551	0.4528
535.92	0.6833	0.6667	0.467	0.4532
537.66	0.6506	0.6675	0.4487	0.4536
539.4	0.6654	0.6684	0.4566	0.454
541.14	0.6886	0.6693	0.4741	0.4543
542.88	0.6827	0.6702	0.464	0.4547
544.62	0.6619	0.671	0.4688	0.4551
546.36	0.6822	0.6719	0.4545	0.4555
548.1	0.6723	0.6728	0.4615	0.4559
549.84	0.6697	0.6736	0.4548	0.4563
551.58	0.6827	0.6745	0.4676	0.4566
553.32	0.6632	0.6753	0.4453	0.457
555.06	0.6729	0.6762	0.4609	0.4574
556.8	0.6591	0.677	0.4506	0.4578
558.54	0.6679	0.6779	0.4489	0.4582
560.28	0.689	0.6787	0.4619	0.4585
562.02	0.6728	0.6796	0.4649	0.4589
563.76	0.6756	0.6804	0.4647	0.4593
565.5	0.702	0.6813	0.4755	0.4597
567.24	0.6985	0.6821	0.4613	0.4601
568.98	0.7109	0.683	0.477	0.4604
570.72	0.6958	0.6838	0.4796	0.4608
572.46	0.6677	0.6847	0.4662	0.4612
574.2	0.6654	0.6855	0.4572	0.4616
575.94	0.684	0.6863	0.466	0.4619
577.68	0.6953	0.6872	0.4819	0.4623
579.42	0.6995	0.688	0.4677	0.4627
581.16	0.6916	0.6888	0.464	0.463
582.9	0.6795	0.6896	0.4539	0.4634
584.64	0.6906	0.6905	0.4625	0.4638
586.38	0.689	0.6913	0.4535	0.4642
588.12	0.6863	0.6921	0.4483	0.4645
589.86	0.7011	0.6929	0.4778	0.4649
591.6	0.7079	0.6938	0.483	0.4653
593.34	0.7053	0.6946	0.4803	0.4656
595.08	0.7145	0.6954	0.4781	0.466
596.82	0.689	0.6962	0.4603	0.4664
598.56	0.694	0.697	0.4794	0.4667
600.3	0.6826	0.6978	0.4619	0.4671
602.04	0.6947	0.6986	0.4822	0.4675
603.78	0.6886	0.6994	0.4753	0.4678
605.52	0.7	0.7002	0.4625	0.4682
607.26	0.6984	0.701	0.4637	0.4686
609	0.6853	0.7018	0.4681	0.4689
610.74	0.7031	0.7026	0.483	0.4693
612.48	0.7121	0.7034	0.4945	0.4697
614.22	0.7192	0.7042	0.4755	0.47
615.96	0.6956	0.705	0.4814	0.4704
617.7	0.6949	0.7058	0.4689	0.4707
619.44	0.7087	0.7066	0.4758	0.4711
621.18	0.7109	0.7074	0.4777	0.4715
622.92	0.7056	0.7082	0.4748	0.4718
624.66	0.7037	0.709	0.4735	0.4722
626.4	0.7294	0.7098	0.481	0.4725
628.14	0.7203	0.7106	0.4981	0.4729
629.88	0.7069	0.7113	0.4875	0.4733
631.62	0.6882	0.7121	0.4635	0.4736
633.36	0.7228	0.7129	0.4827	0.474
635.1	0.6952	0.7137	0.473	0.4743
636.84	0.7127	0.7144	0.4749	0.4747
638.58	0.7384	0.7152	0.4883	0.475
640.32	0.7269	0.716	0.475	0.4754
642.06	0.7234	0.7168	0.4789	0.4757
643.8	0.6902	0.7175	0.4606	0.4761
645.54	0.7107	0.7183	0.4736	0.4764
647.28	0.7133	0.7191	0.4702	0.4768
649.02	0.7248	0.7198	0.4673	0.4771
650.76	0.7223	0.7206	0.474	0.4775
652.5	0.7152	0.7213	0.464	0.4778
654.24	0.7228	0.7221	0.4845	0.4782
655.98	0.7266	0.7229	0.4878	0.4785
657.72	0.7134	0.7236	0.482	0.4789
659.46	0.7295	0.7244	0.4888	0.4792
661.2	0.7297	0.7251	0.4925	0.4796
662.94	0.726	0.7259	0.4872	0.4799
664.68	0.7288	0.7266	0.4762	0.4803
666.42	0.7087	0.7274	0.4759	0.4806
668.16	0.7309	0.7281	0.4742	0.481
669.9	0.7144	0.7289	0.4664	0.4813
671.64	0.726	0.7296	0.4837	0.4817
673.38	0.7312	0.7303	0.4856	0.482
675.12	0.73	0.7311	0.4648	0.4824
676.86	0.7361	0.7318	0.4844	0.4827
678.6	0.7334	0.7326	0.4779	0.483
680.34	0.7243	0.7333	0.4692	0.4834
682.08	0.7312	0.734	0.4827	0.4837
683.82	0.7221	0.7348	0.4717	0.4841
685.56	0.7414	0.7355	0.4818	0.4844
687.3	0.7347	0.7362	0.4788	0.4847
689.04	0.7459	0.7369	0.4808	0.4851
690.78	0.7379	0.7377	0.4923	0.4854
692.52	0.748	0.7384	0.4965	0.4858
694.26	0.7463	0.7391	0.4942	0.4861
696	0.7499	0.7398	0.4801	0.4864
697.74	0.7417	0.7405	0.4787	0.4868
699.48	0.7201	0.7413	0.465	0.4871
701.22	0.7331	0.742	0.4787	0.4875
702.96	0.7633	0.7427	0.5091	0.4878
704.7	0.7592	0.7434	0.4964	0.4881
706.44	0.7396	0.7441	0.4756	0.4885
708.18	0.7461	0.7448	0.4922	0.4888
709.92	0.7346	0.7455	0.4631	0.4891
711.66	0.7353	0.7462	0.4761	0.4895
713.4	0.7323	0.7469	0.4792	0.4898
715.14	0.7409	0.7477	0.468	0.4901
716.88	0.7603	0.7484	0.4912	0.4905
718.62	0.7617	0.7491	0.4922	0.4908
720.36	0.7524	0.7498	0.4784	0.4911
722.1	0.736	0.7505	0.4758	0.4914
723.84	0.7369	0.7512	0.4857	0.4918
725.58	0.7402	0.7518	0.4873	0.4921
727.32	0.7344	0.7525	0.4798	0.4924
729.06	0.7342	0.7532	0.4844	0.4928
730.8	0.7343	0.7539	0.4819	0.4931
732.54	0.7436	0.7546	0.4922	0.4934
734.28	0.7505	0.7553	0.4946	0.4937
736.02	0.7511	0.756	0.4802	0.4941
737.76	0.7575	0.7567	0.4939	0.4944
739.5	0.7746	0.7574	0.509	0.4947
741.24	0.7554	0.758	0.494	0.495
742.98	0.7585	0.7587	0.5028	0.4954
744.72	0.7638	0.7594	0.5071	0.4957
746.46	0.7462	0.7601	0.4956	0.496
748.2	0.769	0.7607	0.5185	0.4963
749.94	0.7584	0.7614	0.5007	0.4967
751.68	0.7661	0.7621	0.4904	0.497
753.42	0.7527	0.7628	0.485	0.4973
755.16	0.7746	0.7634	0.4981	0.4976
756.9	0.7592	0.7641	0.4922	0.4979
758.64	0.7386	0.7648	0.4961	0.4983
760.38	0.7585	0.7654	0.5017	0.4986
762.12	0.7674	0.7661	0.5122	0.4989
763.86	0.7821	0.7668	0.5107	0.4992
765.6	0.753	0.7674	0.4999	0.4995
767.34	0.7377	0.7681	0.4729	0.4999
769.08	0.7458	0.7687	0.4777	0.5002
770.82	0.7642	0.7694	0.4931	0.5005
772.56	0.7545	0.7701	0.5049	0.5008
774.3	0.7596	0.7707	0.4967	0.5011
776.04	0.7471	0.7714	0.482	0.5014
777.78	0.7514	0.772	0.4909	0.5018
779.52	0.7622	0.7727	0.4917	0.5021
781.26	0.7604	0.7733	0.487	0.5024
783	0.7638	0.774	0.4879	0.5027
784.74	0.7543	0.7746	0.4917	0.503
786.48	0.7692	0.7753	0.5037	0.5033
788.22	0.7759	0.7759	0.4976	0.5036
789.96	0.7835	0.7765	0.5011	0.5039
791.7	0.7767	0.7772	0.5058	0.5043
793.44	0.7886	0.7778	0.5103	0.5046
795.18	0.7625	0.7785	0.4937	0.5049
796.92	0.7728	0.7791	0.5053	0.5052
798.66	0.7493	0.7797	0.4929	0.5055
800.4	0.7612	0.7804	0.4953	0.5058
802.14	0.7623	0.781	0.4944	0.5061
803.88	0.794	0.7816	0.511	0.5064
805.62	0.7615	0.7823	0.4834	0.5067
807.36	0.7718	0.7829	0.4943	0.507
809.1	0.7886	0.7835	0.4924	0.5073
810.84	0.7821	0.7841	0.491	0.5076
812.58	0.7671	0.7848	0.4981	0.508
814.32	0.7708	0.7854	0.4998	0.5083
816.06	0.7777	0.786	0.5074	0.5086
817.8	0.7641	0.7866	0.4957	0.5089
819.54	0.7911	0.7873	0.5096	0.5092
821.28	0.8066	0.7879	0.514	0.5095
823.02	0.7969	0.7885	0.504	0.5098
824.76	0.787	0.7891	0.5122	0.5101
826.5	0.7976	0.7897	0.5184	0.5104
828.24	0.7872	0.7903	0.515	0.5107
829.98	0.7896	0.7909	0.5179	0.511
831.72	0.7839	0.7916	0.5087	0.5113
833.46	0.7829	0.7922	0.5072	0.5116
835.2	0.8033	0.7928	0.5282	0.5119
836.94	0.7882	0.7934	0.5138	0.5122
838.68	0.7773	0.794	0.509	0.5125
840.42	0.7903	0.7946	0.5103	0.5128
842.16	0.7959	0.7952	0.5015	0.5131
843.9	0.7808	0.7958	0.5019	0.5134
845.64	0.8017	0.7964	0.5133	0.5137
847.38	0.7928	0.797	0.5128	0.514
849.12	0.7973	0.7976	0.514	0.5143
850.86	0.7807	0.7982	0.5123	0.5146
852.6	0.7929	0.7988	0.5192	0.5149
854.34	0.7913	0.7994	0.5196	0.5152
856.08	0.7956	0.8	0.5144	0.5154
857.82	0.775	0.8006	0.5072	0.5157
859.56	0.7968	0.8011	0.521	0.516
861.3	0.8005	0.8017	0.5128	0.5163
863.04	0.8076	0.8023	0.5229	0.5166
864.78	0.7868	0.8029	0.5074	0.5169
866.52	0.7783	0.8035	0.493	0.5172
868.26	0.7959	0.8041	0.5068	0.5175
870	0.8125	0.8047	0.5185	0.5178
871.74	0.803	0.8052	0.5186	0.5181
873.48	0.8138	0.8058	0.5216	0.5184
875.22	0.7952	0.8064	0.5382	0.5187
876.96	0.8105	0.807	0.5191	0.5189
878.7	0.8179	0.8076	0.5279	0.5192
880.44	0.8055	0.8081	0.5194	0.5195
882.18	0.7879	0.8087	0.5059	0.5198
883.92	0.8091	0.8093	0.5227	0.5201
885.66	0.8058	0.8098	0.5338	0.5204
887.4	0.8172	0.8104	0.5365	0.5207
889.14	0.8236	0.811	0.5475	0.521
890.88	0.7972	0.8116	0.5218	0.5212
892.62	0.7919	0.8121	0.5141	0.5215
894.36	0.8007	0.8127	0.5089	0.5218
896.1	0.8208	0.8132	0.5251	0.5221
897.84	0.8194	0.8138	0.5339	0.5224
899.58	0.8189	0.8144	0.5353	0.5227
901.32	0.8102	0.8149	0.5252	0.5229
903.06	0.8132	0.8155	0.5224	0.5232
904.8	0.8178	0.816	0.5326	0.5235
906.54	0.808	0.8166	0.5262	0.5238
908.28	0.7968	0.8172	0.5109	0.5241
910.02	0.8191	0.8177	0.5161	0.5244
911.76	0.8238	0.8183	0.5308	0.5246
913.5	0.8196	0.8188	0.5224	0.5249
915.24	0.8399	0.8194	0.5489	0.5252
916.98	0.834	0.8199	0.5292	0.5255
918.72	0.8276	0.8205	0.5179	0.5258
920.46	0.8355	0.821	0.5356	0.526
922.2	0.8083	0.8216	0.5207	0.5263
923.94	0.827	0.8221	0.5298	0.5266
925.68	0.8344	0.8227	0.5461	0.5269
927.42	0.8218	0.8232	0.5346	0.5271
929.16	0.8119	0.8237	0.5302	0.5274
930.9	0.8408	0.8243	0.5361	0.5277
932.64	0.8351	0.8248	0.5311	0.528
934.38	0.8291	0.8254	0.5231	0.5283
936.12	0.8146	0.8259	0.5201	0.5285
937.86	0.8046	0.8264	0.5195	0.5288
939.6	0.8141	0.827	0.5261	0.5291
941.34	0.812	0.8275	0.536	0.5293
943.08	0.8236	0.828	0.552	0.5296
944.82	0.827	0.8286	0.5487	0.5299
946.56	0.814	0.8291	0.5389	0.5302
948.3	0.8214	0.8296	0.5402	0.5304
950.04	0.8374	0.8301	0.5449	0.5307
951.78	0.815	0.8307	0.5325	0.531
953.52	0.8145	0.8312	0.5328	0.5313
955.26	0.8173	0.8317	0.529	0.5315
957	0.8222	0.8323	0.5248	0.5318
958.74	0.8165	0.8328	0.5318	0.5321
960.48	0.8063	0.8333	0.522	0.5323
962.22	0.8098	0.8338	0.5418	0.5326
963.96	0.8141	0.8343	0.5231	0.5329
965.7	0.8324	0.8349	0.5337	0.5331
967.44	0.8195	0.8354	0.5313	0.5334
969.18	0.8069	0.8359	0.5248	0.5337
970.92	0.8205	0.8364	0.5168	0.5339
972.66	0.8371	0.8369	0.5417	0.5342
974.4	0.8456	0.8374	0.5454	0.5345
976.14	0.8301	0.8379	0.535	0.5347
977.88	0.8234	0.8384	0.5423	0.535
979.62	0.8278	0.839	0.5292	0.5353
981.36	0.8473	0.8395	0.5423	0.5355
983.1	0.8271	0.84	0.531	0.5358
984.84	0.8346	0.8405	0.5397	0.5361
986.58	0.8448	0.841	0.5447	0.5363
988.32	0.872	0.8415	0.5661	0.5366
990.06	0.8619	0.842	0.5509	0.5368
991.8	0.847	0.8425	0.5352	0.5371
993.54	0.8441	0.843	0.5423	0.5374
995.28	0.8469	0.8435	0.5544	0.5376
997.02	0.8504	0.844	0.5416	0.5379
998.76	0.8236	0.8445	0.5275	0.5382
1000.5	0.8335	0.845	0.5284	0.5384
1002.24	0.8281	0.8455	0.526	0.5387
1003.98	0.8277	0.846	0.532	0.5389
1005.72	0.8358	0.8465	0.539	0.5392
1007.46	0.854	0.847	0.5472	0.5395
1009.2	0.8499	0.8474	0.5303	0.5397
1010.94	0.8487	0.8479	0.5378	0.54
1012.68	0.8406	0.8484	0.527	0.5402
1014.42	0.8388	0.8489	0.5229	0.5405
1016.16	0.8431	0.8494	0.5335	0.5407
1017.9	0.8515	0.8499	0.5342	0.541
1019.64	0.8292	0.8504	0.535	0.5413
1021.38	0.8329	0.8509	0.5285	0.5415
1023.12	0.8504	0.8513	0.5532	0.5418
1024.86	0.8507	0.8518	0.5579	0.542
1026.6	0.8575	0.8523	0.565	0.5423
1028.34	0.8454	0.8528	0.5331	0.5425
1030.08	0.8559	0.8533	0.5322	0.5428
1031.82	0.8544	0.8537	0.5576	0.543
1033.56	0.8497	0.8542	0.5453	0.5433
1035.3	0.8653	0.8547	0.5533	0.5435
1037.04	0.826	0.8552	0.5261	0.5438
1038.78	0.854	0.8556	0.5326	0.544
1040.52	0.8411	0.8561	0.5383	0.5443
1042.26	0.8006	0.8566	0.52	0.5445
1044	0.8396	0.8571	0.5414	0.5448
1045.74	0.8469	0.8575	0.5508	0.545
1047.48	0.8467	0.858	0.5512	0.5453
1049.22	0.8328	0.8585	0.5372	0.5455
1050.96	0.8566	0.8589	0.5482	0.5458
1052.7	0.8509	0.8594	0.5465	0.546
1054.44	0.8515	0.8599	0.556	0.5463
1056.18	0.8327	0.8603	0.5318	0.5465
1057.92	0.8284	0.8608	0.528	0.5468
1059.66	0.8394	0.8612	0.5332	0.547
1061.4	0.8595	0.8617	0.5422	0.5473
1063.14	0.862	0.8622	0.5398	0.5475
1064.88	0.8544	0.8626	0.5441	0.5478
1066.62	0.8542	0.8631	0.5535	0.548
1068.36	0.8788	0.8635	0.57	0.5483
1070.1	0.8527	0.864	0.5366	0.5485
1071.84	0.8385	0.8644	0.5277	0.5488
1073.58	0.8305	0.8649	0.55	0.549
1075.32	0.847	0.8654	0.5458	0.5492
1077.06	0.8574	0.8658	0.5403	0.5495
1078.8	0.84	0.8663	0.5445	0.5497
1080.54	0.8525	0.8667	0.5436	0.55
1082.28	0.8583	0.8672	0.5453	0.5502
1084.02	0.8459	0.8676	0.5497	0.5505
1085.76	0.8341	0.8681	0.544	0.5507
1087.5	0.8554	0.8685	0.5508	0.5509
1089.24	0.8587	0.8689	0.5451	0.5512
1090.98	0.8552	0.8694	0.5511	0.5514
1092.72	0.8554	0.8698	0.557	0.5517
1094.46	0.8503	0.8703	0.5382	0.5519
1096.2	0.8439	0.8707	0.5527	0.5521
1097.94	0.8388	0.8712	0.536	0.5524
1099.68	0.8306	0.8716	0.5297	0.5526
1101.42	0.8625	0.872	0.544	0.5529
1103.16	0.8708	0.8725	0.5462	0.5531
1104.9	0.8873	0.8729	0.5718	0.5533
1106.64	0.8576	0.8733	0.5503	0.5536
1108.38	0.8544	0.8738	0.5473	0.5538
1110.12	0.8798	0.8742	0.561	0.554
1111.86	0.8706	0.8746	0.5531	0.5543
1113.6	0.8742	0.8751	0.5492	0.5545
1115.34	0.8827	0.8755	0.5501	0.5548
1117.08	0.8783	0.8759	0.5643	0.555
1118.82	0.897	0.8764	0.5594	0.5552
1120.56	0.8798	0.8768	0.5712	0.5555
1122.3	0.8767	0.8772	0.5648	0.5557
1124.04	0.8562	0.8777	0.5569	0.5559
1125.78	0.8747	0.8781	0.5557	0.5562
1127.52	0.8731	0.8785	0.5521	0.5564
1129.26	0.8666	0.8789	0.5475	0.5566
1131	0.8672	0.8793	0.563	0.5569
1132.74	0.8871	0.8798	0.5604	0.5571
1134.48	0.8756	0.8802	0.5527	0.5573
1136.22	0.8826	0.8806	0.5608	0.5576
1137.96	0.8773	0.881	0.5479	0.5578
1139.7	0.8715	0.8815	0.5461	0.558
1141.44	0.8784	0.8819	0.5438	0.5583
1143.18	0.8677	0.8823	0.544	0.5585
1144.92	0.8612	0.8827	0.5442	0.5587
1146.66	0.8748	0.8831	0.5577	0.5589
1148.4	0.8626	0.8835	0.5447	0.5592
1150.14	0.8581	0.8839	0.5389	0.5594
1151.88	0.896	0.8844	0.5698	0.5596
1153.62	0.8911	0.8848	0.5513	0.5599
1155.36	0.8548	0.8852	0.5418	0.5601
1157.1	0.8655	0.8856	0.5416	0.5603
1158.84	0.889	0.886	0.5613	0.5605
1160.58	0.88	0.8864	0.5364	0.5608
1162.32	0.8593	0.8868	0.5426	0.561
1164.06	0.8734	0.8872	0.5679	0.5612
1165.8	0.8616	0.8876	0.5406	0.5614
1167.54	0.8676	0.888	0.5556	0.5617
1169.28	0.8772	0.8884	0.5525	0.5619
1171.02	0.8683	0.8888	0.5491	0.5621
1172.76	0.9154	0.8892	0.5558	0.5623
1174.5	0.8707	0.8896	0.5382	0.5626
1176.24	0.8838	0.89	0.5482	0.5628
1177.98	0.8948	0.8904	0.5785	0.563
1179.72	0.8816	0.8908	0.5552	0.5632
1181.46	0.9	0.8912	0.5675	0.5635
1183.2	0.8939	0.8916	0.564	0.5637
1184.94	0.8931	0.892	0.5594	0.5639
1186.68	0.9271	0.8924	0.5962	0.5641
1188.42	0.9197	0.8928	0.5692	0.5644
1190.16	0.8818	0.8932	0.5528	0.5646
1191.9	0.8876	0.8936	0.5696	0.5648
1193.64	0.8954	0.894	0.5606	0.565
1195.38	0.8863	0.8944	0.5616	0.5652
1197.12	0.8997	0.8948	0.5816	0.5655
1198.86	0.9294	0.8952	0.6017	0.5657
1200.6	0.8956	0.8956	0.5591	0.5659
1202.34	0.9004	0.8959	0.5623	0.5661
1204.08	0.913	0.8963	0.5653	0.5663
1205.82	0.8991	0.8967	0.5774	0.5665
1207.56	0.9093	0.8971	0.5879	0.5668
1209.3	0.8936	0.8975	0.5738	0.567
1211.04	0.905	0.8979	0.5784	0.5672
1212.78	0.896	0.8983	0.5618	0.5674
1214.52	0.9041	0.8986	0.5755	0.5676
1216.26	0.8858	0.899	0.5607	0.5679
1218	0.8814	0.8994	0.5582	0.5681
1219.74	0.8894	0.8998	0.5657	0.5683
1221.48	0.8809	0.9002	0.5562	0.5685
1223.22	0.8879	0.9005	0.5475	0.5687
1224.96	0.8816	0.9009	0.5677	0.5689
1226.7	0.898	0.9013	0.5722	0.5691
1228.44	0.9238	0.9017	0.5902	0.5694
1230.18	0.8975	0.902	0.5676	0.5696
1231.92	0.9146	0.9024	0.5812	0.5698
1233.66	0.8977	0.9028	0.5586	0.57
1235.4	0.8826	0.9032	0.5451	0.5702
1237.14	0.8971	0.9035	0.5717	0.5704
1238.88	0.9036	0.9039	0.5569	0.5706
1240.62	0.9108	0.9043	0.5982	0.5708
1242.36	0.8906	0.9046	0.5541	0.5711
1244.1	0.9033	0.905	0.5754	0.5713
1245.84	0.8906	0.9054	0.5626	0.5715
1247.58	0.9201	0.9057	0.5705	0.5717
1249.32	0.9056	0.9061	0.57	0.5719
1251.06	0.9257	0.9065	0.5851	0.5721
1252.8	0.8904	0.9068	0.5669	0.5723
1254.54	0.9084	0.9072	0.5775	0.5725
1256.28	0.8844	0.9076	0.5643	0.5727
1258.02	0.9094	0.9079	0.568	0.5729
1259.76	0.891	0.9083	0.5656	0.5732
1261.5	0.909	0.9086	0.5826	0.5734
1263.24	0.9219	0.909	0.5661	0.5736
1264.98	0.8978	0.9094	0.5601	0.5738
1266.72	0.9206	0.9097	0.5662	0.574
1268.46	0.8788	0.9101	0.5501	0.5742
1270.2	0.9209	0.9104	0.5776	0.5744
1271.94	0.9042	0.9108	0.5785	0.5746
1273.68	0.9067	0.9111	0.5872	0.5748
1275.42	0.8966	0.9115	0.559	0.575
1277.16	0.8848	0.9119	0.5565	0.5752
1278.9	0.9151	0.9122	0.5666	0.5754
1280.64	0.9166	0.9126	0.5686	0.5756
1282.38	0.9218	0.9129	0.5719	0.5758
1284.12	0.932	0.9133	0.5762	0.576
1285.86	0.9361	0.9136	0.5958	0.5762
1287.6	0.908	0.914	0.5685	0.5765
1289.34	0.8695	0.9143	0.5542	0.5767
1291.08	0.9107	0.9147	0.5818	0.5769
1292.82	0.9221	0.915	0.6001	0.5771
1294.56	0.9168	0.9154	0.574	0.5773
1296.3	0.9087	0.9157	0.5723	0.5775
1298.04	0.8884	0.916	0.5724	0.5777
1299.78	0.8733	0.9164	0.5594	0.5779
1301.52	0.9216	0.9167	0.5834	0.5781
1303.26	0.9031	0.9171	0.5656	0.5783
1305	0.9213	0.9174	0.5612	0.5785
1306.74	0.9133	0.9178	0.5738	0.5787
1308.48	0.9242	0.9181	0.5705	0.5789
1310.22	0.9531	0.9184	0.6068	0.5791
1311.96	0.9149	0.9188	0.5792	0.5793
1313.7	0.9138	0.9191	0.5787	0.5795
1315.44	0.9276	0.9194	0.5751	0.5797
1317.18	0.9243	0.9198	0.6056	0.5799
1318.92	0.9523	0.9201	0.6144	0.5801
1320.66	0.9322	0.9205	0.5824	0.5803
1322.4	0.9342	0.9208	0.5661	0.5805
1324.14	0.8871	0.9211	0.5421	0.5807
1325.88	0.9103	0.9215	0.5766	0.5809
1327.62	0.9239	0.9218	0.5723	0.581
1329.36	0.9536	0.9221	0.5984	0.5812
1331.1	0.9104	0.9225	0.5672	0.5814
1332.84	0.8932	0.9228	0.5695	0.5816
1334.58	0.9307	0.9231	0.5925	0.5818
1336.32	0.9437	0.9234	0.594	0.582
1338.06	0.9384	0.9238	0.5895	0.5822
1339.8	0.9092	0.9241	0.5646	0.5824
1341.54	0.9272	0.9244	0.581	0.5826
1343.28	0.9216	0.9248	0.5786	0.5828
1345.02	0.909	0.9251	0.5848	0.583
1346.76	0.8925	0.9254	0.5673	0.5832
1348.5	0.8754	0.9257	0.5476	0.5834
1350.24	0.9163	0.9261	0.5575	0.5836
1351.98	0.9227	0.9264	0.5679	0.5838
1353.72	0.9655	0.9267	0.5969	0.584
1355.46	0.9374	0.927	0.5744	0.5842
1357.2	0.9386	0.9273	0.5786	0.5843
1358.94	0.9672	0.9277	0.5966	0.5845
1360.68	0.9497	0.928	0.5931	0.5847
1362.42	0.9347	0.9283	0.5925	0.5849
1364.16	0.9584	0.9286	0.5857	0.5851
1365.9	0.9152	0.9289	0.5719	0.5853
1367.64	0.9276	0.9292	0.569	0.5855
1369.38	0.9561	0.9296	0.5989	0.5857
1371.12	0.9318	0.9299	0.5846	0.5859
1372.86	0.926	0.9302	0.558	0.5861
1374.6	0.9402	0.9305	0.5762	0.5863
1376.34	0.9015	0.9308	0.5562	0.5864
1378.08	0.9224	0.9311	0.5763	0.5866
1379.82	0.9359	0.9314	0.5786	0.5868
1381.56	0.9587	0.9318	0.5927	0.587
1383.3	0.9287	0.9321	0.5752	0.5872
1385.04	0.952	0.9324	0.6116	0.5874
1386.78	0.9364	0.9327	0.5805	0.5876
1388.52	1.0035	0.933	0.6456	0.5878
1390.26	0.9415	0.9333	0.5817	0.5879
1392	0.9411	0.9336	0.5919	0.5881
1393.74	0.9325	0.9339	0.5941	0.5883
1395.48	0.8949	0.9342	0.5617	0.5885
1397.22	0.9098	0.9345	0.5825	0.5887
1398.96	0.947	0.9348	0.601	0.5889
1400.7	0.9636	0.9351	0.605	0.5891
1402.44	0.9426	0.9354	0.5974	0.5892
1404.18	0.9567	0.9357	0.562	0.5894
1405.92	0.9267	0.936	0.5893	0.5896
1407.66	0.9143	0.9363	0.5701	0.5898
1409.4	0.9039	0.9366	0.5848	0.59
1411.14	0.988	0.9369	0.6363	0.5902
1412.88	0.9689	0.9372	0.5938	0.5903
1414.62	0.9178	0.9375	0.5811	0.5905
1416.36	0.9718	0.9378	0.6033	0.5907
1418.1	0.9536	0.9381	0.5923	0.5909
1419.84	0.9345	0.9384	0.6054	0.5911
1421.58	0.9644	0.9387	0.5953	0.5912
1423.32	0.9434	0.939	0.5978	0.5914
1425.06	0.9873	0.9393	0.63	0.5916
1426.8	0.9392	0.9396	0.5702	0.5918
1428.54	0.9728	0.9399	0.6026	0.592
1430.28	0.966	0.9402	0.5965	0.5921
1432.02	0.9887	0.9405	0.6338	0.5923
1433.76	0.9732	0.9408	0.607	0.5925
1435.5	0.9518	0.9411	0.6234	0.5927
1437.24	1.0046	0.9414	0.6318	0.5929
1438.98	1.0143	0.9417	0.6159	0.593
1440.72	0.951	0.942	0.5822	0.5932
1442.46	0.9516	0.9422	0.6108	0.5934
1444.2	0.9863	0.9425	0.6057	0.5936
1445.94	0.9498	0.9428	0.5832	0.5938
1447.68	0.9397	0.9431	0.5716	0.5939
1449.42	0.9866	0.9434	0.6118	0.5941
1451.16	1.0047	0.9437	0.6314	0.5943
1452.9	0.9887	0.944	0.6255	0.5945
1454.64	0.9639	0.9443	0.6255	0.5946
1456.38	1.0142	0.9445	0.6263	0.5948
1458.12	0.9612	0.9448	0.5947	0.595
1459.86	0.9827	0.9451	0.6328	0.5952
1461.6	1.016	0.9454	0.6379	0.5953
1463.34	0.9463	0.9457	0.5796	0.5955
1465.08	0.9387	0.9459	0.5855	0.5957
1466.82	0.9565	0.9462	0.5956	0.5959
1468.56	1.07	0.9465	0.6337	0.596

## Sheet: Panel b
Time of refolding (us)	Blue curve	Fit to blue curve	Time of refolding (us)	Red curve	Fit to red curve
-588.12	--	1.9386	-588.12	--	2.5623
-584.64	--	1.9292	-584.64	--	2.5453
-581.16	--	1.92	-581.16	--	2.5284
-577.68	--	1.9107	-577.68	--	2.5116
-574.2	--	1.9016	-574.2	--	2.495
-570.72	--	1.8925	-570.72	--	2.4785
-567.24	--	1.8835	-567.24	--	2.4621
-563.76	--	1.8745	-563.76	--	2.4459
-560.28	--	1.8656	-560.28	--	2.4298
-556.8	--	1.8568	-556.8	--	2.4139
-553.32	--	1.848	-553.32	--	2.3981
-549.84	--	1.8393	-549.84	--	2.3824
-546.36	--	1.8306	-546.36	--	2.3669
-542.88	--	1.822	-542.88	--	2.3515
-539.4	--	1.8135	-539.4	--	2.3362
-535.92	--	1.805	-535.92	--	2.321
-532.44	--	1.7966	-532.44	--	2.306
-528.96	--	1.7882	-528.96	--	2.2911
-525.48	--	1.7799	-525.48	--	2.2763
-522	--	1.7716	-522	--	2.2617
-518.52	--	1.7634	-518.52	--	2.2472
-515.04	--	1.7553	-515.04	--	2.2328
-511.56	--	1.7472	-511.56	--	2.2185
-508.08	--	1.7391	-508.08	--	2.2043
-504.6	--	1.7311	-504.6	--	2.1903
-501.12	--	1.7232	-501.12	--	2.1763
-497.64	--	1.7153	-497.64	--	2.1625
-494.16	--	1.7075	-494.16	--	2.1488
-490.68	--	1.6998	-490.68	--	2.1352
-487.2	--	1.692	-487.2	--	2.1218
-483.72	--	1.6844	-483.72	--	2.1084
-480.24	--	1.6768	-480.24	--	2.0952
-476.76	--	1.6692	-476.76	--	2.082
-473.28	--	1.6617	-473.28	--	2.069
-469.8	--	1.6542	-469.8	--	2.0561
-466.32	--	1.6468	-466.32	--	2.0433
-462.84	--	1.6394	-462.84	--	2.0306
-459.36	--	1.6321	-459.36	--	2.018
-455.88	--	1.6249	-455.88	--	2.0055
-452.4	--	1.6177	-452.4	--	1.9931
-448.92	--	1.6105	-448.92	--	1.9808
-445.44	--	1.6034	-445.44	--	1.9687
-441.96	--	1.5963	-441.96	--	1.9566
-438.48	--	1.5893	-438.48	--	1.9446
-435	--	1.5823	-435	--	1.9327
-431.52	--	1.5754	-431.52	--	1.921
-428.04	--	1.5685	-428.04	--	1.9093
-424.56	--	1.5617	-424.56	--	1.8977
-421.08	--	1.5549	-421.08	--	1.8862
-417.6	--	1.5482	-417.6	--	1.8748
-414.12	--	1.5415	-414.12	--	1.8635
-410.64	--	1.5348	-410.64	--	1.8523
-407.16	--	1.5282	-407.16	--	1.8412
-403.68	--	1.5217	-403.68	--	1.8302
-400.2	--	1.5151	-400.2	--	1.8193
-396.72	--	1.5087	-396.72	--	1.8085
-393.24	--	1.5022	-393.24	--	1.7977
-389.76	--	1.4959	-389.76	--	1.7871
-386.28	--	1.4895	-386.28	--	1.7765
-382.8	--	1.4832	-382.8	--	1.766
-379.32	--	1.4769	-379.32	--	1.7556
-375.84	--	1.4707	-375.84	--	1.7453
-372.36	--	1.4646	-372.36	--	1.7351
-368.88	--	1.4584	-368.88	--	1.725
-365.4	--	1.4523	-365.4	--	1.715
-361.92	--	1.4463	-361.92	--	1.705
-358.44	--	1.4403	-358.44	--	1.6951
-354.96	--	1.4343	-354.96	--	1.6853
-351.48	--	1.4284	-351.48	--	1.6756
-348	--	1.4225	-348	--	1.666
-344.52	--	1.4166	-344.52	--	1.6564
-341.04	--	1.4108	-341.04	--	1.6469
-337.56	--	1.4051	-337.56	--	1.6375
-334.08	--	1.3993	-334.08	--	1.6282
-330.6	--	1.3936	-330.6	--	1.619
-327.12	--	1.388	-327.12	--	1.6098
-323.64	--	1.3824	-323.64	--	1.6007
-320.16	--	1.3768	-320.16	--	1.5917
-316.68	--	1.3712	-316.68	--	1.5828
-313.2	--	1.3657	-313.2	--	1.5739
-309.72	--	1.3603	-309.72	--	1.5651
-306.24	--	1.3548	-306.24	--	1.5564
-302.76	--	1.3494	-302.76	--	1.5477
-299.28	--	1.3441	-299.28	--	1.5392
-295.8	--	1.3387	-295.8	--	1.5307
-292.32	--	1.3335	-292.32	--	1.5222
-288.84	--	1.3282	-288.84	--	1.5139
-285.36	--	1.323	-285.36	--	1.5056
-281.88	--	1.3178	-281.88	--	1.4973
-278.4	--	1.3127	-278.4	--	1.4892
-274.92	--	1.3075	-274.92	--	1.4811
-271.44	--	1.3025	-271.44	--	1.4731
-267.96	--	1.2974	-267.96	--	1.4651
-264.48	--	1.2924	-264.48	--	1.4572
-261	--	1.2874	-261	--	1.4494
-257.52	--	1.2825	-257.52	--	1.4416
-254.04	--	1.2776	-254.04	--	1.4339
-250.56	--	1.2727	-250.56	--	1.4263
-247.08	--	1.2679	-247.08	--	1.4187
-243.6	--	1.263	-243.6	--	1.4112
-240.12	--	1.2583	-240.12	--	1.4038
-236.64	--	1.2535	-236.64	--	1.3964
-233.16	--	1.2488	-233.16	--	1.3891
-229.68	--	1.2441	-229.68	--	1.3818
-226.2	--	1.2394	-226.2	--	1.3746
-222.72	--	1.2348	-222.72	--	1.3674
-219.24	--	1.2302	-219.24	--	1.3603
-215.76	--	1.2257	-215.76	--	1.3533
-212.28	--	1.2211	-212.28	--	1.3463
-208.8	--	1.2166	-208.8	--	1.3394
-205.32	--	1.2122	-205.32	--	1.3326
-201.84	--	1.2077	-201.84	--	1.3258
-198.36	--	1.2033	-198.36	--	1.319
-194.88	--	1.1989	-194.88	--	1.3123
-191.4	--	1.1946	-191.4	--	1.3057
-187.92	--	1.1902	-187.92	--	1.2991
-184.44	--	1.186	-184.44	--	1.2926
-180.96	--	1.1817	-180.96	--	1.2861
-177.48	--	1.1774	-177.48	--	1.2797
-174	--	1.1732	-174	--	1.2733
-170.52	--	1.169	-170.52	--	1.267
-167.04	--	1.1649	-167.04	--	1.2608
-163.56	--	1.1608	-163.56	--	1.2546
-160.08	--	1.1567	-160.08	--	1.2484
-156.6	--	1.1526	-156.6	--	1.2423
-153.12	--	1.1485	-153.12	--	1.2362
-149.64	--	1.1445	-149.64	--	1.2302
-146.16	--	1.1405	-146.16	--	1.2243
-142.68	--	1.1366	-142.68	--	1.2183
-139.2	--	1.1326	-139.2	--	1.2125
-135.72	--	1.1287	-135.72	--	1.2067
-132.24	--	1.1248	-132.24	--	1.2009
-128.76	--	1.121	-128.76	--	1.1952
-125.28	--	1.1171	-125.28	--	1.1895
-121.8	--	1.1133	-121.8	--	1.1839
-118.32	--	1.1095	-118.32	--	1.1783
-114.84	--	1.1058	-114.84	--	1.1727
-111.36	--	1.102	-111.36	--	1.1672
-107.88	--	1.0983	-107.88	--	1.1618
-104.4	--	1.0947	-104.4	--	1.1564
-100.92	--	1.091	-100.92	--	1.151
-97.44	--	1.0874	-97.44	--	1.1457
-93.96	--	1.0837	-93.96	--	1.1404
-90.48	--	1.0802	-90.48	--	1.1352
-87	--	1.0766	-87	--	1.13
-83.52	--	1.073	-83.52	--	1.1249
-80.04	--	1.0695	-80.04	--	1.1198
-76.56	--	1.066	-76.56	--	1.1147
-73.08	--	1.0626	-73.08	--	1.1097
-69.6	--	1.0591	-69.6	--	1.1047
-66.12	--	1.0557	-66.12	--	1.0998
-62.64	--	1.0523	-62.64	--	1.0949
-59.16	--	1.0489	-59.16	--	1.09
-55.68	--	1.0455	-55.68	--	1.0852
-52.2	--	1.0422	-52.2	--	1.0804
-48.72	--	1.0389	-48.72	--	1.0757
-45.24	--	1.0356	-45.24	--	1.071
-41.76	--	1.0323	-41.76	--	1.0663
-38.28	--	1.0291	-38.28	--	1.0617
-34.8	--	1.0259	-34.8	--	1.0571
-31.32	--	1.0226	-31.32	--	1.0525
-27.84	--	1.0195	-27.84	--	1.048
-24.36	--	1.0163	-24.36	--	1.0435
-20.88	--	1.0132	-20.88	--	1.0391
-17.4	--	1.01	-17.4	--	1.0347
-13.92	--	1.0069	-13.92	--	1.0303
-10.44	--	1.0038	-10.44	--	1.026
-6.96	--	1.0008	-6.96	--	1.0217
-3.48	--	0.9977	-3.48	--	1.0174
0	--	0.9947	0	--	1.0132
3.48	--	0.9917	3.48	--	1.009
6.96	--	0.9887	6.96	--	1.0048
10.44	--	0.9858	10.44	--	1.0007
13.92	--	0.9828	13.92	--	0.9966
17.4	--	0.9799	17.4	--	0.9925
20.88	--	0.977	20.88	--	0.9885
24.36	--	0.9741	24.36	--	0.9845
27.84	--	0.9713	27.84	--	0.9805
31.32	--	0.9684	31.32	--	0.9765
34.8	--	0.9656	34.8	--	0.9726
38.28	--	0.9628	38.28	--	0.9688
41.76	--	0.96	41.76	--	0.9649
45.24	--	0.9572	45.24	--	0.9611
48.72	--	0.9544	48.72	--	0.9573
52.2	--	0.9517	52.2	--	0.9536
55.68	--	0.949	55.68	--	0.9499
59.16	--	0.9463	59.16	--	0.9462
62.64	--	0.9436	62.64	--	0.9425
66.12	--	0.9409	66.12	0.9292	0.9389
69.6	--	0.9383	69.6	0.9326	0.9353
73.08	--	0.9357	73.08	0.9354	0.9317
76.56	--	0.933	76.56	0.9473	0.9281
80.04	0.9804	0.9304	80.04	0.9634	0.9246
83.52	0.9415	0.9279	83.52	0.9299	0.9211
87	0.9126	0.9253	87	0.9085	0.9177
90.48	0.9042	0.9228	90.48	0.9051	0.9142
93.96	0.9552	0.9202	93.96	0.9396	0.9108
97.44	0.9315	0.9177	97.44	0.9127	0.9074
100.92	0.9339	0.9152	100.92	0.8969	0.9041
104.4	0.9507	0.9127	104.4	0.9278	0.9007
107.88	0.9171	0.9103	107.88	0.8948	0.8974
111.36	0.9206	0.9078	111.36	0.8808	0.8942
114.84	0.9477	0.9054	114.84	0.9028	0.8909
118.32	0.9244	0.903	118.32	0.8839	0.8877
121.8	0.8862	0.9006	121.8	0.8968	0.8845
125.28	0.908	0.8982	125.28	0.8649	0.8813
128.76	0.887	0.8958	128.76	0.8574	0.8782
132.24	0.8718	0.8935	132.24	0.8677	0.8751
135.72	0.8876	0.8911	135.72	0.8643	0.872
139.2	0.8757	0.8888	139.2	0.8726	0.8689
142.68	0.9032	0.8865	142.68	0.8875	0.8658
146.16	0.8859	0.8842	146.16	0.8444	0.8628
149.64	0.8682	0.8819	149.64	0.8576	0.8598
153.12	0.8693	0.8797	153.12	0.8652	0.8568
156.6	0.8685	0.8774	156.6	0.8437	0.8539
160.08	0.8858	0.8752	160.08	0.8455	0.8509
163.56	0.8641	0.8729	163.56	0.8349	0.848
167.04	0.8689	0.8707	167.04	0.8566	0.8451
170.52	0.8718	0.8686	170.52	0.8253	0.8423
174	0.8723	0.8664	174	0.8308	0.8394
177.48	0.8506	0.8642	177.48	0.8161	0.8366
180.96	0.8532	0.8621	180.96	0.8283	0.8338
184.44	0.8657	0.8599	184.44	0.8328	0.8311
187.92	0.8631	0.8578	187.92	0.8151	0.8283
191.4	0.8701	0.8557	191.4	0.8135	0.8256
194.88	0.8531	0.8536	194.88	0.8239	0.8229
198.36	0.8249	0.8515	198.36	0.805	0.8202
201.84	0.8565	0.8495	201.84	0.8409	0.8175
205.32	0.8569	0.8474	205.32	0.8378	0.8149
208.8	0.8497	0.8454	208.8	0.8062	0.8122
212.28	0.8306	0.8433	212.28	0.7983	0.8096
215.76	0.8345	0.8413	215.76	0.7833	0.807
219.24	0.8472	0.8393	219.24	0.7895	0.8045
222.72	0.8303	0.8373	222.72	0.8012	0.8019
226.2	0.8393	0.8354	226.2	0.7928	0.7994
229.68	0.8336	0.8334	229.68	0.8136	0.7969
233.16	0.8133	0.8314	233.16	0.7852	0.7944
236.64	0.8371	0.8295	236.64	0.7957	0.7919
240.12	0.8365	0.8276	240.12	0.8114	0.7895
243.6	0.8272	0.8257	243.6	0.7902	0.7871
247.08	0.8089	0.8238	247.08	0.7908	0.7847
250.56	0.8233	0.8219	250.56	0.7797	0.7823
254.04	0.8203	0.82	254.04	0.7776	0.7799
257.52	0.8303	0.8181	257.52	0.782	0.7775
261	0.8222	0.8163	261	0.7529	0.7752
264.48	0.8096	0.8144	264.48	0.7689	0.7729
267.96	0.8179	0.8126	267.96	0.7614	0.7706
271.44	0.8142	0.8108	271.44	0.7616	0.7683
274.92	0.8189	0.809	274.92	0.7694	0.766
278.4	0.8179	0.8072	278.4	0.7699	0.7638
281.88	0.831	0.8054	281.88	0.7738	0.7616
285.36	0.8039	0.8036	285.36	0.7619	0.7593
288.84	0.807	0.8019	288.84	0.7707	0.7572
292.32	0.7909	0.8001	292.32	0.7493	0.755
295.8	0.7635	0.7984	295.8	0.7722	0.7528
299.28	0.7444	0.7967	299.28	0.7524	0.7507
302.76	0.7955	0.795	302.76	0.7638	0.7485
306.24	0.7866	0.7933	306.24	0.725	0.7464
309.72	0.7736	0.7916	309.72	0.7491	0.7443
313.2	0.7676	0.7899	313.2	0.7569	0.7422
316.68	0.7827	0.7882	316.68	0.753	0.7402
320.16	0.7659	0.7865	320.16	0.7261	0.7381
323.64	0.7745	0.7849	323.64	0.7184	0.7361
327.12	0.7762	0.7833	327.12	0.7504	0.7341
330.6	0.7638	0.7816	330.6	0.741	0.7321
334.08	0.7844	0.78	334.08	0.7177	0.7301
337.56	0.7876	0.7784	337.56	0.7333	0.7281
341.04	0.7853	0.7768	341.04	0.7348	0.7262
344.52	0.7794	0.7752	344.52	0.7365	0.7242
348	0.7786	0.7736	348	0.7369	0.7223
351.48	0.7833	0.7721	351.48	0.7273	0.7204
354.96	0.764	0.7705	354.96	0.7204	0.7185
358.44	0.7681	0.769	358.44	0.7222	0.7166
361.92	0.7637	0.7674	361.92	0.6944	0.7147
365.4	0.7572	0.7659	365.4	0.6962	0.7129
368.88	0.7464	0.7644	368.88	0.7087	0.711
372.36	0.7616	0.7629	372.36	0.7174	0.7092
375.84	0.7478	0.7614	375.84	0.7026	0.7074
379.32	0.7633	0.7599	379.32	0.6957	0.7056
382.8	0.7518	0.7584	382.8	0.7048	0.7038
386.28	0.7365	0.7569	386.28	0.6962	0.702
389.76	0.7316	0.7555	389.76	0.6872	0.7003
393.24	0.7599	0.754	393.24	0.6754	0.6985
396.72	0.746	0.7526	396.72	0.6874	0.6968
400.2	0.7321	0.7511	400.2	0.679	0.6951
403.68	0.7464	0.7497	403.68	0.6982	0.6934
407.16	0.7466	0.7483	407.16	0.6961	0.6917
410.64	0.7492	0.7469	410.64	0.6952	0.69
414.12	0.7428	0.7455	414.12	0.6711	0.6883
417.6	0.7235	0.7441	417.6	0.6679	0.6866
421.08	0.7358	0.7427	421.08	0.6788	0.685
424.56	0.7385	0.7413	424.56	0.6838	0.6834
428.04	0.7364	0.74	428.04	0.6661	0.6818
431.52	0.7403	0.7386	431.52	0.6699	0.6801
435	0.75	0.7373	435	0.6794	0.6785
438.48	0.7342	0.7359	438.48	0.6617	0.677
441.96	0.7488	0.7346	441.96	0.6664	0.6754
445.44	0.7461	0.7333	445.44	0.6871	0.6738
448.92	0.7365	0.732	448.92	0.6639	0.6723
452.4	0.7443	0.7307	452.4	0.6595	0.6707
455.88	0.749	0.7294	455.88	0.6739	0.6692
459.36	0.7431	0.7281	459.36	0.6867	0.6677
462.84	0.7433	0.7268	462.84	0.6735	0.6662
466.32	0.7171	0.7255	466.32	0.6745	0.6647
469.8	0.7192	0.7243	469.8	0.6618	0.6632
473.28	0.7066	0.723	473.28	0.6711	0.6617
476.76	0.704	0.7218	476.76	0.6625	0.6603
480.24	0.7126	0.7205	480.24	0.6587	0.6588
483.72	0.7005	0.7193	483.72	0.6515	0.6574
487.2	0.7153	0.7181	487.2	0.6498	0.656
490.68	0.7104	0.7168	490.68	0.6496	0.6546
494.16	0.7071	0.7156	494.16	0.6501	0.6531
497.64	0.69	0.7144	497.64	0.6252	0.6517
501.12	0.699	0.7132	501.12	0.6623	0.6504
504.6	0.7015	0.7121	504.6	0.6551	0.649
508.08	0.7106	0.7109	508.08	0.6513	0.6476
511.56	0.7047	0.7097	511.56	0.6479	0.6463
515.04	0.7028	0.7085	515.04	0.6349	0.6449
518.52	0.7114	0.7074	518.52	0.6405	0.6436
522	0.7014	0.7062	522	0.6323	0.6422
525.48	0.7026	0.7051	525.48	0.6382	0.6409
528.96	0.7236	0.7039	528.96	0.6443	0.6396
532.44	0.7156	0.7028	532.44	0.6418	0.6383
535.92	0.7226	0.7017	535.92	0.648	0.637
539.4	0.6997	0.7006	539.4	0.6396	0.6358
542.88	0.7227	0.6995	542.88	0.6371	0.6345
546.36	0.6999	0.6984	546.36	0.6543	0.6332
549.84	0.704	0.6973	549.84	0.6488	0.632
553.32	0.6963	0.6962	553.32	0.6404	0.6307
556.8	0.685	0.6951	556.8	0.627	0.6295
560.28	0.7055	0.694	560.28	0.6396	0.6283
563.76	0.708	0.693	563.76	0.632	0.627
567.24	0.6898	0.6919	567.24	0.6367	0.6258
570.72	0.6865	0.6908	570.72	0.6412	0.6246
574.2	0.6765	0.6898	574.2	0.6286	0.6234
577.68	0.6774	0.6887	577.68	0.6273	0.6223
581.16	0.6788	0.6877	581.16	0.6226	0.6211
584.64	0.6741	0.6867	584.64	0.6268	0.6199
588.12	0.6782	0.6857	588.12	0.6211	0.6188
591.6	0.6914	0.6846	591.6	0.6168	0.6176
595.08	0.6793	0.6836	595.08	0.6235	0.6165
598.56	0.6785	0.6826	598.56	0.6164	0.6153
602.04	0.679	0.6816	602.04	0.6123	0.6142
605.52	0.6866	0.6806	605.52	0.6126	0.6131
609	0.6844	0.6796	609	0.6115	0.612
612.48	0.6803	0.6787	612.48	0.6034	0.6109
615.96	0.6853	0.6777	615.96	0.6127	0.6098
619.44	0.6707	0.6767	619.44	0.6008	0.6087
622.92	0.6843	0.6758	622.92	0.6191	0.6076
626.4	0.6739	0.6748	626.4	0.6036	0.6066
629.88	0.6763	0.6739	629.88	0.6121	0.6055
633.36	0.6686	0.6729	633.36	0.6146	0.6044
636.84	0.6665	0.672	636.84	0.5969	0.6034
640.32	0.6653	0.671	640.32	0.6058	0.6023
643.8	0.666	0.6701	643.8	0.6066	0.6013
647.28	0.6715	0.6692	647.28	0.61	0.6003
650.76	0.662	0.6683	650.76	0.6041	0.5993
654.24	0.6745	0.6674	654.24	0.6033	0.5983
657.72	0.6568	0.6665	657.72	0.601	0.5973
661.2	0.6677	0.6656	661.2	0.6015	0.5963
664.68	0.667	0.6647	664.68	0.6055	0.5953
668.16	0.6733	0.6638	668.16	0.5979	0.5943
671.64	0.658	0.6629	671.64	0.5935	0.5933
675.12	0.6603	0.662	675.12	0.5874	0.5923
678.6	0.6573	0.6611	678.6	0.5792	0.5914
682.08	0.6595	0.6603	682.08	0.584	0.5904
685.56	0.6527	0.6594	685.56	0.5903	0.5895
689.04	0.649	0.6585	689.04	0.5892	0.5885
692.52	0.6494	0.6577	692.52	0.5861	0.5876
696	0.6489	0.6568	696	0.5746	0.5866
699.48	0.6528	0.656	699.48	0.588	0.5857
702.96	0.6496	0.6552	702.96	0.579	0.5848
706.44	0.6512	0.6543	706.44	0.5853	0.5839
709.92	0.6534	0.6535	709.92	0.5846	0.583
713.4	0.6591	0.6527	713.4	0.5915	0.5821
716.88	0.6638	0.6519	716.88	0.5761	0.5812
720.36	0.6611	0.6511	720.36	0.58	0.5803
723.84	0.6625	0.6503	723.84	0.588	0.5794
727.32	0.6537	0.6495	727.32	0.5786	0.5785
730.8	0.6589	0.6487	730.8	0.5793	0.5777
734.28	0.6492	0.6479	734.28	0.5785	0.5768
737.76	0.65	0.6471	737.76	0.5781	0.5759
741.24	0.6449	0.6463	741.24	0.5719	0.5751
744.72	0.6389	0.6455	744.72	0.5605	0.5742
748.2	0.6543	0.6447	748.2	0.5741	0.5734
751.68	0.6269	0.644	751.68	0.568	0.5726
755.16	0.6325	0.6432	755.16	0.5692	0.5717
758.64	0.6467	0.6424	758.64	0.5786	0.5709
762.12	0.6369	0.6417	762.12	0.5748	0.5701
765.6	0.6214	0.6409	765.6	0.5678	0.5693
769.08	0.6342	0.6402	769.08	0.5662	0.5685
772.56	0.6356	0.6394	772.56	0.5623	0.5677
776.04	0.6375	0.6387	776.04	0.5706	0.5669
779.52	0.6315	0.638	779.52	0.5669	0.5661
783	0.6343	0.6372	783	0.5791	0.5653
786.48	0.6353	0.6365	786.48	0.5705	0.5645
789.96	0.646	0.6358	789.96	0.5748	0.5637
793.44	0.6404	0.6351	793.44	0.5757	0.563
796.92	0.6327	0.6344	796.92	0.5651	0.5622
800.4	0.6312	0.6337	800.4	0.5548	0.5614
803.88	0.6418	0.633	803.88	0.5562	0.5607
807.36	0.6326	0.6323	807.36	0.5607	0.5599
810.84	0.6083	0.6316	810.84	0.5507	0.5592
814.32	0.6236	0.6309	814.32	0.5546	0.5584
817.8	0.6281	0.6302	817.8	0.5587	0.5577
821.28	0.6365	0.6295	821.28	0.5531	0.557
824.76	0.6343	0.6288	824.76	0.5536	0.5562
828.24	0.6343	0.6282	828.24	0.5506	0.5555
831.72	0.6308	0.6275	831.72	0.5546	0.5548
835.2	0.6357	0.6268	835.2	0.5593	0.5541
838.68	0.6324	0.6262	838.68	0.5492	0.5534
842.16	0.6275	0.6255	842.16	0.5571	0.5527
845.64	0.6286	0.6248	845.64	0.5561	0.552
849.12	0.6312	0.6242	849.12	0.5458	0.5513
852.6	0.6202	0.6235	852.6	0.5541	0.5506
856.08	0.6236	0.6229	856.08	0.5548	0.5499
859.56	0.6267	0.6223	859.56	0.5519	0.5492
863.04	0.6281	0.6216	863.04	0.5502	0.5486
866.52	0.6223	0.621	866.52	0.5434	0.5479
870	0.6222	0.6204	870	0.5441	0.5472
873.48	0.6146	0.6197	873.48	0.5454	0.5465
876.96	0.6113	0.6191	876.96	0.5468	0.5459
880.44	0.6085	0.6185	880.44	0.5432	0.5452
883.92	0.5967	0.6179	883.92	0.5398	0.5446
887.4	0.6052	0.6173	887.4	0.5373	0.5439
890.88	0.6092	0.6167	890.88	0.5516	0.5433
894.36	0.5924	0.6161	894.36	0.5453	0.5426
897.84	0.6065	0.6155	897.84	0.5542	0.542
901.32	0.6171	0.6149	901.32	0.5456	0.5414
904.8	0.6194	0.6143	904.8	0.545	0.5408
908.28	0.6196	0.6137	908.28	0.5496	0.5401
911.76	0.6148	0.6131	911.76	0.5418	0.5395
915.24	0.6281	0.6125	915.24	0.5422	0.5389
918.72	0.6258	0.6119	918.72	0.5373	0.5383
922.2	0.6235	0.6113	922.2	0.5404	0.5377
925.68	0.6144	0.6108	925.68	0.5403	0.5371
929.16	0.6302	0.6102	929.16	0.5375	0.5365
932.64	0.6236	0.6096	932.64	0.5383	0.5359
936.12	0.6199	0.6091	936.12	0.5457	0.5353
939.6	0.6116	0.6085	939.6	0.5332	0.5347
943.08	0.6171	0.608	943.08	0.5299	0.5341
946.56	0.6061	0.6074	946.56	0.5274	0.5335
950.04	0.6019	0.6069	950.04	0.5296	0.5329
953.52	0.61	0.6063	953.52	0.5359	0.5324
957	0.6124	0.6058	957	0.5291	0.5318
960.48	0.6048	0.6052	960.48	0.5302	0.5312
963.96	0.608	0.6047	963.96	0.5301	0.5307
967.44	0.6111	0.6041	967.44	0.5268	0.5301
970.92	0.6032	0.6036	970.92	0.5335	0.5295
974.4	0.6082	0.6031	974.4	0.5325	0.529
977.88	0.6054	0.6026	977.88	0.5313	0.5284
981.36	0.6021	0.602	981.36	0.5307	0.5279
984.84	0.5875	0.6015	984.84	0.5153	0.5273
988.32	0.6008	0.601	988.32	0.5211	0.5268
991.8	0.5995	0.6005	991.8	0.53	0.5263
995.28	0.6052	0.6	995.28	0.519	0.5257
998.76	0.6051	0.5995	998.76	0.5279	0.5252
1002.24	0.5982	0.599	1002.24	0.5223	0.5247
1005.72	0.6017	0.5985	1005.72	0.5264	0.5241
1009.2	0.5954	0.598	1009.2	0.5258	0.5236
1012.68	0.602	0.5975	1012.68	0.5248	0.5231
1016.16	0.5927	0.597	1016.16	0.52	0.5226
1019.64	0.598	0.5965	1019.64	0.5201	0.5221
1023.12	0.5955	0.596	1023.12	0.5213	0.5216
1026.6	0.5931	0.5955	1026.6	0.5264	0.5211
1030.08	0.5948	0.595	1030.08	0.527	0.5205
1033.56	0.5866	0.5945	1033.56	0.5205	0.52
1037.04	0.5986	0.5941	1037.04	0.5234	0.5195
1040.52	0.5988	0.5936	1040.52	0.5181	0.5191
1044	0.5946	0.5931	1044	0.5224	0.5186
1047.48	0.5986	0.5926	1047.48	0.5179	0.5181
1050.96	0.6018	0.5922	1050.96	0.5164	0.5176
1054.44	0.5944	0.5917	1054.44	0.5183	0.5171
1057.92	0.6008	0.5912	1057.92	0.5123	0.5166
1061.4	0.5883	0.5908	1061.4	0.5218	0.5161
1064.88	0.5935	0.5903	1064.88	0.5142	0.5157
1068.36	0.6037	0.5899	1068.36	0.5173	0.5152
1071.84	0.592	0.5894	1071.84	0.51	0.5147
1075.32	0.5922	0.589	1075.32	0.5197	0.5143
1078.8	0.5918	0.5885	1078.8	0.5127	0.5138
1082.28	0.587	0.5881	1082.28	0.5117	0.5133
1085.76	0.5883	0.5876	1085.76	0.5103	0.5129
1089.24	0.5797	0.5872	1089.24	0.5138	0.5124
1092.72	0.593	0.5868	1092.72	0.5156	0.512
1096.2	0.5757	0.5863	1096.2	0.5116	0.5115
1099.68	0.5775	0.5859	1099.68	0.5112	0.5111
1103.16	0.5811	0.5855	1103.16	0.5157	0.5106
1106.64	0.5763	0.585	1106.64	0.5115	0.5102
1110.12	0.5771	0.5846	1110.12	0.5114	0.5097
1113.6	0.5755	0.5842	1113.6	0.5106	0.5093
1117.08	0.5752	0.5838	1117.08	0.5092	0.5088
1120.56	0.5809	0.5833	1120.56	0.5043	0.5084
1124.04	0.5817	0.5829	1124.04	0.5046	0.508
1127.52	0.5774	0.5825	1127.52	0.5056	0.5076
1131	0.5784	0.5821	1131	0.5126	0.5071
1134.48	0.5702	0.5817	1134.48	0.5038	0.5067
1137.96	0.5787	0.5813	1137.96	0.5097	0.5063
1141.44	0.5776	0.5809	1141.44	0.5035	0.5059
1144.92	0.5841	0.5805	1144.92	0.5062	0.5054
1148.4	0.5791	0.5801	1148.4	0.5032	0.505
1151.88	0.5848	0.5797	1151.88	0.5065	0.5046
1155.36	0.5773	0.5793	1155.36	0.5047	0.5042
1158.84	0.5786	0.5789	1158.84	0.5029	0.5038
1162.32	0.5758	0.5785	1162.32	0.4977	0.5034
1165.8	0.5819	0.5781	1165.8	0.4972	0.503
1169.28	0.5748	0.5777	1169.28	0.5075	0.5026
1172.76	0.5771	0.5773	1172.76	0.4999	0.5022
1176.24	0.5792	0.5769	1176.24	0.4958	0.5018
1179.72	0.5785	0.5766	1179.72	0.4941	0.5014
1183.2	0.566	0.5762	1183.2	0.5026	0.501
1186.68	0.5726	0.5758	1186.68	0.4974	0.5006
1190.16	0.5721	0.5754	1190.16	0.507	0.5002
1193.64	0.5775	0.5751	1193.64	0.4994	0.4998
1197.12	0.5728	0.5747	1197.12	0.5023	0.4994
1200.6	0.5717	0.5743	1200.6	0.4982	0.4991
1204.08	0.5703	0.5739	1204.08	0.493	0.4987
1207.56	0.5624	0.5736	1207.56	0.4961	0.4983
1211.04	0.5639	0.5732	1211.04	0.5024	0.4979
1214.52	0.5644	0.5729	1214.52	0.4843	0.4975
1218	0.5737	0.5725	1218	0.4951	0.4972
1221.48	0.5695	0.5721	1221.48	0.4914	0.4968
1224.96	0.5637	0.5718	1224.96	0.4958	0.4964
1228.44	0.5602	0.5714	1228.44	0.498	0.4961
1231.92	0.5598	0.5711	1231.92	0.4943	0.4957
1235.4	0.5612	0.5707	1235.4	0.494	0.4953
1238.88	0.5595	0.5704	1238.88	0.4929	0.495
1242.36	0.5619	0.57	1242.36	0.492	0.4946
1245.84	0.5684	0.5697	1245.84	0.4894	0.4943
1249.32	0.5616	0.5693	1249.32	0.4896	0.4939
1252.8	0.5673	0.569	1252.8	0.4926	0.4935
1256.28	0.5605	0.5687	1256.28	0.4932	0.4932
1259.76	0.5658	0.5683	1259.76	0.4916	0.4928
1263.24	0.5573	0.568	1263.24	0.4924	0.4925
1266.72	0.5604	0.5676	1266.72	0.4934	0.4921
1270.2	0.5593	0.5673	1270.2	0.492	0.4918
1273.68	0.5609	0.567	1273.68	0.4884	0.4915
1277.16	0.5639	0.5667	1277.16	0.484	0.4911
1280.64	0.5695	0.5663	1280.64	0.4883	0.4908
1284.12	0.5644	0.566	1284.12	0.4908	0.4904
1287.6	0.5729	0.5657	1287.6	0.4825	0.4901
1291.08	0.5678	0.5654	1291.08	0.4898	0.4898
1294.56	0.5734	0.565	1294.56	0.4899	0.4894
1298.04	0.5783	0.5647	1298.04	0.4856	0.4891
1301.52	0.5629	0.5644	1301.52	0.485	0.4888
1305	0.5776	0.5641	1305	0.4858	0.4884
1308.48	0.5792	0.5638	1308.48	0.4794	0.4881
1311.96	0.5767	0.5635	1311.96	0.4866	0.4878
1315.44	0.5607	0.5631	1315.44	0.4851	0.4875
1318.92	0.5709	0.5628	1318.92	0.4865	0.4871
1322.4	0.5609	0.5625	1322.4	0.4863	0.4868
1325.88	0.5608	0.5622	1325.88	0.4897	0.4865
1329.36	0.5642	0.5619	1329.36	0.4799	0.4862
1332.84	0.5652	0.5616	1332.84	0.4886	0.4859
1336.32	0.5538	0.5613	1336.32	0.4808	0.4856
1339.8	0.5607	0.561	1339.8	0.484	0.4852
1343.28	0.5726	0.5607	1343.28	0.4786	0.4849
1346.76	0.5556	0.5604	1346.76	0.488	0.4846
1350.24	0.5606	0.5601	1350.24	0.4882	0.4843
1353.72	0.5627	0.5598	1353.72	0.4839	0.484
1357.2	0.5583	0.5595	1357.2	0.4814	0.4837
1360.68	0.5567	0.5592	1360.68	0.4869	0.4834
1364.16	0.5556	0.559	1364.16	0.4833	0.4831
1367.64	0.5517	0.5587	1367.64	0.477	0.4828
1371.12	0.5516	0.5584	1371.12	0.4857	0.4825
1374.6	0.5517	0.5581	1374.6	0.4862	0.4822
1378.08	0.5518	0.5578	1378.08	0.482	0.4819
1381.56	0.5552	0.5575	1381.56	0.4756	0.4816
1385.04	0.5616	0.5572	1385.04	0.4787	0.4813
1388.52	0.5584	0.557	1388.52	0.4767	0.481
1392	0.5584	0.5567	1392	0.4797	0.4807
1395.48	0.5535	0.5564	1395.48	0.4765	0.4804
1398.96	0.545	0.5561	1398.96	0.4851	0.4801
1402.44	0.5521	0.5559	1402.44	0.479	0.4799
1405.92	0.5612	0.5556	1405.92	0.4798	0.4796
1409.4	0.5615	0.5553	1409.4	0.4777	0.4793
1412.88	0.566	0.555	1412.88	0.4746	0.479
1416.36	0.5642	0.5548	1416.36	0.4796	0.4787
1419.84	0.5558	0.5545	1419.84	0.475	0.4784
1423.32	0.5602	0.5542	1423.32	0.4778	0.4782
1426.8	0.5582	0.554	1426.8	0.4771	0.4779
1430.28	0.5557	0.5537	1430.28	0.4753	0.4776
1433.76	0.5447	0.5535	1433.76	0.4777	0.4773
1437.24	0.5596	0.5532	1437.24	0.4823	0.4771
1440.72	0.5565	0.5529	1440.72	0.4781	0.4768
1444.2	0.5585	0.5527	1444.2	0.4792	0.4765
1447.68	0.5555	0.5524	1447.68	0.4703	0.4762
1451.16	0.5563	0.5522	1451.16	0.4751	0.476
1454.64	0.5586	0.5519	1454.64	0.4776	0.4757
1458.12	0.5636	0.5517	1458.12	0.4799	0.4754
1461.6	0.5597	0.5514	1461.6	0.4742	0.4752
1465.08	0.5544	0.5512	1465.08	0.4688	0.4749
1468.56	0.5497	0.5509	1468.56	0.4719	0.4746
1472.04	0.5496	0.5507	1472.04	0.4719	0.4744
1475.52	0.5481	0.5504	1475.52	0.4726	0.4741
1479	0.5507	0.5502	1479	0.4695	0.4739
1482.48	0.5478	0.5499	1482.48	0.4696	0.4736
1485.96	0.5485	0.5497	1485.96	0.4656	0.4733
1489.44	0.5423	0.5494	1489.44	0.4697	0.4731
1492.92	0.5526	0.5492	1492.92	0.4685	0.4728
1496.4	0.5485	0.549	1496.4	0.4707	0.4726
1499.88	0.5487	0.5487	1499.88	0.4701	0.4723
1503.36	0.5446	0.5485	1503.36	0.4693	0.4721
1506.84	0.5451	0.5482	1506.84	0.4687	0.4718
1510.32	0.5486	0.548	1510.32	0.47	0.4716
1513.8	0.5448	0.5478	1513.8	0.4726	0.4713
1517.28	0.5423	0.5475	1517.28	0.4689	0.4711
1520.76	0.5443	0.5473	1520.76	0.4637	0.4708
1524.24	0.5433	0.5471	1524.24	0.472	0.4706
1527.72	0.549	0.5468	1527.72	0.4696	0.4703
1531.2	0.5445	0.5466	1531.2	0.4707	0.4701
1534.68	0.5425	0.5464	1534.68	0.4721	0.4698
1538.16	0.552	0.5462	1538.16	0.4716	0.4696
1541.64	0.5522	0.5459	1541.64	0.4668	0.4694
1545.12	0.5493	0.5457	1545.12	0.4678	0.4691
1548.6	0.5521	0.5455	1548.6	0.4677	0.4689
1552.08	0.5425	0.5453	1552.08	0.4688	0.4686
1555.56	0.5458	0.545	1555.56	0.471	0.4684
1559.04	0.5467	0.5448	1559.04	0.4675	0.4682
1562.52	0.5485	0.5446	1562.52	0.4686	0.4679
1566	0.549	0.5444	1566	0.4743	0.4677
1569.48	0.5479	0.5442	1569.48	0.4688	0.4675
1572.96	0.5521	0.5439	1572.96	0.4669	0.4672
1576.44	0.5511	0.5437	1576.44	0.4656	0.467
1579.92	0.5464	0.5435	1579.92	0.4673	0.4668
1583.4	0.5428	0.5433	1583.4	0.4675	0.4665
1586.88	0.5395	0.5431	1586.88	0.4662	0.4663
1590.36	0.5373	0.5429	1590.36	0.4674	0.4661
1593.84	0.5392	0.5427	1593.84	0.4721	0.4659
1597.32	0.5399	0.5425	1597.32	0.4682	0.4656
1600.8	0.5405	0.5423	1600.8	0.4652	0.4654
1604.28	0.5395	0.542	1604.28	0.467	0.4652
1607.76	0.5505	0.5418	1607.76	0.467	0.465
1611.24	0.5482	0.5416	1611.24	0.4632	0.4647
1614.72	0.5412	0.5414	1614.72	0.4694	0.4645
1618.2	0.5437	0.5412	1618.2	0.4675	0.4643
1621.68	0.5501	0.541	1621.68	0.4589	0.4641
1625.16	0.5503	0.5408	1625.16	0.4581	0.4639
1628.64	0.5417	0.5406	1628.64	0.4609	0.4636
1632.12	0.5478	0.5404	1632.12	0.4571	0.4634
1635.6	0.5479	0.5402	1635.6	0.4596	0.4632
1639.08	0.5429	0.54	1639.08	0.4627	0.463
1642.56	0.5457	0.5398	1642.56	0.457	0.4628
1646.04	0.5375	0.5396	1646.04	0.4606	0.4626
1649.52	0.5394	0.5394	1649.52	0.4645	0.4624
1653	0.5393	0.5392	1653	0.4617	0.4621
1656.48	0.5354	0.539	1656.48	0.467	0.4619
1659.96	0.5329	0.5389	1659.96	0.4584	0.4617
1663.44	0.5387	0.5387	1663.44	0.4567	0.4615
1666.92	0.5392	0.5385	1666.92	0.4604	0.4613
1670.4	0.5274	0.5383	1670.4	0.4622	0.4611
1673.88	0.5348	0.5381	1673.88	0.4591	0.4609
1677.36	0.5296	0.5379	1677.36	0.4582	0.4607
1680.84	0.5294	0.5377	1680.84	0.457	0.4605
1684.32	0.5351	0.5375	1684.32	0.4565	0.4603
1687.8	0.5327	0.5373	1687.8	0.459	0.4601
1691.28	0.5243	0.5372	1691.28	0.459	0.4599
1694.76	0.5287	0.537	1694.76	0.4635	0.4597
1698.24	0.5313	0.5368	1698.24	0.4645	0.4595
1701.72	0.5367	0.5366	1701.72	0.4557	0.4593
1705.2	0.5347	0.5364	1705.2	0.4571	0.4591
1708.68	0.544	0.5362	1708.68	0.4597	0.4589
1712.16	0.5355	0.5361	1712.16	0.4622	0.4587
1715.64	0.5362	0.5359	1715.64	0.4617	0.4585
1719.12	0.5388	0.5357	1719.12	0.4624	0.4583
1722.6	0.5469	0.5355	1722.6	0.4598	0.4581
1726.08	0.5413	0.5353	1726.08	0.4571	0.4579
1729.56	0.5398	0.5352	1729.56	0.4533	0.4577
1733.04	0.5363	0.535	1733.04	0.4604	0.4575
1736.52	0.5407	0.5348	1736.52	0.4592	0.4573
1740	0.5425	0.5346	1740	0.46	0.4571
1743.48	0.539	0.5345	1743.48	0.463	0.4569
1746.96	0.5328	0.5343	1746.96	0.4582	0.4567
1750.44	0.5394	0.5341	1750.44	0.4632	0.4565
1753.92	0.533	0.5339	1753.92	0.4653	0.4563
1757.4	0.5364	0.5338	1757.4	0.4607	0.4561
1760.88	0.5354	0.5336	1760.88	0.4621	0.4559
1764.36	0.5404	0.5334	1764.36	0.4575	0.4558
1767.84	0.5362	0.5333	1767.84	0.4496	0.4556
1771.32	0.5456	0.5331	1771.32	0.4548	0.4554
1774.8	0.5403	0.5329	1774.8	0.4559	0.4552
1778.28	0.5395	0.5328	1778.28	0.4591	0.455
1781.76	0.5463	0.5326	1781.76	0.453	0.4548
1785.24	0.5387	0.5324	1785.24	0.4528	0.4546
1788.72	0.5324	0.5323	1788.72	0.4557	0.4545
1792.2	0.5324	0.5321	1792.2	0.4597	0.4543
1795.68	0.5407	0.5319	1795.68	0.4536	0.4541
1799.16	0.5337	0.5318	1799.16	0.4524	0.4539
1802.64	0.5307	0.5316	1802.64	0.462	0.4537
1806.12	0.5369	0.5315	1806.12	0.4502	0.4535
1809.6	0.5345	0.5313	1809.6	0.4572	0.4534
1813.08	0.5316	0.5311	1813.08	0.4534	0.4532
1816.56	0.5392	0.531	1816.56	0.4575	0.453
1820.04	0.5286	0.5308	1820.04	0.4529	0.4528
1823.52	0.5342	0.5307	1823.52	0.4522	0.4527
1827	0.5319	0.5305	1827	0.4488	0.4525
1830.48	0.5368	0.5304	1830.48	0.4532	0.4523
1833.96	0.5302	0.5302	1833.96	0.4483	0.4521
1837.44	0.5242	0.53	1837.44	0.4475	0.452
1840.92	0.5341	0.5299	1840.92	0.4522	0.4518
1844.4	0.5263	0.5297	1844.4	0.4522	0.4516
1847.88	0.5257	0.5296	1847.88	0.452	0.4514
1851.36	0.5324	0.5294	1851.36	0.4461	0.4513
1854.84	0.527	0.5293	1854.84	0.4445	0.4511
1858.32	0.5277	0.5291	1858.32	0.4439	0.4509
1861.8	0.5208	0.529	1861.8	0.4445	0.4507
1865.28	0.526	0.5288	1865.28	0.4477	0.4506
1868.76	0.5264	0.5287	1868.76	0.4423	0.4504
1872.24	0.5197	0.5285	1872.24	0.4445	0.4502
1875.72	0.5185	0.5284	1875.72	0.4473	0.4501
1879.2	0.5274	0.5282	1879.2	0.4498	0.4499
1882.68	0.5319	0.5281	1882.68	0.446	0.4497
1886.16	0.5199	0.5279	1886.16	0.4481	0.4496
1889.64	0.5283	0.5278	1889.64	0.4468	0.4494
1893.12	0.5303	0.5277	1893.12	0.4537	0.4492
1896.6	0.5276	0.5275	1896.6	0.4567	0.4491
1900.08	0.526	0.5274	1900.08	0.4482	0.4489
1903.56	0.529	0.5272	1903.56	0.4483	0.4487
1907.04	0.5315	0.5271	1907.04	0.4513	0.4486
1910.52	0.5274	0.5269	1910.52	0.4511	0.4484
1914	0.5267	0.5268	1914	0.4476	0.4482
1917.48	0.5205	0.5267	1917.48	0.4517	0.4481
1920.96	0.5265	0.5265	1920.96	0.4443	0.4479
1924.44	0.5276	0.5264	1924.44	0.449	0.4477
1927.92	0.5278	0.5262	1927.92	0.4543	0.4476
1931.4	0.5322	0.5261	1931.4	0.4511	0.4474
1934.88	0.528	0.526	1934.88	0.4505	0.4473
1938.36	0.5232	0.5258	1938.36	0.4449	0.4471
1941.84	0.529	0.5257	1941.84	0.4411	0.4469
1945.32	0.5252	0.5255	1945.32	0.4459	0.4468
1948.8	0.5323	0.5254	1948.8	0.4489	0.4466
1952.28	0.529	0.5253	1952.28	0.447	0.4465
1955.76	0.5354	0.5251	1955.76	0.4455	0.4463
1959.24	0.5348	0.525	1959.24	0.4466	0.4462
1962.72	0.5352	0.5249	1962.72	0.4423	0.446
1966.2	0.5326	0.5247	1966.2	0.4444	0.4458
1969.68	0.5315	0.5246	1969.68	0.4479	0.4457
1973.16	0.5349	0.5245	1973.16	0.4443	0.4455
1976.64	0.53	0.5243	1976.64	0.4455	0.4454
1980.12	0.5302	0.5242	1980.12	0.4482	0.4452
1983.6	0.5268	0.5241	1983.6	0.4404	0.4451
1987.08	0.5303	0.5239	1987.08	0.4418	0.4449
1990.56	0.5347	0.5238	1990.56	0.4478	0.4448
1994.04	0.5281	0.5237	1994.04	0.4481	0.4446
1997.52	0.5239	0.5236	1997.52	0.445	0.4445
2001	0.5246	0.5234	2001	0.4433	0.4443
2004.48	0.5251	0.5233	2004.48	0.4512	0.4442
2007.96	0.5265	0.5232	2007.96	0.4404	0.444
2011.44	0.5286	0.5231	2011.44	0.4437	0.4439
2014.92	0.5287	0.5229	2014.92	0.4486	0.4437
2018.4	0.5349	0.5228	2018.4	0.4422	0.4436
2021.88	0.5315	0.5227	2021.88	0.4435	0.4434
2025.36	0.5303	0.5225	2025.36	0.4451	0.4433
2028.84	0.53	0.5224	2028.84	0.4452	0.4431
2032.32	0.5277	0.5223	2032.32	0.4444	0.443
2035.8	0.5248	0.5222	2035.8	0.4444	0.4428
2039.28	0.5295	0.5221	2039.28	0.442	0.4427
2042.76	0.5277	0.5219	2042.76	0.4428	0.4425
2046.24	0.5263	0.5218	2046.24	0.4411	0.4424
2049.72	0.529	0.5217	2049.72	0.4438	0.4422
2053.2	0.5287	0.5216	2053.2	0.4479	0.4421
2056.68	0.5211	0.5214	2056.68	0.4444	0.442
2060.16	0.524	0.5213	2060.16	0.4426	0.4418
2063.64	0.5257	0.5212	2063.64	0.4418	0.4417
2067.12	0.5246	0.5211	2067.12	0.4399	0.4415
2070.6	0.5292	0.521	2070.6	0.438	0.4414
2074.08	0.5274	0.5208	2074.08	0.4431	0.4412
2077.56	0.5144	0.5207	2077.56	0.436	0.4411
2081.04	0.522	0.5206	2081.04	0.4426	0.441
2084.52	0.5223	0.5205	2084.52	0.4356	0.4408
2088	0.5174	0.5204	2088	0.4379	0.4407
2091.48	0.5176	0.5203	2091.48	0.4395	0.4405
2094.96	0.5231	0.5201	2094.96	0.4479	0.4404
2098.44	0.5129	0.52	2098.44	0.4389	0.4403
2101.92	0.519	0.5199	2101.92	0.441	0.4401
2105.4	0.5197	0.5198	2105.4	0.4375	0.44
2108.88	0.5217	0.5197	2108.88	0.4369	0.4398
2112.36	0.5132	0.5196	2112.36	0.4353	0.4397
2115.84	0.514	0.5195	2115.84	0.4381	0.4396
2119.32	0.5173	0.5193	2119.32	0.4429	0.4394
2122.8	0.5179	0.5192	2122.8	0.4395	0.4393
2126.28	0.5149	0.5191	2126.28	0.4419	0.4392
2129.76	0.5205	0.519	2129.76	0.4412	0.439
2133.24	0.5179	0.5189	2133.24	0.4421	0.4389
2136.72	0.5164	0.5188	2136.72	0.4395	0.4387
2140.2	0.5125	0.5187	2140.2	0.4379	0.4386
2143.68	0.5171	0.5186	2143.68	0.4383	0.4385
2147.16	0.5297	0.5185	2147.16	0.4428	0.4383
2150.64	0.5231	0.5183	2150.64	0.438	0.4382
2154.12	0.5195	0.5182	2154.12	0.4361	0.4381
2157.6	0.5178	0.5181	2157.6	0.4397	0.4379
2161.08	0.5191	0.518	2161.08	0.4395	0.4378
2164.56	0.5203	0.5179	2164.56	0.4389	0.4377
2168.04	0.5263	0.5178	2168.04	0.4432	0.4375
2171.52	0.5229	0.5177	2171.52	0.4383	0.4374
2175	0.5247	0.5176	2175	0.4451	0.4373
2178.48	0.5173	0.5175	2178.48	0.4366	0.4372
2181.96	0.5156	0.5174	2181.96	0.4376	0.437
2185.44	0.5198	0.5173	2185.44	0.4402	0.4369
2188.92	0.5163	0.5172	2188.92	0.4362	0.4368
2192.4	0.5227	0.5171	2192.4	0.4406	0.4366
2195.88	0.5218	0.517	2195.88	0.4389	0.4365
2199.36	0.5189	0.5168	2199.36	0.4435	0.4364
2202.84	0.5222	0.5167	2202.84	0.4353	0.4362
2206.32	0.5223	0.5166	2206.32	0.4377	0.4361
2209.8	0.522	0.5165	2209.8	0.4415	0.436
2213.28	0.5172	0.5164	2213.28	0.4417	0.4359
2216.76	0.524	0.5163	2216.76	0.435	0.4357
2220.24	0.5246	0.5162	2220.24	0.4417	0.4356
2223.72	0.5258	0.5161	2223.72	0.4344	0.4355
2227.2	0.5315	0.516	2227.2	0.4319	0.4354
2230.68	0.5223	0.5159	2230.68	0.4345	0.4352
2234.16	0.5217	0.5158	2234.16	0.4343	0.4351
2237.64	0.5253	0.5157	2237.64	0.4382	0.435
2241.12	0.5284	0.5156	2241.12	0.439	0.4349
2244.6	0.5255	0.5155	2244.6	0.4366	0.4347
2248.08	0.524	0.5154	2248.08	0.4357	0.4346
2251.56	0.5227	0.5153	2251.56	0.4398	0.4345
2255.04	0.522	0.5152	2255.04	0.4325	0.4344
2258.52	0.519	0.5151	2258.52	0.4314	0.4342
2262	0.5214	0.515	2262	0.4322	0.4341
2265.48	0.529	0.5149	2265.48	0.4313	0.434
2268.96	0.5272	0.5148	2268.96	0.4292	0.4339
2272.44	0.5325	0.5147	2272.44	0.43	0.4337
2275.92	0.5288	0.5146	2275.92	0.4266	0.4336
2279.4	0.5246	0.5145	2279.4	0.4403	0.4335
2282.88	0.5176	0.5144	2282.88	0.4372	0.4334
2286.36	0.52	0.5144	2286.36	0.432	0.4333
2289.84	0.526	0.5143	2289.84	0.4311	0.4331
2293.32	0.5255	0.5142	2293.32	0.4331	0.433
2296.8	0.5193	0.5141	2296.8	0.4314	0.4329
2300.28	0.5199	0.514	2300.28	0.431	0.4328
2303.76	0.52	0.5139	2303.76	0.4338	0.4327
2307.24	0.5243	0.5138	2307.24	0.429	0.4325
2310.72	0.5244	0.5137	2310.72	0.4348	0.4324
2314.2	0.526	0.5136	2314.2	0.4279	0.4323
2317.68	0.5221	0.5135	2317.68	0.4381	0.4322
2321.16	0.519	0.5134	2321.16	0.4299	0.4321
2324.64	0.5218	0.5133	2324.64	0.4287	0.4319
2328.12	0.5189	0.5132	2328.12	0.4326	0.4318
2331.6	0.5205	0.5131	2331.6	0.4252	0.4317
2335.08	0.5244	0.513	2335.08	0.4325	0.4316
2338.56	0.5084	0.513	2338.56	0.4296	0.4315
2342.04	0.5195	0.5129	2342.04	0.4265	0.4314
2345.52	0.5215	0.5128	2345.52	0.4304	0.4312
2349	0.5167	0.5127	2349	0.426	0.4311
2352.48	0.5149	0.5126	2352.48	0.4261	0.431
2355.96	0.5175	0.5125	2355.96	0.4314	0.4309
2359.44	0.5148	0.5124	2359.44	0.4259	0.4308
2362.92	0.5154	0.5123	2362.92	0.4262	0.4307
2366.4	0.5165	0.5122	2366.4	0.4259	0.4306
2369.88	0.5121	0.5121	2369.88	0.4275	0.4304
2373.36	0.5133	0.5121	2373.36	0.424	0.4303
2376.84	0.5125	0.512	2376.84	0.4305	0.4302
2380.32	0.5139	0.5119	2380.32	0.4264	0.4301
2383.8	0.5186	0.5118	2383.8	0.4286	0.43
2387.28	0.5191	0.5117	2387.28	0.4273	0.4299
2390.76	0.5197	0.5116	2390.76	0.4324	0.4298
2394.24	0.5112	0.5115	2394.24	0.4344	0.4297
2397.72	0.5125	0.5114	2397.72	0.4267	0.4295
2401.2	0.5243	0.5114	2401.2	0.4219	0.4294
2404.68	0.5193	0.5113	2404.68	0.419	0.4293
2408.16	0.5126	0.5112	2408.16	0.4303	0.4292
2411.64	0.5079	0.5111	2411.64	0.4301	0.4291
2415.12	0.5143	0.511	2415.12	0.4293	0.429
2418.6	0.5086	0.5109	2418.6	0.4232	0.4289
2422.08	0.5141	0.5108	2422.08	0.438	0.4288
2425.56	0.5023	0.5108	2425.56	0.4277	0.4287
2429.04	0.5077	0.5107	2429.04	0.4284	0.4285
2432.52	0.51	0.5106	2432.52	0.4296	0.4284
2436	0.5031	0.5105	2436	0.4231	0.4283
2439.48	0.5148	0.5104	2439.48	0.4337	0.4282
2442.96	0.5074	0.5103	2442.96	0.4308	0.4281
2446.44	0.512	0.5103	2446.44	0.4368	0.428
2449.92	0.5113	0.5102	2449.92	0.4283	0.4279
2453.4	0.5052	0.5101	2453.4	0.4276	0.4278
2456.88	0.5107	0.51	2456.88	0.4248	0.4277
2460.36	0.5072	0.5099	2460.36	0.4278	0.4276
2463.84	0.5051	0.5099	2463.84	0.4234	0.4275
2467.32	0.5108	0.5098	2467.32	0.4238	0.4274
2470.8	0.5022	0.5097	2470.8	0.424	0.4272
2474.28	0.5072	0.5096	2474.28	0.4325	0.4271
2477.76	0.5003	0.5095	2477.76	0.4301	0.427
2481.24	0.5109	0.5095	2481.24	0.4233	0.4269
2484.72	0.5058	0.5094	2484.72	0.4238	0.4268
2488.2	0.5053	0.5093	2488.2	0.4247	0.4267
2491.68	0.4986	0.5092	2491.68	0.433	0.4266
2495.16	0.5027	0.5091	2495.16	0.4294	0.4265
2498.64	0.507	0.5091	2498.64	0.4348	0.4264
2502.12	0.5039	0.509	2502.12	0.4317	0.4263
2505.6	0.5018	0.5089	2505.6	0.4215	0.4262
2509.08	0.5029	0.5088	2509.08	0.4285	0.4261
2512.56	0.5018	0.5087	2512.56	0.4257	0.426
2516.04	0.5056	0.5087	2516.04	0.4324	0.4259
2519.52	0.5112	0.5086	2519.52	0.4335	0.4258
2523	0.5004	0.5085	2523	0.4267	0.4257
2526.48	0.5061	0.5084	2526.48	0.4273	0.4256
2529.96	0.5077	0.5084	2529.96	0.4291	0.4255
2533.44	0.5034	0.5083	2533.44	0.4267	0.4254
2536.92	0.5121	0.5082	2536.92	0.4316	0.4253
2540.4	0.5032	0.5081	2540.4	0.4297	0.4252
2543.88	0.5047	0.508	2543.88	0.4273	0.4251
2547.36	0.5023	0.508	2547.36	0.4225	0.425
2550.84	0.5034	0.5079	2550.84	0.4214	0.4249
2554.32	0.5075	0.5078	2554.32	0.4296	0.4248
2557.8	0.5071	0.5077	2557.8	0.4275	0.4247
2561.28	0.4976	0.5077	2561.28	0.4268	0.4246
2564.76	0.5023	0.5076	2564.76	0.4189	0.4245
2568.24	0.4999	0.5075	2568.24	0.4312	0.4244
2571.72	0.5024	0.5074	2571.72	0.4248	0.4243
2575.2	0.5023	0.5074	2575.2	0.4282	0.4242
2578.68	0.5068	0.5073	2578.68	0.4277	0.4241
2582.16	0.5037	0.5072	2582.16	0.4277	0.424
2585.64	0.499	0.5072	2585.64	0.4206	0.4239
2589.12	0.5117	0.5071	2589.12	0.422	0.4238
2592.6	0.5011	0.507	2592.6	0.4281	0.4237
2596.08	0.501	0.5069	2596.08	0.4224	0.4236
2599.56	0.5155	0.5069	2599.56	0.422	0.4235
2603.04	0.4949	0.5068	2603.04	0.4208	0.4234
2606.52	0.4956	0.5067	2606.52	0.4211	0.4233
2610	0.4994	0.5066	2610	0.4228	0.4232
2613.48	0.4982	0.5066	2613.48	0.434	0.4231
2616.96	0.4988	0.5065	2616.96	0.428	0.423
2620.44	0.5029	0.5064	2620.44	0.4234	0.4229
2623.92	0.501	0.5064	2623.92	0.428	0.4228
2627.4	0.4967	0.5063	2627.4	0.4322	0.4227
2630.88	0.4933	0.5062	2630.88	0.4206	0.4226
2634.36	0.5011	0.5061	2634.36	0.4212	0.4225
2637.84	0.4941	0.5061	2637.84	0.4294	0.4224
2641.32	0.4991	0.506	2641.32	0.4239	0.4223
2644.8	0.4984	0.5059	2644.8	0.4236	0.4222
2648.28	0.4989	0.5059	2648.28	0.4323	0.4221
2651.76	0.503	0.5058	2651.76	0.4217	0.422
2655.24	0.4994	0.5057	2655.24	0.4231	0.4219
2658.72	0.4953	0.5057	2658.72	0.4142	0.4218
2662.2	0.5062	0.5056	2662.2	0.4286	0.4217
2665.68	0.4984	0.5055	2665.68	0.4207	0.4216
2669.16	0.4931	0.5054	2669.16	0.421	0.4215
2672.64	0.5009	0.5054	2672.64	0.4275	0.4215
2676.12	0.5019	0.5053	2676.12	0.4194	0.4214
2679.6	0.5072	0.5052	2679.6	0.4216	0.4213
2683.08	0.5089	0.5052	2683.08	0.4282	0.4212
2686.56	0.5055	0.5051	2686.56	0.4216	0.4211
2690.04	0.5066	0.505	2690.04	0.4251	0.421
2693.52	0.5066	0.505	2693.52	0.4306	0.4209
2697	0.5033	0.5049	2697	0.4225	0.4208
2700.48	0.4872	0.5048	2700.48	0.4265	0.4207
2703.96	0.5029	0.5048	2703.96	0.424	0.4206
2707.44	0.4995	0.5047	2707.44	0.4278	0.4205
2710.92	0.4975	0.5046	2710.92	0.4299	0.4204
2714.4	0.5105	0.5046	2714.4	0.4235	0.4203
2717.88	0.4994	0.5045	2717.88	0.4221	0.4203
2721.36	0.5065	0.5044	2721.36	0.4225	0.4202
2724.84	0.5028	0.5044	2724.84	0.4252	0.4201
2728.32	0.4957	0.5043	2728.32	0.4147	0.42
2731.8	0.5015	0.5042	2731.8	0.4254	0.4199
2735.28	0.5023	0.5042	2735.28	0.4192	0.4198
2738.76	0.5051	0.5041	2738.76	0.4181	0.4197
2742.24	0.5034	0.5041	2742.24	0.4156	0.4196
2745.72	0.4978	0.504	2745.72	0.425	0.4195
2749.2	0.4964	0.5039	2749.2	0.4145	0.4194
2752.68	0.4958	0.5039	2752.68	0.4192	0.4193
2756.16	0.4902	0.5038	2756.16	0.4216	0.4193
2759.64	0.5003	0.5037	2759.64	0.4168	0.4192
2763.12	0.5062	0.5037	2763.12	0.4208	0.4191
2766.6	0.507	0.5036	2766.6	0.4188	0.419
2770.08	0.5051	0.5035	2770.08	0.4254	0.4189
2773.56	0.4979	0.5035	2773.56	0.4226	0.4188
2777.04	0.4956	0.5034	2777.04	0.4276	0.4187
2780.52	0.5005	0.5033	2780.52	0.4221	0.4186
2784	0.5106	0.5033	2784	0.4252	0.4186
2787.48	0.506	0.5032	2787.48	0.4145	0.4185
2790.96	0.502	0.5032	2790.96	0.4184	0.4184
2794.44	0.4968	0.5031	2794.44	0.4159	0.4183
2797.92	0.5011	0.503	2797.92	0.4215	0.4182
2801.4	0.4987	0.503	2801.4	0.4239	0.4181
2804.88	0.4875	0.5029	2804.88	0.4195	0.418
2808.36	0.5031	0.5029	2808.36	0.4119	0.4179
2811.84	0.4982	0.5028	2811.84	0.4188	0.4179
2815.32	0.5043	0.5027	2815.32	0.4152	0.4178
2818.8	0.5053	0.5027	2818.8	0.4213	0.4177
2822.28	0.4995	0.5026	2822.28	0.4121	0.4176
2825.76	0.5045	0.5025	2825.76	0.4102	0.4175
2829.24	0.5041	0.5025	2829.24	0.4297	0.4174
2832.72	0.4991	0.5024	2832.72	0.4215	0.4173
2836.2	0.5084	0.5024	2836.2	0.416	0.4173
2839.68	0.5089	0.5023	2839.68	0.4188	0.4172
2843.16	0.4944	0.5022	2843.16	0.4147	0.4171
2846.64	0.4961	0.5022	2846.64	0.4195	0.417
2850.12	0.5031	0.5021	2850.12	0.4113	0.4169
2853.6	0.5003	0.5021	2853.6	0.4169	0.4168
2857.08	0.4944	0.502	2857.08	0.423	0.4167
2860.56	0.4951	0.5019	2860.56	0.4187	0.4167
2864.04	0.4876	0.5019	2864.04	0.4063	0.4166
2867.52	0.5085	0.5018	2867.52	0.4161	0.4165
2871	0.5	0.5018	2871	0.4251	0.4164
2874.48	0.501	0.5017	2874.48	0.4141	0.4163
2877.96	0.5077	0.5017	2877.96	0.4139	0.4162
2881.44	0.497	0.5016	2881.44	0.4055	0.4162
2884.92	0.489	0.5015	2884.92	0.409	0.4161
2888.4	0.4957	0.5015	2888.4	0.4145	0.416
2891.88	0.4964	0.5014	2891.88	0.415	0.4159
2895.36	0.5013	0.5014	2895.36	0.4118	0.4158
2898.84	0.4959	0.5013	2898.84	0.4022	0.4157
2902.32	0.4845	0.5012	2902.32	0.4058	0.4157
2905.8	0.4946	0.5012	2905.8	0.4108	0.4156
2909.28	0.5067	0.5011	2909.28	0.4169	0.4155
2912.76	0.5004	0.5011	2912.76	0.4148	0.4154
2916.24	0.4973	0.501	2916.24	0.3998	0.4153
2919.72	0.5049	0.501	2919.72	0.4159	0.4153
2923.2	0.4954	0.5009	2923.2	0.4034	0.4152
2926.68	0.5092	0.5008	2926.68	0.4129	0.4151
2930.16	0.4992	0.5008	2930.16	0.4184	0.415
2933.64	0.4976	0.5007	2933.64	0.423	0.4149
2937.12	0.4858	0.5007	2937.12	0.4082	0.4149
2940.6	0.5065	0.5006	2940.6	0.423	0.4148
2944.08	0.5009	0.5006	2944.08	0.4227	0.4147
2947.56	0.4979	0.5005	2947.56	0.4056	0.4146
2951.04	0.4923	0.5005	2951.04	0.4007	0.4145
2954.52	0.495	0.5004	2954.52	0.4105	0.4145
2958	0.4897	0.5003	2958	0.4088	0.4144
2961.48	0.4934	0.5003	2961.48	0.4085	0.4143
2964.96	0.4943	0.5002	2964.96	0.4065	0.4142
2968.44	0.4877	0.5002	2968.44	0.4062	0.4141
2971.92	0.4785	0.5001	2971.92	0.3953	0.4141

## Sheet: Panel c
[Urea] (M)	Relative fluorescence at 680 nm	[Urea] (M)	t= 0 points (red dots)	t = infinity points (blue dots)
0	0.2897
0	0.2892	1.9	1.01	0.37
0	0.2932	2	1.0035	0.39
0.1333	0.2907	2.3	1	0.47
0.3998	0.2968
0.6663	0.298
0.7996	0.3012
0.9329	0.2978
1.1994	0.3157	4.9	0.2871	1.0825
1.3327	0.3213
1.4659	0.3372	4.05	0.3144	1.0538
1.5992	0.354	3.25	0.3008	0.7821
1.7324	0.3657
1.999	0.4015
2.1322	0.4164
2.2655	0.4558
2.3988	0.502
2.532	0.5562
2.6653	0.6115
2.7986	0.6645
2.9318	0.6998
3.0651	0.736
3.1984	0.8004
3.3316	0.8474
3.5982	0.9306
3.8647	0.9853
4.1312	1
4.3978	1.0691
4.6643	1.0742
4.9308	1.0857
5.4639	1.1206
5.7304	1.1237
5.9969	1.1035

## Sheet: Panel d
Urea (M)	Refolding rates (red and green dots)	Std. dev on data on column B				Urea (M)	Slow refolding rates (Blue data points)				Urea (M)	Unfolding rates (red dots)	Std Dev
1.25	3574.5	30.4056				1.9	496				3.25	843.5	16.2635
1.4	3259	133.797				2	657				4.05	955.5	47.3762
1.55	2853	79.196				2.3	500				4.9	1224.5	0.7071
1.8	2505	72.1249									6.1	1578.26
1.9	2318.5	85
1.17	3993
0	11050	2000
0.25	8772	108.894
0.5	8326.5	108.187
0.75	6715.5	977.929
1.9	2478
2	2755
2.3	2000
3.25	851.7
0.75	5475	50
