# Supplementary material for: Microsecond sub-domain motions and the folding and misfolding of the mouse prion protein
Source: eLife. 2019 Apr 26;8:e44766. doi: 10.7554/eLife.44766 (PMC6516828; doi:10.7554/eLife.44766)
Supplement: Figure 5—figure supplement 1—source data 1. [file elife-44766-fig5-figsupp1-data1.xlsx]

## Sheet: Sheet1
Urea (M)	Fu with salt (Blue data points)	Fit to blue data points (black line)	Urea (M)	Fu without salt (red data points)	Fit to red data points
0	0.0063574	0.004059	0	0.011	0.0014699
0	0.0054607	0.004059	0	0.002491	0.0014699
0	-0.0093392	0.004059	0	-0.0049962	0.0014699
0.132	0.005742	0.0054454	0.1333	-0.0070688	0.0019817
0.3961	-0.0061645	0.0097851	0.3998	0.0051148	0.0036002
0.6602	-0.0123	0.0175	0.6663	-0.0137	0.0065317
0.7922	-0.0011251	0.0234	0.7996	0.0015294	0.0087907
0.9243	0.0112	0.0312	0.9329	-0.00038244	0.0118
1.1884	0.0481	0.0549	1.1994	0.0058766	0.0213
1.3204	0.0649	0.0724	1.3327	0.0296	0.0285
1.4524	0.0962	0.0949	1.4659	0.032	0.0381
1.5845	0.1308	0.1235	1.5992	0.0497	0.0507
1.7165	0.1779	0.1591	1.7324	0.0623	0.0672
1.9806	0.2694	0.2546	1.999	0.1089	0.1159
2.1127	0.3149	0.3145	2.1322	0.1439	0.1503
2.2447	0.4005	0.3813	2.2655	0.1884	0.1927
2.3767	0.4328	0.453	2.3988	0.2501	0.2435
2.5088	0.529	0.5266	2.532	0.317	0.3028
2.6408	0.5983	0.5991	2.6653	0.3777	0.3694
2.7729	0.6409	0.6675	2.7986	0.4641	0.4414
2.9049	0.7507	0.7295	2.9318	0.5147	0.5159
3.0369	0.7801	0.7837	3.0651	0.5675	0.5898
3.169	0.8067	0.8296	3.1984	0.6585	0.6598
3.301	0.8655	0.8674	3.3316	0.705	0.7235
3.5651	0.9331	0.9219	3.5982	0.8325	0.8264
3.8292	0.9674	0.9552	3.8647	0.9068	0.8965
4.0933	1.0025	0.9746	4.1312	0.91	0.9403
4.3573	0.9967	0.9858	4.3978	0.9887	0.9663
4.6214	0.9995	0.9921	4.6643	0.9926	0.9812
4.8855	1.0015	0.9956	4.9308	1.0111	0.9896
			5.4639	1.0244	0.9968
			5.7304	1.0115	0.9983
			5.9969
