# Supplementary material for: Microsecond sub-domain motions and the folding and misfolding of the mouse prion protein
Source: eLife. 2019 Apr 26;8:e44766. doi: 10.7554/eLife.44766 (PMC6516828; doi:10.7554/eLife.44766)
Supplement: Figure 5—source data 1. [file elife-44766-fig5-data1.xlsx]

## Sheet: Panel a
Lag time (ms)	Blue curve	Fit to blue curve	Red Curve	Fit to red curve
0.0001375	3.4816	3.4674	3.2994	3.3921
0.0001625	3.4685	3.4362	3.384	3.3581
0.0001875	3.4881	3.4055	3.174	3.3248
0.0002125	3.3373	3.3754	3.394	3.2923
0.0002375	3.3695	3.3457	3.3761	3.2606
0.000275	3.3364	3.3021	3.4064	3.2144
0.000325	3.1485	3.2457	3.1985	3.1552
0.000375	3.1445	3.191	3.0683	3.0986
0.000425	3.2051	3.1382	2.8221	3.0446
0.000475	3.0354	3.087	2.9567	2.993
0.000525	2.9663	3.0374	3.0498	2.9437
0.000575	2.9699	2.9895	2.8324	2.8965
0.000625	2.987	2.9431	2.8094	2.8514
0.000675	2.859	2.8981	2.8165	2.8082
0.000725	2.8919	2.8546	2.68	2.7668
0.0008	2.7588	2.7918	2.6453	2.708
0.0009	2.6535	2.7127	2.7801	2.6352
0.001	2.6503	2.6384	2.5194	2.5681
0.0011	2.5648	2.5686	2.6512	2.5064
0.0012	2.4943	2.5031	2.4757	2.4493
0.0013	2.5306	2.4415	2.4525	2.3965
0.0014	2.4052	2.3835	2.3014	2.3476
0.0015	2.355	2.329	2.2525	2.3022
0.0016	2.2601	2.2776	2.2342	2.2599
0.0017	2.2163	2.2292	2.2789	2.2205
0.00185	2.2002	2.1617	2.1178	2.1662
0.00205	2.15	2.0805	2.0841	2.1016
0.00225	1.9916	2.0079	2.0357	2.0445
0.00245	1.9319	1.943	1.9833	1.9937
0.00265	1.8857	1.8847	1.9282	1.9481
0.00285	1.8309	1.8323	1.9243	1.907
0.00305	1.7676	1.785	1.8539	1.8696
0.00325	1.7033	1.7421	1.8771	1.8355
0.00345	1.6582	1.7032	1.8062	1.8042
0.00365	1.7056	1.6678	1.7795	1.7753
0.00395	1.5908	1.6204	1.7305	1.7359
0.00435	1.5886	1.5658	1.689	1.6895
0.00475	1.5116	1.5194	1.6428	1.6487
0.00515	1.4655	1.4795	1.6651	1.6127
0.00555	1.4395	1.4447	1.5855	1.5805
0.00595	1.407	1.4141	1.5343	1.5516
0.00635	1.385	1.387	1.4967	1.5256
0.00675	1.3851	1.3628	1.5241	1.5021
0.00715	1.3552	1.341	1.4259	1.4808
0.00755	1.343	1.3212	1.4333	1.4614
0.00815	1.3082	1.2949	1.4516	1.4355
0.00895	1.2523	1.2646	1.3975	1.4059
0.00975	1.2286	1.2389	1.3887	1.381
0.0106	1.1941	1.2167	1.3628	1.3598
0.0114	1.1904	1.1975	1.3589	1.3415
0.0122	1.1718	1.1806	1.3621	1.3256
0.013	1.1869	1.1657	1.3188	1.3117
0.0138	1.1669	1.1525	1.2706	1.2994
0.0146	1.1372	1.1407	1.3071	1.2883
0.0154	1.1315	1.1301	1.3087	1.2782
0.0166	1.1188	1.1159	1.2762	1.2646
0.0182	1.1008	1.0998	1.2598	1.2487
0.0198	1.0985	1.0859	1.2338	1.2343
0.0214	1.0718	1.0738	1.215	1.2212
0.023	1.0628	1.0629	1.1591	1.2088
0.0246	1.0498	1.0529	1.1852	1.1971
0.0262	1.0395	1.0436	1.1894	1.1858
0.0278	1.0264	1.0348	1.217	1.1749
0.0294	1.0323	1.0265	1.1662	1.1643
0.031	1.0194	1.0185	1.1547	1.1539
0.0334	1.0016	1.0071	1.125	1.1388
0.0366	0.989	0.9925	1.1108	1.1194
0.0398	0.9762	0.9786	1.0982	1.1007
0.043	0.954	0.9653	1.0633	1.0826
0.0462	0.9526	0.9525	1.06	1.0652
0.0494	0.9352	0.9401	1.0372	1.0484
0.0526	0.9295	0.9282	1.0224	1.0322
0.0558	0.9136	0.9166	1.0084	1.0165
0.059	0.9209	0.9054	0.9887	1.0014
0.0622	0.9042	0.8946	1.0032	0.9867
0.067	0.877	0.8789	0.9644	0.9656
0.0734	0.8623	0.8591	0.931	0.9391
0.0798	0.8381	0.8404	0.8993	0.9142
0.0862	0.8144	0.8227	0.8896	0.8908
0.0926	0.8001	0.8059	0.8723	0.8688
0.099	0.7993	0.79	0.8449	0.848
0.1054	0.7676	0.7749	0.8277	0.8284
0.1118	0.7599	0.7604	0.8171	0.8099
0.1182	0.7465	0.7467	0.8171	0.7924
0.1246	0.7362	0.7335	0.7706	0.7758
0.1342	0.7218	0.7148	0.7673	0.7524
0.147	0.6939	0.6916	0.7373	0.7239
0.1598	0.6705	0.6701	0.7008	0.6979
0.1726	0.6544	0.6502	0.6817	0.6742
0.1854	0.632	0.6315	0.6718	0.6524
0.1982	0.6154	0.6141	0.6348	0.6323
0.211	0.5995	0.5976	0.6124	0.6137
0.2238	0.5801	0.5822	0.6025	0.5964
0.2366	0.5714	0.5675	0.5901	0.5802
0.2494	0.5548	0.5536	0.5699	0.5651
0.2686	0.5332	0.5341	0.5474	0.544
0.2942	0.5089	0.5102	0.5209	0.5187
0.3198	0.4849	0.4883	0.4957	0.4958
0.3454	0.4665	0.4683	0.4802	0.4751
0.371	0.4502	0.4498	0.4507	0.4562
0.3966	0.4315	0.4327	0.4395	0.4388
0.4222	0.4138	0.4168	0.4227	0.4227
0.4478	0.3996	0.402	0.4123	0.4078
0.4734	0.3875	0.3882	0.3903	0.3939
0.499	0.3739	0.3753	0.3735	0.381
0.5374	0.357	0.3574	0.3596	0.363
0.5886	0.3336	0.3359	0.3326	0.3415
0.6398	0.3144	0.3168	0.3179	0.3223
0.691	0.2964	0.2996	0.3005	0.3051
0.7422	0.2801	0.2841	0.2857	0.2896
0.7934	0.2707	0.2701	0.2682	0.2755
0.8446	0.2555	0.2573	0.2574	0.2626
0.8958	0.2462	0.2456	0.2462	0.2509
0.947	0.2335	0.2349	0.2387	0.2401
0.9982	0.2224	0.225	0.2253	0.2301
1.075	0.2099	0.2116	0.2123	0.2165
1.1774	0.1953	0.1958	0.1954	0.2006
1.2798	0.1837	0.1822	0.1814	0.1868
1.3822	0.1701	0.1702	0.1692	0.1746
1.4846	0.1597	0.1595	0.1586	0.1638
1.587	0.1506	0.1501	0.154	0.1542
1.6894	0.1449	0.1416	0.1429	0.1456
1.7918	0.1364	0.134	0.1388	0.1378
1.8942	0.1272	0.127	0.1312	0.1307
1.9966	0.1213	0.1208	0.1215	0.1243
2.1502	0.1129	0.1123	0.1123	0.1157
2.355	0.1032	0.1026	0.1045	0.1058
2.5598	0.0964	0.0943	0.0944	0.0973
2.7646	0.0905	0.0872	0.09	0.09
2.9694	0.0825	0.0809	0.0821	0.0836
3.1742	0.0763	0.0755	0.0809	0.078
3.379	0.0733	0.0706	0.0731	0.073
3.5838	0.0704	0.0663	0.0732	0.0686
3.7886	0.0649	0.0624	0.0685	0.0646
3.9934	0.0616	0.0589	0.0619	0.061
4.3006	0.0565	0.0543	0.0582	0.0562
4.7102	0.0521	0.049	0.0543	0.0508
5.1198	0.0473	0.0446	0.048	0.0463
5.5294	0.0428	0.0408	0.0444	0.0424
5.939	0.0389	0.0375	0.04	0.039
6.3486	0.0366	0.0347	0.0368	0.0361
6.7582	0.0338	0.0322	0.0356	0.0335
7.1678	0.0321	0.03	0.031	0.0313
7.5774	0.0307	0.0281	0.0292	0.0293
7.987	0.0282	0.0264	0.0281	0.0275
8.6014	0.0265	0.0241	0.027	0.0251
9.4206	0.0228	0.0215	0.0229	0.0224
10.2398	0.0206	0.0194	0.0211	0.0202
11.059	0.0185	0.0176	0.02	0.0184
11.8782	0.0173	0.0161	0.0179	0.0168
12.6974	0.0163	0.0147	0.0174	0.0154
13.5166	0.0148	0.0136	0.0164	0.0142
14.3358	0.013	0.0126	0.015	0.0132
15.155	0.0136	0.0117	0.0116	0.0123
15.9742	0.0124	0.0109	0.0126	0.0114
17.203	0.0119	0.00991	0.0116	0.0104
18.8414	0.0112	0.0087778	0.0123	0.0091951
20.4798	0.0098594	0.0078473	0.0093919	0.0082241
22.1182	0.0089739	0.0070712	0.009255	0.0074137
23.7566	0.0086337	0.0064158	0.0068931	0.006729
25.395	0.0076666	0.0058561	0.0078448	0.006144
27.0334	0.0065662	0.0053737	0.0059805	0.0056395
28.6718	0.0062194	0.0049544	0.0051755	0.0052008
30.3102	0.006227	0.004587	0.0050792	0.0048164
31.9486	0.0062197	0.0042631	0.0042091	0.0044772
34.4063	0.0055573	0.0038439	0.0037429	0.0040382
37.6831	0.003686	0.0033831	0.0033793	0.0035554
40.9599	0.0036543	0.0030078	0.0025654	0.0031618
44.2367	0.0030049	0.0026972	0.003482	0.002836
47.5135	0.0031528	0.0024366	0.0031389	0.0025627
50.7903	0.0022075	0.0022156	0.001915	0.0023307
54.0671	0.0014714	0.002026	0.0035016	0.0021317
57.3439	0.0021524	0.0018621	0.0030242	0.0019595
60.6207	0.0025155	0.0017192	0.0029268	0.0018094
63.8975	0.0022991	0.0015937	0.0014634	0.0016775
68.8128	0.0023527	0.001432	0.0012048	0.0015076
75.3664	0.001392	0.0012553	0.002116	0.0013219
81.92	0.0019951	0.0011122	0.0018504	0.0011714
88.4736	0.0016813	0.00099439	0.0013094	0.0010475
95.0272	0.0019234	0.00089601	0.00086049	0.00094394
101.581	0.0016777	0.00081284	0.0011567	0.00085643
108.135	0.0014344	0.0007418	0.0011115	0.00078165
114.688	0.00066255	0.00068053	0.00167	0.00071716
121.242	0.00089643	0.00062726	0.00012017	0.00066108
127.795	0.00091221	0.0005806	0.001258	0.00061195
137.626	0.0008089	0.00052066	0.00046231	0.00054883
150.733	0.0011464	0.00045538	0.0014921	0.00048007
163.84	0.00059669	0.00040269	0.0010283	0.00042457
176.947	0.00063301	0.00035944	0.00075025	0.00037899
190.055	0.00059345	0.0003234	5.5715e-05	0.00034102
203.162	0.00013155	0.00029302	0.0005915	0.000309
216.269	0.00047268	0.00026711	0.00078955	0.00028169
229.376	0.00071063	0.0002448	0.0011396	0.00025818
242.484	0.0010646	0.00022544	0.00076139	0.00023777
255.591	0.00051098	0.0002085	0.00042078	0.00021991
275.252	9.3059e-05	0.00018677	0.00015313	0.00019701
301.466	0.00045672	0.00016316	0.00013616	0.00017211
327.681	-2.9373e-05	0.00014413	-7.0412e-05	0.00015205
353.895	0.00054497	0.00012853	0.00050169	0.0001356
380.11	0.00032325	0.00011556	0.00088533	0.00012192
406.324	0.00055239	0.00010463	0.00066119	0.00011039
432.539	7.2593e-05	9.5324e-05	-0.0001452	0.00010057
458.753	0.00022396	8.7319e-05	-0.0006042	9.2129e-05
484.968	0.00084226	8.0374e-05	-0.00026937	8.4804e-05
511.182	0.00038322	7.4304e-05	0.00058613	7.84e-05
550.504	0.000838	6.6524e-05	0.0002742	7.0194e-05
602.933	-0.00023928	5.8076e-05	0.00084514	6.1282e-05
655.362	2.066e-05	5.1276e-05	0.00044647	5.4108e-05
707.791	0.00015638	4.5707e-05	-0.00059004	4.8232e-05
760.22	0.00028984	4.1078e-05	-0.00053924	4.3348e-05
812.649	-0.00020841	3.718e-05	-9.1648e-05	3.9236e-05
865.077	-0.00017446	3.3862e-05	0.00023287	3.5735e-05
917.506	-0.00051847	3.101e-05	-0.00021228	3.2725e-05
969.936	-0.00056616	2.8537e-05	-0.00023113	3.0116e-05
1022.36	-0.00061715	2.6376e-05	-0.00064279	2.7835e-05

## Sheet: Panel b
Lag time (ms)	Red curve	Fit to red curve	Blue curve	Fit to blue curve
0.0001375	2.0453	2.0399	1.7773	1.816
0.0001625	1.9257	2.0348	1.8361	1.7913
0.0001875	2.1983	2.0298	1.7571	1.7678
0.0002125	2.0565	2.0249	1.8117	1.7456
0.0002375	2.1659	2.02	1.7475	1.7244
0.000275	1.9409	2.0128	1.6473	1.6946
0.000325	2.1005	2.0035	1.6028	1.6581
0.000375	1.8389	1.9944	1.5456	1.6252
0.000425	1.9722	1.9855	1.6301	1.5953
0.000475	1.9537	1.9769	1.6278	1.5682
0.000525	1.9749	1.9685	1.5552	1.5436
0.000575	1.9365	1.9603	1.5916	1.5212
0.000625	1.8799	1.9523	1.4902	1.5009
0.000675	1.7442	1.9445	1.4526	1.4823
0.000725	2.076	1.937	1.3613	1.4654
0.0008	1.8687	1.926	1.442	1.4427
0.0009	1.9422	1.912	1.419	1.4166
0.001	1.8803	1.8987	1.4543	1.3946
0.0011	1.9029	1.886	1.3867	1.3759
0.0012	1.8765	1.874	1.4241	1.3597
0.0013	1.8634	1.8626	1.3275	1.3458
0.0014	1.8096	1.8517	1.2618	1.3335
0.0015	1.959	1.8413	1.3616	1.3227
0.0016	1.8422	1.8314	1.3217	1.3131
0.0017	1.8672	1.822	1.3001	1.3045
0.00185	1.8438	1.8086	1.3074	1.293
0.00205	1.7596	1.7922	1.2846	1.2798
0.00225	1.7504	1.7771	1.252	1.2683
0.00245	1.7414	1.7634	1.2497	1.2581
0.00265	1.7004	1.7507	1.2168	1.249
0.00285	1.74	1.739	1.2607	1.2406
0.00305	1.8133	1.7282	1.2121	1.2328
0.00325	1.6848	1.7181	1.2402	1.2256
0.00345	1.7359	1.7087	1.1849	1.2189
0.00365	1.6424	1.7	1.2244	1.2125
0.00395	1.7825	1.6879	1.1962	1.2037
0.00435	1.669	1.6733	1.2048	1.193
0.00475	1.6855	1.6601	1.1423	1.1833
0.00515	1.6707	1.6482	1.1786	1.1746
0.00555	1.5951	1.6371	1.189	1.1667
0.00595	1.622	1.6269	1.1697	1.1596
0.00635	1.694	1.6172	1.1731	1.153
0.00675	1.5793	1.608	1.1853	1.147
0.00715	1.5757	1.5993	1.136	1.1414
0.00755	1.5351	1.5909	1.152	1.1363
0.00815	1.5355	1.5788	1.1171	1.1292
0.00895	1.5599	1.5634	1.1233	1.1209
0.00975	1.505	1.5488	1.0962	1.1135
0.0106	1.503	1.5347	1.0957	1.1068
0.0114	1.5209	1.521	1.0941	1.1007
0.0122	1.54	1.5077	1.1214	1.095
0.013	1.5034	1.4948	1.0641	1.0896
0.0138	1.5259	1.4822	1.0993	1.0845
0.0146	1.4921	1.47	1.0869	1.0797
0.0154	1.4728	1.458	1.0749	1.075
0.0166	1.459	1.4405	1.0689	1.0683
0.0182	1.4034	1.4182	1.0634	1.0596
0.0198	1.3766	1.3968	1.047	1.0513
0.0214	1.3909	1.3763	1.0507	1.0432
0.023	1.3445	1.3566	1.0278	1.0353
0.0246	1.3471	1.3378	1.0182	1.0276
0.0262	1.3046	1.3197	1.0148	1.0201
0.0278	1.3189	1.3023	1.0002	1.0127
0.0294	1.3051	1.2855	0.9969	1.0054
0.031	1.2672	1.2694	1.0003	0.9983
0.0334	1.2388	1.2462	0.9958	0.9878
0.0366	1.2088	1.2172	0.9762	0.9743
0.0398	1.1663	1.1901	0.9528	0.9612
0.043	1.1639	1.1647	0.941	0.9486
0.0462	1.1351	1.1408	0.9261	0.9363
0.0494	1.1032	1.1182	0.9301	0.9245
0.0526	1.1016	1.0969	0.9198	0.913
0.0558	1.0755	1.0766	0.9089	0.9019
0.059	1.0826	1.0573	0.8881	0.8911
0.0622	1.0491	1.0389	0.8745	0.8806
0.067	1.0157	1.0129	0.8665	0.8655
0.0734	0.9754	0.9806	0.8517	0.8463
0.0798	0.9554	0.9508	0.8225	0.8282
0.0862	0.9244	0.9231	0.8072	0.811
0.0926	0.8943	0.8971	0.8005	0.7947
0.099	0.8723	0.8728	0.7802	0.7792
0.1054	0.8407	0.85	0.7825	0.7644
0.1118	0.8378	0.8283	0.7476	0.7503
0.1182	0.8028	0.8079	0.7394	0.7368
0.1246	0.7862	0.7885	0.7244	0.724
0.1342	0.7641	0.7612	0.7104	0.7056
0.147	0.7248	0.7277	0.6842	0.6829
0.1598	0.6877	0.6972	0.6669	0.6618
0.1726	0.6689	0.6693	0.6411	0.6421
0.1854	0.6367	0.6437	0.6224	0.6238
0.1982	0.634	0.62	0.6114	0.6066
0.211	0.5956	0.5982	0.5855	0.5904
0.2238	0.5874	0.5779	0.5822	0.5752
0.2366	0.5645	0.5591	0.5649	0.5607
0.2494	0.5324	0.5415	0.5481	0.5471
0.2686	0.5196	0.5174	0.5304	0.5278
0.2942	0.4919	0.4886	0.508	0.5042
0.3198	0.4621	0.4631	0.4859	0.4827
0.3454	0.4395	0.4405	0.4585	0.4629
0.371	0.4183	0.4201	0.4453	0.4447
0.3966	0.4024	0.4017	0.4252	0.4278
0.4222	0.381	0.3849	0.4122	0.4122
0.4478	0.3696	0.3696	0.3967	0.3976
0.4734	0.36	0.3556	0.382	0.384
0.499	0.3414	0.3426	0.3671	0.3712
0.5374	0.3265	0.325	0.3529	0.3536
0.5886	0.3081	0.3041	0.3296	0.3324
0.6398	0.2871	0.2859	0.3101	0.3135
0.691	0.2692	0.2697	0.2934	0.2965
0.7422	0.2528	0.2552	0.2772	0.2813
0.7934	0.2382	0.2422	0.2642	0.2674
0.8446	0.2269	0.2304	0.2492	0.2548
0.8958	0.2183	0.2197	0.2429	0.2432
0.947	0.2065	0.2098	0.2301	0.2326
0.9982	0.1974	0.2008	0.222	0.2229
1.075	0.1904	0.1886	0.2088	0.2096
1.1774	0.1719	0.1743	0.1933	0.194
1.2798	0.1612	0.1619	0.179	0.1805
1.3822	0.1538	0.151	0.1663	0.1686
1.4846	0.146	0.1414	0.155	0.1581
1.587	0.1385	0.1329	0.151	0.1488
1.6894	0.1263	0.1253	0.1397	0.1404
1.7918	0.1158	0.1184	0.1321	0.1328
1.8942	0.1122	0.1122	0.1254	0.126
1.9966	0.1097	0.1066	0.1184	0.1197
2.1502	0.0993	0.099	0.1114	0.1114
2.355	0.0902	0.0904	0.1041	0.1018
2.5598	0.0802	0.083	0.0965	0.0936
2.7646	0.0759	0.0766	0.0864	0.0865
2.9694	0.0717	0.071	0.0824	0.0803
3.1742	0.0708	0.0662	0.0759	0.0749
3.379	0.0644	0.0619	0.0716	0.0701
3.5838	0.0574	0.058	0.0665	0.0658
3.7886	0.0532	0.0546	0.0609	0.0619
3.9934	0.0512	0.0515	0.0587	0.0585
4.3006	0.0476	0.0474	0.0545	0.0539
4.7102	0.0443	0.0428	0.0487	0.0486
5.1198	0.0387	0.0389	0.0464	0.0443
5.5294	0.0341	0.0355	0.0424	0.0405
5.939	0.0332	0.0327	0.0393	0.0373
6.3486	0.03	0.0302	0.0347	0.0345
6.7582	0.0265	0.028	0.032	0.032
7.1678	0.0261	0.0261	0.0307	0.0298
7.5774	0.0237	0.0244	0.0273	0.0279
7.987	0.023	0.0229	0.0255	0.0262
8.6014	0.0185	0.0209	0.0233	0.0239
9.4206	0.0206	0.0186	0.0228	0.0214
10.2398	0.0186	0.0168	0.0218	0.0193
11.059	0.0183	0.0152	0.0202	0.0175
11.8782	0.0128	0.0139	0.0172	0.016
12.6974	0.0124	0.0127	0.0148	0.0147
13.5166	0.0132	0.0117	0.013	0.0135
14.3358	0.0093928	0.0109	0.013	0.0125
15.155	0.0072717	0.0101	0.0128	0.0116
15.9742	0.007233	0.0094068	0.0112	0.0109
17.203	0.0073014	0.0085223	0.0108	0.0098521
18.8414	0.006535	0.0075426	0.0074034	0.0087272
20.4798	0.0056298	0.0067383	0.0066161	0.0078026
22.1182	0.004464	0.0060682	0.0084085	0.0070314
23.7566	0.0046179	0.0055027	0.0058583	0.00638
25.395	0.0048372	0.0050202	0.004963	0.0058238
27.0334	0.0060327	0.0046047	0.0051087	0.0053443
28.6718	0.004306	0.0042436	0.004503	0.0049274
30.3102	0.003522	0.0039275	0.0054735	0.0045623
31.9486	0.0045896	0.0036489	0.0050186	0.0042402
34.4063	0.0029657	0.0032886	0.0066404	0.0038235
37.6831	0.0010587	0.0028929	0.004532	0.0033653
40.9599	0.0012655	0.0025708	0.0039176	0.0029921
44.2367	0.0002289	0.0023044	0.0033124	0.0026832
47.5135	0.00087817	0.0020811	0.0039083	0.0024241
50.7903	0.00078921	0.0018917	0.0037741	0.0022042
54.0671	0.0021866	0.0017294	0.0027798	0.0020158
57.3439	0.0023376	0.0015891	0.0031711	0.0018527
60.6207	0.0018577	0.0014668	0.0023763	0.0017105
63.8975	0.0025179	0.0013594	0.001896	0.0015857
68.8128	0.000789	0.0012212	0.0019988	0.0014249
75.3664	-4.4352e-05	0.0010702	0.0024133	0.0012491
81.92	-3.141e-05	0.00094793	0.0026575	0.0011067
88.4736	0.00079877	0.00084732	0.002037	0.00098952
95.0272	0.0011286	0.00076333	0.0019067	0.00089163
101.581	0.0016988	0.00069236	0.0020247	0.00080889
108.135	0.001051	0.00063175	0.0014413	0.0007382
114.688	0.0012611	0.00057949	0.0025428	0.00067724
121.242	0.0013551	0.00053407	0.0026487	0.00062424
127.795	0.0013659	0.00049428	0.0015786	0.00057781
137.626	0.0020007	0.00044319	0.0024925	0.00051817
150.733	0.0015181	0.00038756	0.0020194	0.00045321
163.84	-0.0012186	0.00034267	0.0021304	0.00040078
176.947	0.00044706	0.00030582	0.0015039	0.00035773
190.055	9.751e-05	0.00027513	-0.00020685	0.00032187
203.162	-0.00081236	0.00024926	0.00099146	0.00029163
216.269	-0.0013569	0.0002272	0.00059189	0.00026584
229.376	0.001199	0.00020821	0.0011612	0.00024365
242.484	0.00096561	0.00019173	-0.00050866	0.00022438
255.591	0.0012026	0.00017731	8.7395e-05	0.00020752
275.252	-0.0007094	0.00015882	0.00065526	0.0001859
301.466	-0.00060291	0.00013873	0.0016661	0.00016239
327.681	-3.889e-05	0.00012254	0.001314	0.00014346
353.895	-0.00090369	0.00010928	0.001234	0.00012793
380.11	-0.0005596	9.8241e-05	0.00066413	0.00011502
406.324	-0.00097849	8.8946e-05	0.0011493	0.00010415
432.539	-0.00057875	8.103e-05	0.0013003	9.4881e-05
458.753	-0.0014759	7.4222e-05	0.00030801	8.6913e-05
484.968	-0.0013257	6.8317e-05	0.0014986	8.0001e-05
511.182	-0.00059088	6.3155e-05	0.0015366	7.3959e-05
550.504	-0.00019636	5.6541e-05	0.0011337	6.6216e-05
602.933	-0.001021	4.9358e-05	0.0018991	5.7807e-05
655.362	-0.00036412	4.3577e-05	0.0021536	5.1039e-05
707.791	-4.4794e-05	3.8843e-05	0.0019655	4.5496e-05
760.22	0.00061022	3.4908e-05	0.0011196	4.0888e-05
812.649	-6.0778e-05	3.1595e-05	0.0023567	3.7008e-05
865.077	-0.00044918	2.8775e-05	0.002449	3.3706e-05
917.506	-0.0012386	2.6351e-05	0.0033215	3.0867e-05
969.936	-0.0011401	2.4249e-05	0.0028892	2.8405e-05
1022.36	-0.00031133	2.2412e-05	0.0036868	2.6254e-05
