# Supplementary material for: Microsecond sub-domain motions and the folding and misfolding of the mouse prion protein
Source: eLife. 2019 Apr 26;8:e44766. doi: 10.7554/eLife.44766 (PMC6516828; doi:10.7554/eLife.44766)
Supplement: Figure 6—source data 1. [file elife-44766-fig6-data1.xlsx]

## Sheet: Panel a
	Black bars	Std Dev	Grey bar	Std Dev
W144/C199	86580	12244.3	187287	300.662
W171/C225	14787.3	515.084	76190.5	26937.4

## Sheet: Panel b
	Black bars	Std Dev	Grey bar	Std Dev
W144/C199	151515	122443	190476	67343.5
W171/C225	39190	12568	285116	50000
